# Supplementary material for: ZFP57 regulation of transposable elements and gene expression within and beyond imprinted domains
Source: Epigenetics Chromatin. 2019 Aug 9;12:49. doi: 10.1186/s13072-019-0295-4 (PMC6688207; doi:10.1186/s13072-019-0295-4)
Supplement: Supplementary file 2 — Additional file 2. Additional tables. [file 13072_2019_295_MOESM2_ESM.xlsx]

## Sheet: Table S1
Table S1. Expression levels of differentially expressed genes in WT and ZFP57 KO ES cells as determined by RNA-seq (FPKM values).
GENEID	CHR	START	END	STRAND	WT-1	WT-2	WT-3	KO-1	KO-2	Index
Slco5a1	chr1	12866549	12991135	-	1.1005	1.5	1.40823	0.662374	0.506539	1
Eya1	chr1	14168957	14310199	-	1.41348	1.44175	1.41088	3.88359	3.90631	2
Terf1	chr1	15805645	15844052	+	39.3888	39.7097	37.6072	28.8589	25.6616	3
Paqr8	chr1	20890621	20938756	+	1.12308	1.18684	0.955742	3.0481	2.95891	4
Dst	chr1	33908224	34308662	+	28.3077	28.9421	27.5715	35.5493	35.3823	5
Fam168b	chr1	34813217	34843050	-	9.45068	10.5336	10.149	14.3025	14.1775	6
Plekhb2	chr1	34849958	34879585	+	2.09358	2.25363	2.32445	4.97931	5.23649	7
Tmem131	chr1	36792188	36939527	-	29.9779	30.1967	28.8243	36.9068	39.3569	8
Cnga3	chr1	37218277	37263384	+	2.89812	2.24614	2.75342	0.593449	0.628699	9
Lonrf2	chr1	38794508	38821215	-	0.224809	0.187256	0.197373	0.880787	0.920511	10
Stat4	chr1	51987147	52107189	+	2.35156	2.48913	2.66882	1.09166	0.965778	11
Ankrd44	chr1	54645339	54926387	-	1.27467	0.992614	1.42082	0.432622	0.359922	12
Boll	chr1	55300068	55363469	-	4.17636	4.00802	3.59229	0.455725	0.302381	13
Fzd7	chr1	59482146	59486955	+	2.78401	2.8524	2.51681	5.32093	6.0192	14
Nrp2	chr1	62703316	62818692	+	0.196291	0.317713	0.188693	1.08938	0.965698	15
Zdbf2	chr1	63200357	63314575	+	13.9064	13.1308	13.6496	21.8889	23.614	16
Fzd5	chr1	64730557	64737750	-	12.6561	11.8965	11.8788	17.8994	20.2886	17
Plekhm3	chr1	64789120	64956824	-	4.41387	4.31854	4.4336	1.97305	1.78983	18
Fn1	chr1	71585472	71653234	-	155.628	156.531	156.011	189.077	200.844	19
Mreg	chr1	72159232	72212307	-	64.8803	62.3978	70.3807	38.5574	41.9683	20
Igfbp2	chr1	72824479	72852471	+	40.8754	39.1603	40.3774	20.867	19.3017	21
Ctdsp1	chr1	74391608	74397285	+	3.32837	3.46139	3.51064	5.7344	6.41432	22
Epha4	chr1	77367184	77515088	-	4.11979	3.73445	3.8098	7.0938	9.93298	23
B3gnt7	chr1	86303220	86307305	+	5.13832	6.18228	5.93613	13.5133	12.0202	24
Gbx2	chr1	89927961	89931176	-	9.62081	12.4491	9.84262	18.6606	18.0033	25
Rbm44	chr1	91145102	91170795	+	4.39394	4.36872	5.33682	0.769166	0.578559	26
Tfcp2l1	chr1	118627944	118685168	+	90.1402	87.3981	88.608	132.152	136.874	27
Inhbb	chr1	119415464	119422248	-	0.6855	0.602465	0.734213	1.67522	2.86505	28
Ccdc93	chr1	121431066	121506460	+	7.80749	7.76774	6.86715	10.6849	11.5335	29
Pfkfb2	chr1	130689042	130729253	-	0.947172	1.01638	1.1947	1.738	2.09552	30
AA986860	chr1	130731975	130744622	+	0.193063	0.210094	0.108069	0.880285	1.08348	31
Nucks1	chr1	131910457	131936321	+	73.7094	76.1809	74.6899	101.271	102.608	32
Pik3c2b	chr1	133046011	133108688	+	2.14093	1.98265	2.40864	1.16169	1.09658	33
Ppp1r15b	chr1	133131165	133139800	+	24.4259	25.1826	25.0913	30.8812	32.1989	34
Ppfia4	chr1	134296782	134332928	-	4.96293	4.81012	5.68365	3.27583	3.06927	35
Kdm5b	chr1	134560177	134632878	+	80.7002	80.2541	82.7068	54.5365	60.0928	36
Elf3	chr1	135253573	135258472	-	19.0317	17.3757	17.6343	26.6585	33.7828	37
Lad1	chr1	135818597	135833341	+	0.520736	0.402857	0.426851	1.78837	1.67701	38
Dennd1b	chr1	138963708	139176042	+	4.44801	4.51324	4.83348	6.32404	7.15368	39
Cfh	chr1	140085854	140183411	-	0.838394	0.948986	0.562665	3.20909	2.46501	40
Fam129a	chr1	151571372	151719347	+	9.87937	10.1283	9.65704	20.4685	22.9381	41
Lamc2	chr1	153122755	153186447	-	2.41019	1.97908	1.71599	4.7109	5.38792	42
Lamc1	chr1	153218921	153332786	-	49.7867	44.8852	45.3699	60.2085	62.558	43
Npl	chr1	153503015	153549714	-	3.37026	2.37166	3.20702	0.817251	1.03288	44
Prdx6	chr1	161240111	161251210	-	57.6549	56.2981	62.213	33.4445	33.4481	45
Atp1b1	chr1	164437098	164458355	-	49.6008	50.3862	49.7048	63.3731	64.6442	46
Dusp27	chr1	166098147	166127898	-	12.4544	12.78	11.6181	7.8102	6.95761	47
Ddr2	chr1	169972306	170088944	-	2.19193	2.19121	2.09044	0.435682	0.500377	48
Pigm	chr1	172376530	172384099	+	3.98526	4.11129	4.20793	5.63783	5.95427	49
Tagln2	chr1	172500245	172507375	+	8.37671	7.40736	7.02333	16.1094	18.0223	50
Cep170	chr1	176733652	176807124	-	7.86367	7.7314	8.37533	5.6365	5.46298	51
Akt3	chr1	177022114	177248767	-	3.12213	2.80376	3.54789	1.45293	1.40016	52
Lefty1	chr1	180935038	180938401	+	5.1504	6.97486	7.82746	2.63299	1.72784	53
Enah	chr1	181896385	182019980	-	28.6799	27.8692	27.8914	19.5187	17.2632	54
Marc2	chr1	184813067	184845847	-	9.32297	9.11496	9.64153	18.085	14.9973	55
C130074G19Rik	chr1	184871925	184883036	-	2.13998	1.66614	1.47379	4.45433	4.63487	56
Slc30a10	chr1	185454847	185468761	+	0.142823	0.180387	0.13806	0.697591	0.863019	57
D1Pas1	chr1	186967415	186970627	+	3.22063	2.99154	3.00964	6.16972	7.29188	58
Slc30a1	chr1	191906780	191913247	+	3.40859	4.02508	3.74933	6.46381	6.43171	59
Plxna2	chr1	194619828	194816868	+	0.86028	0.926144	0.847538	1.80277	1.76791	60
Nmt2	chr2	3284211	3328877	+	22.0195	20.6529	23.7973	14.1408	12.2182	61
Fam107b	chr2	3713457	3782134	+	5.0529	4.39518	4.54382	8.0374	9.44833	62
Frmd4a	chr2	4152862	4614043	+	4.05371	4.21008	4.02016	6.1926	6.57327	63
Cdc123	chr2	5794293	5844960	-	13.1383	13.6609	12.542	21.5356	20.8373	64
Nudt5	chr2	5845033	5868736	+	7.30828	8.29071	6.99869	19.8918	19.3795	65
Dpp7	chr2	25352289	25356332	-	6.69938	6.75992	6.04288	10.9811	11.8426	66
Egfl7	chr2	26581055	26592682	+	4.4902	4.20764	4.42267	1.98622	2.01639	67
Ppp1r26	chr2	28447940	28455508	+	1.67711	1.57468	1.90516	0.506945	0.593198	68
Ass1	chr2	31470269	31520670	+	64.2585	61.8386	63.4985	97.9523	101.277	69
Gm5424	chr2	31470307	31520629	+	67.5177	64.9863	66.6801	102.926	106.385	70
Aif1l	chr2	31950302	31973442	+	0.785285	0.655384	1.01136	0.1359	0.0981461	71
Fam102a	chr2	32535358	32569750	+	4.4336	4.50485	3.90449	8.00293	9.54458	72
Zbtb34	chr2	33406107	33431324	-	5.48827	5.02976	5.38378	7.35225	7.85255	73
Pkp4	chr2	59160849	59355205	+	23.123	22.3339	22.6462	17.4699	16.6379	74
Baz2b	chr2	59899362	60125740	-	20.2168	19.0595	20.4337	13.1471	11.7787	75
Rbms1	chr2	60751952	60963204	-	4.87144	5.15911	5.07114	8.33291	9.36813	76
Dpp4	chr2	62330072	62412231	-	12.5475	14.4037	14.5312	5.82613	6.15494	77
Gca	chr2	62664326	62694109	+	9.15757	8.80849	10.3679	4.72521	5.38795	78
Csrnp3	chr2	65845766	66031546	+	1.64264	1.91135	1.75827	3.98677	3.50223	79
Lrp2	chr2	69424334	69586067	-	2.77251	2.88013	3.03483	1.15399	0.878358	80
Sp5	chr2	70474922	70477726	+	1.97842	2.90637	2.42675	8.11973	6.19351	81
Itga6	chr2	71786938	71858427	+	12.3006	11.2642	11.9561	16.4681	20.3535	82
Pdk1	chr2	71873223	71903858	+	3.58143	3.51977	3.39913	6.58993	6.35827	83
Chn1	chr2	73610659	73775346	-	6.63131	6.87465	6.66225	4.34953	3.56481	84
Nfe2l2	chr2	75675518	75704641	-	30.7156	31.3475	31.641	42.1366	45.0688	85
Cyct	chr2	76353941	76360453	-	23.2379	26.8841	28.3377	7.11545	5.1204	86
Sestd1	chr2	77180339	77280592	-	3.42465	3.19394	3.58661	2.10884	2.04759	87
Fam171b	chr2	83812727	83881358	+	0.880751	0.885351	1.01889	0.30968	0.192135	88
Tfpi	chr2	84432859	84476775	-	2.56415	3.03156	2.99922	5.64202	7.2073	89
Slc43a1	chr2	84839407	84863586	+	4.73366	5.65504	5.96034	2.68613	2.14346	90
Slc43a3	chr2	84936645	84958509	+	3.25977	2.25834	3.14252	0.279194	0.39	91
Pramel7	chr2	87489087	87492418	-	2.01622	0.912728	1.34158	0.164388	0.116865	92
Ptprj	chr2	90429755	90580647	-	4.20815	4.472	4.50675	3.04724	2.71942	93
Trim44	chr2	102300118	102400900	-	3.79962	3.71479	3.10899	8.10441	8.86661	94
Ryr3	chr2	112631381	113030331	-	0.309236	0.233584	0.317525	0.0979812	0.0905234	95
Fmn1	chr2	113327735	113716767	+	1.48006	1.20815	1.20586	2.15083	2.0278	96
Spred1	chr2	117121070	117182277	+	3.27606	3.53243	3.18688	6.46624	6.63297	97
Spint1	chr2	119237359	119249513	+	16.3003	14.3936	13.0989	34.7998	40.0199	98
Rpap1	chr2	119763958	119787537	-	14.1155	13.1181	15.1172	9.9236	9.64682	99
Trp53bp1	chr2	121194834	121271407	-	7.54866	8.23082	8.15412	4.83709	4.3403	100
Ckmt1	chr2	121358640	121363737	+	7.11445	5.96162	5.97238	11.0403	11.9583	101
Sord	chr2	122234838	122265337	+	7.29002	5.82424	7.59316	3.58684	3.21547	102
Myef2	chr2	125086270	125123660	-	35.1794	35.6449	37.1605	20.0919	16.9521	103
Gpat2	chr2	127425198	127436092	+	2.71614	2.7907	2.93827	0.916236	0.489384	104
Ttl	chr2	129065946	129096283	+	4.95213	4.51398	4.87115	2.96998	2.71989	105
Slc23a2	chr2	132052495	132145108	-	5.79885	5.87143	5.79507	8.00256	8.01528	106
Flrt3	chr2	140658197	140671476	-	0.638899	0.778303	0.51102	2.86419	2.47936	107
Ralgapa2	chr2	146241298	146512004	-	4.27752	4.16557	4.20772	2.7979	2.73879	108
Xrn2	chr2	147013059	147077997	+	34.3611	34.5938	34.6048	44.4974	43.7277	109
Acss1	chr2	150618110	150668240	-	3.91169	3.7175	3.77767	8.71491	8.38167	110
Pygb	chr2	150786795	150831748	+	18.3386	17.8172	18.8701	23.5614	23.891	111
Cdk5rap1	chr2	154335385	154372719	-	9.84927	10.3929	10.9811	5.28679	4.52392	112
Eif2s2	chr2	154871409	154892906	-	300.502	293.496	301.143	203.443	194.231	113
Cpne1	chr2	156071840	156111965	-	6.9482	6.67977	7.16716	9.48988	10.7449	114
Ndrg3	chr2	156927341	156992111	-	4.33506	4.14453	4.7894	7.58562	7.33205	115
Snhg11	chr2	158375637	158386145	+	6.46939	6.44444	6.37296	3.11223	2.24573	116
Serinc3	chr2	163623272	163645143	-	23.6832	22.3446	23.9939	8.60832	9.47385	117
Ctsa	chr2	164832871	164841032	+	14.5694	14.5328	14.7118	25.0813	25.1079	118
Sulf2	chr2	166073898	166155683	-	20.7512	21.4253	22.0015	32.6392	32.0908	119
Atp9a	chr2	168634437	168742136	-	6.70372	5.98128	6.65026	3.82986	4.27636	120
Nespas	chr2	174281236	174295436	-	13.378	13.0497	14.8498	23.1225	21.6354	121
Tcfl5	chr2	180621956	180642691	-	5.58197	4.72302	5.34162	0.796613	0.623775	122
Chrna4	chr2	181022310	181039177	-	0.122493	0.141568	0.0619959	1.43853	1.40438	123
Rtel1	chr2	181319723	181356616	+	9.4808	9.35078	9.91045	15.6058	14.5557	124
Zfp704	chr3	9427009	9610085	-	6.13489	6.59498	6.11702	8.96699	8.71031	125
Fabp5	chr3	10012584	10016610	+	8.30748	6.39522	8.10259	1.42373	1.90074	126
Gm9833	chr3	10088276	10092562	+	8.17438	7.30204	7.40953	4.07528	3.56826	127
Impa1	chr3	10313539	10331439	-	18.6113	19.098	20.2979	13.1662	11.7766	128
Chmp4c	chr3	10366972	10391005	+	17.803	17.0716	16.8053	11.434	10.7369	129
Car13	chr3	14641726	14663002	+	5.02762	5.25769	4.58089	11.0554	8.83249	130
Lrrc34	chr3	30624266	30647818	-	16.7482	18.6836	17.0961	30.7423	28.7167	131
Lrrc31	chr3	30678553	30699843	-	2.26567	2.42179	2.35443	4.73435	5.33173	132
Skil	chr3	31095057	31122923	+	15.4631	15.6337	18.0605	6.54491	6.8652	133
Actl6a	chr3	32708545	32726971	+	65.8976	68.4329	65.95	50.6334	50.3496	134
Slc7a11	chr3	50364935	50443613	-	0.15904	0.231827	0.146931	0.726957	1.08366	135
Setd7	chr3	51515317	51560823	-	1.26591	1.10086	1.42634	0.465022	0.487573	136
Sohlh2	chr3	55182043	55209957	+	7.82385	6.09514	8.30951	2.54747	3.71076	137
Nbea	chr3	55625197	56183701	-	2.02892	1.94916	1.94103	1.21276	1.2617	138
Med12l	chr3	59006977	59318412	+	1.93635	2.04152	2.32059	0.581976	0.503906	139
Igsf10	chr3	59316734	59344256	-	0.274878	0.264314	0.272784	0.0720133	0.0700565	140
Tiparp	chr3	65528446	65555518	+	6.38928	7.87943	6.3145	12.9777	12.1444	141
Golim4	chr3	75876182	75956949	-	1.32562	1.2795	1.49812	0.562678	0.589076	142
Fnip2	chr3	79455970	79567679	-	5.03797	5.57756	5.39739	10.3671	11.2718	143
Trim2	chr3	84160438	84304775	-	1.92081	2.14013	1.91376	4.06617	3.24927	144
Kirrel	chr3	87078591	87174747	-	7.23726	7.88147	8.02972	5.12958	5.01636	145
Nes	chr3	87971092	87980451	+	2.56107	2.86271	2.71663	1.46305	1.16503	146
Bglap3	chr3	88368615	88372741	-	8.65833	7.73861	9.88612	3.05942	1.78569	147
Mex3a	chr3	88532394	88541394	+	7.62498	8.20033	8.24234	11.646	11.8607	148
Zbtb7b	chr3	89377645	89393203	-	2.57268	2.56721	2.38016	4.44866	4.57516	149
Shc1	chr3	89418550	89430029	+	12.774	13.3189	12.9013	20.1806	21.1827	150
Il6ra	chr3	89869323	89913162	-	1.08386	0.934406	0.811086	2.21226	2.31912	151
S100a1	chr3	90511033	90514330	-	1.50237	1.07657	1.15014	4.62992	4.71261	152
S100a13	chr3	90514434	90524581	+	2.33111	2.58806	2.17093	9.8624	10.5644	153
Cgn	chr3	94760069	94786515	-	2.715	1.78596	2.57401	0.572771	0.568088	154
Hormad1	chr3	95559676	95587860	+	21.7061	23.1638	25.0982	10.9898	8.86816	155
Txnip	chr3	96557956	96561857	+	16.8426	15.9827	17.1721	22.4054	28.2867	156
Tspan2	chr3	102734769	102772310	+	1.29168	1.57624	1.98194	0.293529	0.323911	157
Sycp1	chr3	102818498	102936100	-	1.63404	1.31388	1.40631	0.400327	0.532302	158
Magi3	chr3	104013264	104220406	-	4.69906	5.10626	4.77206	6.6653	7.7527	159
Sars	chr3	108424863	108445259	-	31.6212	30.846	30.8198	38.4317	41.9157	160
Cdc14a	chr3	116272552	116424032	-	2.32266	2.17272	2.16854	3.70697	4.53559	161
Dapp1	chr3	137931005	137981549	-	1.49018	2.12759	1.70523	4.20817	3.91846	162
Ssx2ip	chr3	146404641	146440137	+	6.79256	7.4727	6.87211	4.09723	4.40348	163
Adgrl2	chr3	148815585	148954635	-	2.32896	2.67611	2.35377	4.12073	3.72937	164
Wls	chr3	159839694	159935175	+	2.89188	2.83252	2.32033	7.43974	5.86794	165
Wwp1	chr4	19608299	19709004	-	6.81226	7.31382	7.11898	10.1654	9.8614	166
Fut9	chr4	25609332	25800003	-	4.57528	5.20771	5.04235	7.50536	6.65492	167
Epha7	chr4	28813130	28967503	+	0.744183	0.965239	0.765262	1.84041	1.54259	168
Bach2	chr4	32417434	32586108	+	0.311439	0.461748	0.393289	0.994542	1.14319	169
Ddx58	chr4	40203776	40239825	-	6.74019	7.44256	6.12543	10.5351	10.1473	170
Aqp3	chr4	41092723	41098183	-	14.9928	13.7027	13.853	32.3559	31.7176	171
AI464131	chr4	41495600	41503075	-	3.86636	3.52547	3.54846	7.42432	6.68594	172
Unc13b	chr4	43058983	43264887	+	4.05083	3.30981	3.68002	1.99742	2.32697	173
Fsd1l	chr4	53631470	53707009	+	3.41722	3.84114	3.70609	7.08234	7.4679	174
Klf4	chr4	55527136	55532475	-	30.1391	25.8834	28.2654	42.3259	51.6644	175
D630039A03Rik	chr4	57908383	57916264	-	0.319045	0.316555	0.325662	1.52432	1.42611	176
Lpar1	chr4	58435251	58553491	-	23.8984	21.3446	23.283	9.66009	8.34503	177
Mpdz	chr4	81278498	81442815	-	1.32141	1.33696	1.52399	0.512598	0.540933	178
Sh3gl2	chr4	85205455	85389379	+	12.8483	14.6414	13.5913	24	22.9686	179
Plin2	chr4	86656564	86670059	-	5.21325	4.72326	4.96673	9.4892	12.2104	180
Klhl9	chr4	88718291	88722508	-	9.79517	10.0967	10.0035	13.6131	15.5454	181
Mtap	chr4	89137369	89181090	+	33.1952	31.843	32.637	19.0877	17.1652	182
Cachd1	chr4	100776678	101003748	+	4.77641	5.3204	4.97044	9.44534	8.28906	183
Raver2	chr4	101069037	101152370	+	2.26573	1.84659	2.1618	0.929161	0.912514	184
Ppap2b	chr4	105157346	105232767	+	4.12526	3.5489	3.80911	6.9623	8.01442	185
Acot11	chr4	106744560	106799831	-	1.46072	1.35383	1.5634	0.198923	0.127834	186
Lrrc42	chr4	107233513	107253533	-	13.0717	12.3748	12.655	7.72673	7.32403	187
Rab3b	chr4	108879069	108943324	+	0.671194	0.460213	0.763442	0.109365	0.114577	188
Ptch2	chr4	117096355	117114831	+	3.30788	3.51589	3.54876	1.69616	1.46995	189
Ccdc30	chr4	119322892	119415521	-	2.24922	2.41392	2.53526	1.00174	0.665055	190
Col9a2	chr4	121039565	121055325	+	2.42789	2.29365	2.45425	0.751598	0.824567	191
Rragc	chr4	123917432	123936997	+	7.73752	8.60563	8.43685	12.8696	13.5404	192
Fhl3	chr4	124700698	124708611	+	2.64494	2.49865	2.05228	5.35309	4.99884	193
Grik3	chr4	125490830	125714173	+	1.62686	1.34401	1.32885	5.04011	5.81814	194
Csf3r	chr4	126024658	126044975	+	0.595387	0.578895	0.767094	0.132217	0.147706	195
C77080	chr4	129219577	129261404	-	8.08036	7.61688	7.69057	11.7787	13.1975	196
Khdrbs1	chr4	129703168	129742303	-	19.9883	21.4037	19.5209	27.2145	26.7204	197
Fabp3	chr4	130308777	130315463	+	36.4034	35.7572	36.4721	69.4233	59.7199	198
Lin28a	chr4	134003329	134018816	-	18.4552	20.5184	18.073	36.8088	33.6672	199
Slc30a2	chr4	134343045	134354484	+	1.43819	1.58853	1.08531	5.07602	4.62557	200
Myom3	chr4	135759714	135815567	+	0.857445	0.681748	0.841868	0.116483	0.0649483	201
Id3	chr4	136143821	136145392	+	3.45987	4.22192	2.82457	9.80569	10.302	202
Tcea3	chr4	136247956	136274899	+	23.6666	25.1452	23.2723	16.3056	14.6859	203
Hspg2	chr4	137468802	137570630	+	6.44317	5.48568	5.00735	12.2597	13.5003	204
Spata21	chr4	141088344	141112759	+	0.547901	0.452623	0.625492	0.0456269	0.0216245	205
Fblim1	chr4	141576061	141606052	-	36.0105	37.2545	38.8314	51.0024	50.1111	206
Mthfr	chr4	148039076	148059562	+	2.09755	2.11483	2.0061	3.21457	3.63108	207
Camta1	chr4	151059522	151861768	-	1.12586	1.07137	1.17371	0.557891	0.586408	208
Phf13	chr4	151989630	151996179	-	7.1413	7.26179	8.19725	4.72864	4.43008	209
Kcnab2	chr4	152390739	152477549	-	0.72333	0.785544	0.701353	0.237486	0.129318	210
Agrn	chr4	156165289	156197488	-	11.8831	10.9052	11.3406	17.8566	16.4325	211
Cdk6	chr5	3344311	3522225	+	9.20508	9.49872	9.44231	16.0695	14.8726	212
Cyp51	chr5	4080673	4104697	-	17.172	18.0102	18.6688	25.1333	24.6806	213
Steap2	chr5	5664828	5694568	-	0.921923	0.77845	0.811035	0.369048	0.364735	214
Dpp6	chr5	26817356	27727500	+	0.429	0.439031	0.35201	1.06581	0.945353	215
En2	chr5	28165695	28172166	+	0.921973	1.05595	1.06102	2.09633	2.44799	216
Dnajb6	chr5	29735897	29786478	+	54.7688	54.0067	53.175	31.779	29.1159	217
Ept1	chr5	30232617	30272430	+	2.04479	2.05908	2.25539	0.474293	0.47901	218
Yes1	chr5	32611170	32687066	+	55.3372	57.7459	59.2518	42.7322	37.2699	219
Trmt44	chr5	35556208	35575070	-	5.2665	5.3972	4.93284	8.08542	8.00869	220
Acox3	chr5	35583059	35613801	+	3.00878	3.24858	2.68202	6.27985	6.42876	221
Afap1	chr5	35893318	36003922	+	1.34432	1.20584	1.22932	2.65987	3.34797	222
Cd38	chr5	43868826	43912374	+	2.7523	2.9192	3.08337	5.81916	5.67313	223
Rell1	chr5	63908897	63968897	-	7.39768	8.47265	7.76228	13.3358	13.7924	224
Uchl1	chr5	66676120	66687234	+	26.03	25.2949	27.4596	15.4613	13.3763	225
C330024D21Rik	chr5	67463897	67477899	+	1.63773	1.29857	1.4346	0.592877	0.436017	226
Gc	chr5	89417510	89457898	-	1.43974	1.33041	1.27952	3.42758	4.69847	227
Bmp2k	chr5	96997688	97091048	+	0.639935	0.646191	0.4936	1.76029	2.18704	228
Hnrnpdl	chr5	100033578	100039222	-	85.2938	86.0196	81.8511	106.141	106.162	229
Agpat9	chr5	100846228	100899102	+	3.58305	4.05388	3.84497	0.763871	0.554063	230
Wdfy3	chr5	101832952	102069921	-	6.60615	6.45917	6.11316	9.67215	9.05387	231
Hsd17b11	chr5	103989764	104021796	-	6.52588	7.27432	5.87482	11.0004	12.666	232
Spp1	chr5	104435110	104441053	+	162.046	159.149	162.175	218.302	224.765	233
Pkd2	chr5	104459456	104505819	+	3.79229	4.3419	4.03747	7.39177	7.50004	234
Brdt	chr5	107331193	107387058	+	1.14649	0.712854	1.11438	0.0874689	0.0901198	235
Ankrd13a	chr5	114775139	114805820	+	12.6294	12.7326	12.7303	17.9348	18.7435	236
Mlec	chr5	115142980	115158176	-	34.526	37.0739	35.1834	49.1236	49.1107	237
Msi1	chr5	115429684	115454202	+	11.4588	11.6134	13.1622	19.0361	19.2119	238
Pla2g1b	chr5	115466265	115474717	+	83.626	77.0412	86.3527	50.5101	42.3318	239
Wsb2	chr5	117357304	117378589	+	7.53862	8.29801	8.01271	12.6501	13.1568	240
Dtx1	chr5	120680263	120711669	-	1.95066	2.01527	1.86698	3.56481	3.47166	241
Oas1g	chr5	120876141	120887613	-	3.31864	3.38878	3.43774	1.27462	0.96305	242
Oas1a	chr5	120896256	120907525	-	8.05083	8.29954	9.21013	3.75521	2.7056	243
Aacs	chr5	125475872	125517403	+	3.4258	3.96998	3.84544	6.87794	7.59844	244
Fzd10	chr5	128601105	128604093	+	7.61535	7.5509	7.2596	11.8894	12.749	245
Tpst1	chr5	130073325	130135733	+	9.16308	8.59432	9.89227	4.85924	5.27595	246
Cldn4	chr5	134945123	134946934	-	5.19194	4.81836	4.16617	13.7495	14.3232	247
Mlxipl	chr5	135106890	135138382	+	2.06538	1.63766	2.18075	0.340409	0.203529	248
Rasa4	chr5	136083915	136111861	+	5.55623	5.70744	5.71586	2.58297	2.61613	249
Pcolce	chr5	137605106	137611404	-	21.7543	20.7824	20.1462	32.7938	29.6487	250
Pdgfa	chr5	138976971	138994953	-	9.16517	9.55567	8.58888	18.8473	20.9433	251
Radil	chr5	142484838	142551098	-	2.69661	2.63952	2.84637	1.39434	1.14865	252
Tnrc18	chr5	142724604	142817387	-	5.33146	5.7154	4.84432	12.8048	13.6283	253
Actb	chr5	142903117	142906754	-	415.712	417.396	398.767	546.037	580.879	254
Zfp655	chr5	145231714	145247306	+	9.93156	10.8703	11.199	15.0643	16.0931	255
Slc7a1	chr5	148327409	148399904	-	15.076	14.0335	14.8305	18.8514	19.7506	256
Wdr95	chr5	149528678	149611894	+	0.620438	0.649794	0.569974	0.0846941	0.0510873	257
Peg10	chr6	4747305	4760516	+	3.06566	3.37192	2.55257	7.17559	9.04346	258
Asns	chr6	7675170	7693182	-	181.647	176.63	185.583	221.863	245.306	259
Ndufa4	chr6	11900372	11907446	-	57.4434	57.1412	55.9497	79.9748	85.8946	260
Phf14	chr6	11925880	12081198	+	5.85595	6.33673	6.04445	8.53744	8.71606	261
Capza2	chr6	17637097	17666536	+	61.0369	62.8977	61.7348	80.549	84.952	262
Cttnbp2	chr6	18366476	18514825	-	0.67201	0.787153	0.516798	1.8978	1.90884	263
Impdh1	chr6	29200436	29216364	-	7.87051	7.35658	7.26195	4.43801	4.39914	264
Calu	chr6	29348105	29376675	+	37.7261	37.9856	39.0153	50.2567	53.6808	265
Ccdc136	chr6	29398925	29426995	+	7.50411	8.61724	8.98834	4.37928	3.13922	266
Mest	chr6	30733505	30748466	+	9.99456	9.26782	9.72154	17.7888	15.5114	267
Stra8	chr6	34920959	34939342	+	13.4475	14.9582	21.0392	1.64176	1.4317	268
Nup205	chr6	35177615	35247598	+	18.6927	19.3482	19.4401	24.9523	26.4149	269
Mtpn	chr6	35508823	35539888	-	17.9285	18.934	19.692	25.4123	26.1359	270
Atp6v0a4	chr6	38048482	38124586	-	0.73901	0.697674	0.849332	0.1338	0.137855	271
D630045J12Rik	chr6	38123173	38254009	-	1.99499	1.90814	2.40006	1.14103	1.06175	272
Cul1	chr6	47454323	47526139	+	33.3356	34.2439	33.1164	44.5458	44.5823	273
Gpnmb	chr6	49036517	49058182	+	0.200343	0.183266	0.237973	0.628952	1.15419	274
Igf2bp3	chr6	49085217	49214954	-	18.7919	19.6558	19.3183	28.3903	27.6733	275
Stk31	chr6	49395603	49469502	+	2.23243	1.99233	2.45755	0.74953	0.704872	276
Osbpl3	chr6	50293326	50456170	-	0.995312	1.06487	1.12762	0.347205	0.397021	277
Cbx3	chr6	51470615	51483704	+	81.0382	83.2924	81.8406	103.521	109.408	278
Skap2	chr6	51859164	52012549	-	16.514	17.4532	18.3895	28.7292	32.1611	279
Halr1	chr6	52102948	52113684	+	3.42133	3.48084	3.71056	11.3767	20.9159	280
Gars	chr6	55038000	55079504	+	90.1745	85.6579	89.3544	117.195	124.54	281
Tigd2	chr6	59208869	59212033	+	3.70529	3.68102	3.78329	6.34248	7.19262	282
Mad2l1	chr6	66535467	66540991	+	33.0723	34.7014	33.9659	45.4764	48.4722	283
Gadd45a	chr6	67035095	67037407	-	2.64943	3.64778	3.32287	7.13505	9.84139	284
0610030E20Rik	chr6	72347316	72353160	+	2.92042	2.70734	2.91714	4.28471	4.76501	285
Tgoln1	chr6	72608420	72617000	-	12.989	12.3203	12.9176	16.2801	18.7919	286
Hk2	chr6	82725026	82774454	-	31.6378	31.3782	32.0662	39.3228	44.8596	287
Slc4a5	chr6	83237374	83304945	+	8.09669	7.4911	8.20212	2.22652	1.70748	288
Exoc6b	chr6	84618485	85069513	-	19.1758	19.0333	18.8717	25.7845	26.7882	289
Rab11fip5	chr6	85334961	85374634	-	4.33986	3.71747	3.45224	7.18656	8.60153	290
Dusp11	chr6	85942268	85961667	-	7.33513	7.27989	6.82834	14.3875	17.2047	291
Pcyox1	chr6	86386005	86397150	-	4.00249	4.10274	4.15769	5.96327	6.60229	292
Tia1	chr6	86404218	86433405	+	4.25136	4.61246	4.11987	8.13766	9.49949	293
Nfu1	chr6	87009835	87028461	+	43.7269	41.9174	39.5229	56.6498	60.924	294
Hmces	chr6	87913975	87936613	+	12.9921	15.4806	13.0151	24.1898	27.3449	295
Rab7	chr6	87999105	88045270	-	37.2423	34.5232	35.7221	48.8976	53.1816	296
4933427D06Rik	chr6	89096114	89110037	+	0.67048	0.479313	0.697173	0.0947847	0.0691114	297
Klf15	chr6	90462625	90475209	+	0.59231	0.710447	0.668076	1.93267	2.67684	298
Slc6a6	chr6	91684066	91759063	+	20.4133	19.9956	18.9157	27.4151	26.0304	299
Trh	chr6	92242060	92244650	-	18.5357	22.2758	14.722	86.9618	71.8936	300
Uba3	chr6	97183631	97205647	-	20.8436	22.5248	21.6266	31.2394	33.7258	301
Frmd4b	chr6	97286866	97617657	-	2.69464	2.58921	2.71536	6.83615	8.38889	302
Mitf	chr6	97807057	98021358	+	6.04942	6.04907	6.47733	10.7803	10.6138	303
Bhlhe40	chr6	108660628	108666925	+	2.22313	2.30683	2.27221	6.13265	6.51711	304
Prrt3	chr6	113493638	113501931	-	3.47192	3.6558	3.69031	1.40257	1.09405	305
Tamm41	chr6	115004380	115037874	-	11.2181	12.1574	11.3407	22.7977	21.7649	306
Fam21	chr6	116208032	116262671	+	22.354	21.6269	21.3218	33.675	36.4558	307
Hnrnpf	chr6	117900339	117925622	+	119.45	120.699	120.564	149.685	158.144	308
Adipor2	chr6	119353149	119417483	-	20.7088	20.9264	21.0662	28.6096	28.4121	309
Fbxl14	chr6	119479667	119483886	+	5.68538	5.46845	5.63043	8.44756	8.94327	310
Bid	chr6	120893118	120916820	-	5.7579	5.37761	5.31989	11.9956	12.5678	311
A2m	chr6	121636172	121679238	+	6.69052	4.72121	5.72917	1.13736	1.03155	312
Rimklb	chr6	122453608	122486305	-	13.0971	13.7775	14.2043	6.27012	6.58366	313
Pex5	chr6	124396815	124415067	-	5.44828	5.63822	6.2441	8.68163	8.5272	314
Atn1	chr6	124742543	124756487	-	7.19149	7.6851	7.17815	12.3242	14.3644	315
Ptms	chr6	124913674	124917946	-	55.6522	49.8278	47.7853	84.6468	97.3299	316
Zfp384	chr6	125009237	125037870	+	9.63203	9.58973	9.35685	12.9301	13.7194	317
Tuba3a	chr6	125278273	125286042	-	24.5519	22.2531	28.5805	5.69883	4.33346	318
Vwf	chr6	125552947	125686679	+	1.0295	0.859022	0.938598	1.82361	2.18993	319
Tigar	chr6	127085115	127109552	-	13.4996	13.3983	13.3337	18.4038	18.2827	320
Tead4	chr6	128227142	128300813	-	4.27005	3.53222	3.31517	6.64131	8.32094	321
Smim10l1	chr6	133105238	133110899	+	4.67807	5.27035	4.61426	9.31773	9.8774	322
Cdkn1b	chr6	134920400	134925525	+	4.30132	4.57419	4.86101	7.59635	8.38294	323
Emp1	chr6	135362930	135383173	+	0.529348	0.32326	0.25157	1.1732	2.21817	324
Rerg	chr6	137054824	137170496	-	2.68658	2.34871	1.83486	6.49395	8.36396	325
Eps8	chr6	137477244	137649285	-	8.52252	8.3336	9.09967	6.09772	5.00192	326
C2cd5	chr6	143010919	143100152	-	8.16921	8.26831	7.89327	13.3597	14.594	327
Etnk1	chr6	143167229	143208547	+	27.8256	24.9374	26.0705	44.5644	48.7537	328
Bcat1	chr6	144993834	145076157	-	47.2262	46.3916	45.2235	67.5126	74.4931	329
Klhl42	chr6	147091074	147112778	+	1.63219	1.61732	1.64757	3.66148	4.1929	330
AU018091	chr7	3154658	3169203	-	30.312	29.5468	31.6435	20.0744	18.6447	331
Tnni3	chr7	4518307	4522443	-	4.37529	4.53262	4.74515	1.46108	1.58278	332
Shisa7	chr7	4825551	4844696	-	1.33606	1.41308	1.48172	0.703067	0.714673	333
Nlrp4c	chr7	6045160	6105149	+	0.93742	0.958288	1.16889	0.0951802	0.0551342	334
Zscan5b	chr7	6222277	6239412	+	6.64312	5.86297	6.30661	0.669677	0.331187	335
Peg3	chr7	6705959	6730419	-	33.8213	35.8705	38.0122	61.6605	54.1618	336
Usp29	chr7	6730582	6967219	+	1.11466	1.13046	1.40782	0.468822	0.37385	337
Aurkc	chr7	6995384	7003091	+	9.67572	9.82242	11.778	1.08973	1.05812	338
Ube2m	chr7	13035119	13038275	-	11.2724	11.8415	11.5984	16.7564	18.3222	339
Obox6	chr7	15833249	15839679	-	14.4555	10.8646	14.2068	1.91673	0.96265	340
Crxos	chr7	15882616	15904030	+	1.72192	1.15581	1.66881	0.193226	0.0915778	341
Arhgap35	chr7	16494472	16614993	-	10.823	11.0218	11.0028	13.8686	14.0199	342
Vasp	chr7	19256929	19271854	-	18.1168	19.0357	18.2255	27.9392	31.4804	343
Apoe	chr7	19696243	19699188	-	79.7435	80.784	72.5846	180.835	209.82	344
Bcam	chr7	19756137	19770532	-	14.4136	12.6955	12.7424	20.825	25.3462	345
Bcl3	chr7	19808461	19822755	-	9.04358	9.79747	9.51897	14.6111	15.9424	346
Zfp428	chr7	24507086	24515682	+	36.4846	36.0289	34.3164	20.8233	15.6634	347
Atp1a3	chr7	24978168	25005937	-	1.5005	1.13241	1.43621	0.308055	0.352414	348
Ltbp4	chr7	27305140	27337612	-	3.96659	3.58651	3.63467	5.56736	6.72763	349
Ryr1	chr7	29003339	29125151	-	0.904542	0.859777	0.943915	0.497593	0.423314	350
Clip3	chr7	30291752	30308367	+	2.30028	2.17611	2.60786	0.880221	1.08685	351
Kirrel2	chr7	30447765	30457515	-	2.62873	2.74064	2.27195	5.11112	5.14644	352
Lsr	chr7	30957769	30973469	-	3.53681	3.15828	3.34842	1.65907	1.47276	353
Uri1	chr7	37959991	38019552	-	25.3614	24.7395	25.7574	18.8719	18.4448	354
Atf5	chr7	44812255	44816658	-	1.61806	1.89955	1.34078	5.06278	6.67122	355
Rcn3	chr7	45082913	45092213	-	5.49862	6.0289	6.84241	1.8676	1.22173	356
Fcgrt	chr7	45092992	45103822	-	6.74428	6.53477	6.68132	1.46239	1.18815	357
Tead2	chr7	45215752	45233619	+	25.1384	24.438	24.7858	18.1444	16.9384	358
Dhdh	chr7	45473562	45488796	-	7.9203	7.81872	7.60671	4.72517	4.67738	359
Fut2	chr7	45648590	45666394	-	1.43323	1.33749	1.49016	3.10484	3.04369	360
Otog	chr7	46240986	46311434	+	0.295843	0.175802	0.197598	0.0228339	0.00901826	361
Ldha	chr7	46845803	46855627	+	104.467	81.1189	97.5389	26.7145	32.305	362
Cyfip1	chr7	55842070	55932633	+	13.6473	12.8929	13.2755	18.0446	17.4706	363
Atp10a	chr7	58658201	58829426	+	1.61988	2.16051	2.055	0.842115	0.559751	364
Snurf	chr7	59982500	60005156	-	38.2281	32.7218	35.658	54.1985	50.1331	365
Snrpn	chr7	59982501	60140219	-	31.712	27.1628	29.5467	45.0532	41.7994	366
Trpm1	chr7	64153834	64269759	+	0.498311	0.6284	0.350708	2.58063	3.26239	367
Aldh1a3	chr7	66390892	66427477	-	0.06927	0.0399453	0.0809047	0.46651	0.463507	368
Igf1r	chr7	67952256	68233667	+	4.30005	4.09324	4.54709	2.9324	3.01246	369
Fam169b	chr7	68273838	68363092	+	4.00098	3.82142	4.16507	1.32097	1.08518	370
Arrdc4	chr7	68736993	68749238	-	2.55605	2.12048	2.64792	4.14575	4.52051	371
1810026B05Rik	chr7	73539797	73558395	-	5.74185	5.43665	5.85284	8.36414	8.73477	372
Fam174b	chr7	73740306	73776919	+	1.01476	1.11572	1.00516	0.256894	0.257033	373
Acan	chr7	79053482	79115099	+	0.825169	0.588588	0.737311	0.137707	0.177323	374
Sema4b	chr7	80186840	80226524	+	11.7121	12.4077	11.7063	17.2988	16.333	375
Cpeb1	chr7	81347025	81454758	-	1.40792	1.66278	1.77301	0.613682	0.331568	376
Ctsc	chr7	88278092	88310875	+	6.69119	5.17131	5.19026	10.5832	12.208	377
Tenm4	chr7	96210636	96908554	+	5.52039	5.24007	5.40683	7.81261	7.21463	378
Serpinh1	chr7	99345374	99353239	-	14.6476	15.8167	15.4276	26.3897	25.6221	379
Arrb1	chr7	99535485	99606771	+	0.876289	0.797276	0.776317	0.335877	0.292902	380
Pold3	chr7	100082112	100121500	-	35.4671	35.8649	36.672	27.3728	26.966	381
Inppl1	chr7	101822631	101838226	-	12.9974	12.1762	12.5963	5.98877	5.60556	382
Tpp1	chr7	105744846	105752207	-	10.6191	10.2473	9.26179	17.3216	19.7057	383
A730082K24Rik	chr7	114948649	114983967	+	0.307064	0.501492	0.475745	1.72129	2.41229	384
Rps13	chr7	116331506	116334190	-	506.118	520.912	526.418	649.808	712.487	385
Eef2k	chr7	120842830	120907219	+	1.55109	1.52932	1.4862	3.97794	3.85963	386
Arhgap17	chr7	123279148	123369915	-	9.40718	10.3357	9.5281	13.682	14.0101	387
Aldoa	chr7	126795233	126800447	-	268.444	243.203	262.085	192.316	195.551	388
Mvp	chr7	126986859	127014594	-	7.69157	8.18629	8.25787	4.93733	4.99588	389
Mylpf	chr7	127211607	127214287	+	83.9611	86.7725	86.9989	123.798	117.346	390
Sept1	chr7	127214441	127218445	-	48.4402	47.5302	44.9625	69.851	78.216	391
Zfp553	chr7	127233442	127237860	+	25.69	28.046	25.0718	35.948	37.9017	392
Prss8	chr7	127925716	127930113	-	0.584412	0.447237	0.528179	1.85964	1.75298	393
Tacc2	chr7	130577483	130764784	+	10.4784	9.55553	9.94054	14.7538	14.4445	394
Fank1	chr7	133776890	133881532	+	1.92732	1.12662	1.86131	0.174256	0.17435	395
Dock1	chr7	134670686	135173647	+	9.06769	11.1476	10.7914	15.2095	14.8341	396
Mki67	chr7	135689787	135716379	-	35.9063	35.6924	35.8174	45.077	47.9434	397
Bnip3	chr7	138890835	138909506	-	9.20283	7.62793	10.0255	1.6977	1.91869	398
Nkx6-2	chr7	139579375	139582797	-	0.323005	0.338288	0.3194	2.71569	2.78313	399
Syce1	chr7	140777228	140787854	-	4.29995	4.48223	4.91879	1.7254	2.10629	400
B4galnt4	chr7	141061273	141072119	+	5.70635	5.55503	5.45469	9.50887	10.6351	401
Cd81	chr7	143052749	143067930	+	30.9226	29.9497	30.3914	41.6066	50.7266	402
C330021F23Rik	chr8	3567997	3584776	+	2.27996	2.10507	2.59391	0.778078	0.759875	403
Ccl25	chr8	4325209	4360020	+	9.22903	7.54225	7.7421	3.03001	2.03321	404
Sox1	chr8	12395518	12399555	+	0.0762906	0.0967215	0.0778728	0.468639	0.673052	405
Lamp1	chr8	13159134	13175338	+	66.1443	67.2595	67.5186	99.8469	98.9005	406
Sfrp1	chr8	23411501	23449632	+	25.298	20.3783	19.873	35.6281	37.0402	407
Zmat4	chr8	23669660	24063116	+	0.569494	0.525633	0.496896	1.75247	1.90517	408
Plekha2	chr8	25039143	25101811	-	8.02081	8.73527	8.90774	6.02628	5.46148	409
Rab11fip1	chr8	27138772	27174646	-	5.94339	5.42872	5.82171	3.51731	2.75862	410
Adrb3	chr8	27225775	27229588	-	8.95144	8.15126	9.21606	3.42545	2.30072	411
Tex15	chr8	33570543	33585585	+	4.89334	4.58945	5.22988	2.40467	2.67359	412
Mtmr7	chr8	40550158	40634792	-	8.75872	10.0353	11.3465	6.03913	5.24078	413
Slc7a2	chr8	40862366	40922070	+	0.726331	0.691429	0.867755	0.301597	0.189049	414
Asah1	chr8	41340642	41374697	-	41.1913	40.2283	40.859	50.946	54.4871	415
Fat1	chr8	44950207	45052257	+	20.3066	20.7256	19.5475	31.1964	32.1315	416
Dctd	chr8	48099091	48141667	+	8.94125	8.52495	8.4832	4.75006	3.77377	417
Tll1	chr8	64014769	64205993	-	0.382335	0.427174	0.330927	1.24091	1.2424	418
Cpe	chr8	64592550	64693040	-	0.553712	0.681015	0.487923	3.29452	4.05707	419
Msmo1	chr8	64718144	64733578	-	36.5415	32.548	37.433	70.9922	76.3989	420
Zfp930	chr8	69209045	69230539	+	4.75293	4.62384	4.67597	7.30979	7.02556	421
Uba52	chr8	70508265	70510367	-	381.479	398.197	398.932	489.976	491.5	422
Jak3	chr8	71676382	71690577	+	2.57227	3.05872	2.5348	6.33416	5.58277	423
Adgrl1	chr8	83900097	83941954	+	8.83934	8.14419	8.57632	5.92113	4.76745	424
Dnase2a	chr8	84908623	84911461	+	9.30649	9.49581	9.99754	16.9118	15.4901	425
Prdx2	chr8	84969647	84974313	+	77.5444	80.5223	78.5722	136.935	120.972	426
Neto2	chr8	85636587	85691009	-	1.80013	2.15291	2.30378	1.07972	1.06195	427
Zfp423	chr8	87661809	87959595	-	0.81963	0.698859	0.640661	1.84986	2.09307	428
Mt2	chr8	94172617	94173567	+	440.896	517.271	498.628	732.678	817.317	429
Herpud1	chr8	94386499	94395358	+	2.64344	2.6132	3.24496	5.17841	5.85731	430
Slc38a7	chr8	95835922	95853491	-	4.90732	4.6761	4.87914	7.30165	7.87041	431
D030068K23Rik	chr8	109075221	109253639	+	0.655298	0.558658	0.662602	0.083155	0.0936001	432
Phlpp2	chr8	109868602	109944671	+	2.43342	2.13534	2.17841	1.00092	0.937214	433
Tmem231	chr8	111912017	111933791	-	18.7067	16.6357	18.4641	9.04865	9.09155	434
Gabarapl2	chr8	111940702	111952915	+	90.9906	82.6143	90.2618	51.2072	54.1389	435
Cdyl2	chr8	116568723	116732991	-	15.1417	14.4513	15.7536	7.89735	8.38619	436
Atmin	chr8	116943392	116960445	+	17.0358	17.5093	17.1625	22.6758	22.6937	437
Slc7a5	chr8	121881145	121907686	-	24.5476	23.636	24.5757	35.2282	35.1608	438
Rhou	chr8	123653928	123663880	+	0.581114	0.62522	0.671088	1.49838	2.04436	439
Sipa1l2	chr8	125418062	125492710	-	3.74005	3.46469	3.53762	5.85461	6.15566	440
Itgb1	chr8	128685653	128733579	+	13.2485	13.0058	13.8016	17.8479	18.2177	441
Maml2	chr9	13619988	13709533	+	1.27192	1.71178	1.52667	3.48333	3.01557	442
A230050P20Rik	chr9	20868641	20874307	+	5.94204	5.77996	6.75957	2.65701	2.33557	443
Pde4a	chr9	21165713	21213248	+	1.3781	1.3841	1.43712	0.439826	0.264981	444
Slc44a2	chr9	21320718	21355028	+	4.49389	4.11185	4.15721	7.02795	6.52047	445
Dock6	chr9	21800179	21852635	-	13.5903	14.0938	14.853	9.83178	9.34146	446
Elavl3	chr9	22015004	22052023	-	1.21091	0.962476	1.1882	0.0950371	0.126118	447
Acp5	chr9	22126726	22135746	-	3.20631	3.07808	4.04881	1.2062	1.03125	448
Pigyl	chr9	22156845	22158354	+	22.8623	21.4236	23.3448	10.6474	10.6954	449
Jam3	chr9	27097383	27155421	-	8.01001	7.27328	7.49028	19.2362	23.015	450
Igsf9b	chr9	27299227	27334763	+	2.74554	2.64424	2.67987	4.29182	4.31978	451
AI414108	chr9	27352684	27357543	+	3.05737	2.86498	2.95998	5.12853	5.12592	452
St14	chr9	31088589	31131799	-	5.0377	4.76295	4.47552	10.2805	10.8179	453
Ei24	chr9	36779152	36797393	-	56.1138	53.9536	56.0375	36.5936	34.0855	454
Fez1	chr9	36843658	36878640	+	7.3172	5.52239	6.88072	2.46869	1.88894	455
Sorl1	chr9	41968488	42124289	-	3.18571	3.18589	3.12934	7.91616	9.03093	456
Sc5d	chr9	42254176	42264300	-	6.63772	6.09924	6.7358	10.9528	10.9136	457
Pvrl1	chr9	43744575	43807461	+	4.0701	2.98544	3.47853	6.876	8.34658	458
Arcn1	chr9	44742143	44767808	-	51.0678	52.9153	53.0077	69.5595	68.886	459
Mpzl2	chr9	45042343	45054043	+	10.8723	9.38577	9.89745	16.3707	17.5621	460
Plet1	chr9	50494524	50505639	+	5.26034	5.28799	4.84288	8.84073	9.52805	461
Exph5	chr9	53301669	53381158	+	0.222662	0.173286	0.225113	0.529453	0.639587	462
Rab39	chr9	53684109	53706232	-	1.54276	1.50854	1.65334	0.3795	0.487757	463
Slc35f2	chr9	53771534	53818161	+	21.2138	23.5546	25.3943	16.1334	13.6138	464
Nrg4	chr9	55220221	55283625	-	2.02968	1.95479	2.2726	0.475769	0.263068	465
Cd276	chr9	58524299	58540940	-	2.7872	2.82501	3.23873	0.990003	0.790536	466
Neo1	chr9	58874679	59036441	-	11.2439	11.4282	10.6275	18.5978	17.8443	467
Hexa	chr9	59539666	59565105	+	14.542	14.8012	14.6335	24.4588	28.4581	468
Tle3	chr9	61372365	61418497	+	13.6416	13.7361	13.2159	20.2746	22.7244	469
Megf11	chr9	64385625	64709205	+	1.07919	0.970319	1.08449	0.380414	0.371515	470
Tcf12	chr9	71844251	72111819	-	6.36826	7.28581	6.61542	9.48518	11.2743	471
Arpp19	chr9	75037613	75060313	+	7.91569	7.89759	7.15562	11.4393	11.1582	472
Tmod3	chr9	75497783	75559657	-	10.7086	10.2522	10.5028	16.9489	16.4591	473
Elovl5	chr9	77917364	77984519	+	16.2862	14.3579	14.42	25.2327	25.8261	474
Ooep	chr9	78376902	78378588	-	50.4778	49.6643	53.1496	28.0239	27.2237	475
Ddx43	chr9	78395776	78423589	+	5.21606	4.83403	4.96321	2.03299	2.22224	476
Tbx18	chr9	87702799	87731260	-	0.228444	0.333802	0.193165	1.84607	2.88803	477
Nt5e	chr9	88327608	88372089	+	0.54654	0.573795	0.367719	2.33805	2.66651	478
Trim43a	chr9	88581035	88588819	+	0.937415	0.859933	0.652802	0.104085	0.0690624	479
1190002N15Rik	chr9	94517863	94538081	-	5.20112	5.49702	5.31747	12.0901	9.72658	480
Zbtb38	chr9	96685422	96731675	-	7.69664	7.79328	8.22721	11.225	12.2473	481
Slc25a36	chr9	97077010	97111041	-	32.2859	31.8348	31.029	46.923	48.0695	482
Mras	chr9	99385419	99436712	-	3.63953	3.26735	2.99207	8.78248	11.0293	483
Dzip1l	chr9	99629594	99669256	+	1.42517	1.12804	1.10046	0.301635	0.364311	484
Stag1	chr9	100643622	100958544	+	16.6096	17.0445	17.1538	25.6603	26.7914	485
Amotl2	chr9	102717803	102733417	+	8.88764	8.27165	7.59021	11.6275	13.7617	486
Hyal1	chr9	107576951	107580133	+	3.32349	3.06752	3.11662	5.93071	6.99578	487
Nat6	chr9	107580169	107584048	+	5.50395	5.59943	5.19234	9.90892	10.4079	488
Sema3b	chr9	107597673	107609241	-	0.208288	0.135431	0.202845	0.838475	0.743774	489
Epm2aip1	chr9	111271844	111279091	+	3.70985	3.72003	3.55171	7.03805	7.84352	490
Tmppe	chr9	114401094	114411201	+	11.0772	10.1846	10.8215	7.09938	6.28286	491
Cmtm7	chr9	114756835	114781993	-	13.958	12.6766	11.7509	23.8161	27.211	492
Gpd1l	chr9	114899338	114933987	-	5.09728	5.30209	5.84573	2.67097	2.68021	493
Eomes	chr9	118478188	118486132	+	0.512049	0.598641	0.380801	2.12963	2.40383	494
Xylb	chr9	119357380	119393797	+	3.98041	3.98172	4.06005	2.51246	2.06732	495
Rpsa	chr9	120127765	120132369	+	310.692	334.983	332.226	406.569	440.16	496
Plekhg1	chr10	3740376	3967302	+	4.14677	3.50572	3.42135	5.67322	5.99568	497
Ccdc170	chr10	4509871	4561111	+	3.40269	3.10175	3.05092	1.37706	1.03581	498
Plagl1	chr10	13090787	13131695	+	25.2829	20.0907	23.2709	36.0588	40.687	499
Akap7	chr10	25169089	25299163	-	2.97595	2.40273	2.61096	4.49145	4.85478	500
Ptprk	chr10	28074819	28597397	+	8.36768	8.0445	8.03808	12.6349	12.7007	501
Marcks	chr10	37133242	37138926	-	9.08868	9.65232	9.11068	12.9607	14.0075	502
Cep57l1	chr10	41718839	41809868	-	11.4378	11.6071	12.3635	6.3807	5.66871	503
P4ha1	chr10	59323295	59373304	+	3.83127	4.16545	4.66057	1.39438	1.60845	504
Adamts14	chr10	61197111	61273438	-	0.666982	0.814805	0.992261	0.151024	0.139661	505
Vps26a	chr10	62454842	62486805	-	17.9218	19.8271	18.9112	26.6436	24.9208	506
Rufy2	chr10	62980222	63018742	+	4.58799	4.60895	4.88348	2.81433	2.54805	507
Mypn	chr10	63115794	63203952	-	4.13032	3.45942	4.56937	0.211282	0.20027	508
Herc4	chr10	63243796	63317881	+	33.4419	31.5894	34.3104	23.5154	23.15	509
Jmjd1c	chr10	67127257	67256326	+	24.6208	25.0353	23.8735	32.0452	34.2684	510
Arid5b	chr10	68095592	68278726	-	26.8002	28.185	25.7211	43.2294	44.999	511
Slc16a9	chr10	70245275	70285951	+	0.691519	0.70518	0.634171	1.97376	1.86072	512
Zfp280b	chr10	76032611	76042969	+	13.7047	13.8628	13.9239	20.6157	18.4263	513
Lss	chr10	76531604	76557139	+	4.0762	3.93504	4.09171	5.91509	6.07333	514
Pcbp3	chr10	76761853	76961947	-	4.2564	3.55145	4.51684	1.24765	1.17429	515
Sumo3	chr10	77606096	77618331	+	14.7139	15.3692	14.5486	21.3231	20.403	516
Pfkl	chr10	77986948	78009796	-	11.0787	8.95195	10.4717	4.2621	4.83919	517
Cstb	chr10	78425669	78427622	+	23.4435	23.0963	23.8586	35.3631	39.2973	518
Gpx4	chr10	80047165	80056439	+	85.8952	84.8837	97.9724	55.3868	54.3659	519
Zbtb7a	chr10	81136270	81151657	+	3.64831	3.46928	3.15952	5.35281	5.90318	520
1500009L16Rik	chr10	83722864	83762762	+	12.0323	11.3178	12.7697	3.61715	2.95833	521
Nt5dc3	chr10	86779004	86838389	+	3.196	3.14035	3.11626	6.23838	6.4854	522
Spic	chr10	88675269	88683023	-	11.801	12.7627	11.9443	4.95502	3.37939	523
Elk3	chr10	93247415	93311159	-	0.556254	0.477145	0.422294	1.93177	1.81825	524
Socs2	chr10	95411489	95416857	-	6.82904	7.86543	7.47916	11.2266	11.1921	525
Btg1	chr10	96617000	96622811	+	3.81292	3.95943	4.04108	7.23114	8.37342	526
Dusp6	chr10	99263230	99267489	+	1.0234	1.06218	0.948344	3.81245	4.33261	527
Atxn7l3b	chr10	112925427	112929026	-	5.6681	5.4152	5.9125	10.1099	11.5006	528
Cand1	chr10	119198811	119240055	-	37.1605	37.3244	41.3334	29.4903	26.839	529
Irak3	chr10	120141653	120201537	-	4.16765	4.15698	3.67288	8.72794	7.22977	530
Ctdsp2	chr10	126978716	126999975	+	12.5798	12.6228	12.6657	16.5294	17.1985	531
Cdk4	chr10	127063602	127067282	+	84.877	85.6026	86.3152	113.397	108.886	532
Erbb3	chr10	128569367	128589501	-	4.78157	4.34976	4.82409	2.71439	2.92439	533
Dgka	chr10	128720135	128744056	-	5.82854	6.0532	6.32824	9.92528	10.6701	534
Pes1	chr11	3963974	3980004	+	52.7882	51.7875	55.003	33.4869	33.092	535
Sec14l2	chr11	4097039	4118729	-	1.46195	1.42368	1.88089	0.279696	0.27945	536
Sf3a1	chr11	4160353	4182541	+	37.0038	36.799	38.8009	28.564	27.9044	537
Gatsl3	chr11	4218250	4222409	+	14.6994	15.1233	15.9166	4.88862	2.99561	538
Hormad2	chr11	4346382	4441082	-	11.2909	10.3403	11.9236	1.84982	2.25246	539
Mtmr3	chr11	4480867	4594815	-	10.5846	11.0406	11.6629	7.68579	7.81517	540
Nefh	chr11	4938755	4948064	-	6.75295	5.89848	6.51169	1.20156	1.11171	541
Ccdc117	chr11	5528887	5542217	-	14.6649	16.0832	16.3033	9.00718	8.21818	542
Mrps24	chr11	5703982	5707699	-	21.3731	21.4274	23.2384	12.3162	10.577	543
Urgcp	chr11	5713416	5762376	-	1.02353	1.26168	1.52676	0.517685	0.42291	544
Camk2b	chr11	5969665	6065748	-	4.10084	4.04247	4.05134	1.65137	1.86967	545
Ppia	chr11	6415869	6419810	+	527.75	552.966	552.341	424.965	386.819	546
Hus1	chr11	8993136	9011191	-	13.2894	14.1161	15.4197	9.36295	8.62508	547
Upp1	chr11	9118007	9136170	+	82.3415	80.4511	95.5096	46.8271	44.3038	548
Fignl1	chr11	11800287	11808962	-	45.5356	47.431	50.7393	35.7012	33.7127	549
Pno1	chr11	17203199	17211589	-	64.2027	64.5507	64.8908	47.5979	43.147	550
Spred2	chr11	19924441	20022597	+	15.7891	17.2841	17.548	11.0455	11.5231	551
Cep68	chr11	20227036	20249424	-	9.84182	11.1143	11.6542	5.77275	5.46812	552
Aftph	chr11	20685084	20741556	-	8.559	8.59119	9.36025	5.75428	5.67828	553
Lgalsl	chr11	20823354	20831108	-	6.3795	6.46844	7.31878	3.48555	3.17433	554
Ugp2	chr11	21321125	21371267	-	8.4506	8.77861	9.87484	4.833	4.26558	555
Cct4	chr11	22990592	23003336	+	162.415	174.189	187.918	119.734	113.697	556
Fam161a	chr11	23013386	23023741	+	3.4232	3.48825	3.59086	1.50947	1.42145	557
Xpo1	chr11	23256040	23297597	+	148.122	156.8	165.979	113.75	103.462	558
Usp34	chr11	23306894	23490560	+	41.0746	44.7852	46.3732	33.0338	30.984	559
Papolg	chr11	23862645	23895270	-	11.8789	12.6965	13.2485	8.63101	8.50842	560
Mtif2	chr11	29526396	29545447	+	17.1188	17.0097	18.9224	12.2859	10.7886	561
Rtn4	chr11	29692897	29744414	+	61.9673	66.4112	68.3921	42.624	37.4902	562
Nprl3	chr11	32231962	32267707	-	2.92716	3.06068	3.18687	1.58555	1.62157	563
Npm1	chr11	33152497	33163206	-	1415.59	1502	1455.61	1153.01	1092.86	564
Dock2	chr11	34226820	34783905	-	1.121	1.02136	1.47301	0.226366	0.16375	565
Spdl1	chr11	34809184	34833641	-	15.3163	15.6646	17.386	10.8189	9.33128	566
Hmmr	chr11	40701387	40733437	-	35.2245	35.3154	37.4241	25.9553	27.3192	567
Pttg1	chr11	43420247	43426248	-	40.4552	38.0951	41.4558	20.6714	22.0746	568
Ccnjl	chr11	43528748	43586999	+	1.5649	1.49776	1.41433	3.9504	3.71777	569
Rnf145	chr11	44518963	44565520	+	6.45959	6.78828	6.82372	4.30929	3.9402	570
Ebf1	chr11	44618099	45008096	+	0.394657	0.420832	0.40219	3.81125	3.68745	571
Cyfip2	chr11	46193848	46312859	-	1.95885	1.64236	2.02101	0.804749	0.932892	572
Rnf130	chr11	50025330	50125719	+	2.29774	2.22768	2.79868	0.871605	0.874778	573
Hnrnph1	chr11	50377718	50386528	+	158.444	172.909	169.906	124.894	111.85	574
Skp1a	chr11	52231994	52246858	+	155.949	179.435	178.767	121.679	108.049	575
Hspa4	chr11	53259813	53300479	-	180.008	186.294	191.122	126.308	124.226	576
Zcchc10	chr11	53324688	53333301	+	19.4427	18.7055	17.6631	11.6758	10.952	577
Sept8	chr11	53519735	53544096	+	3.61396	3.6764	4.25493	1.49097	1.73429	578
Kif3a	chr11	53567368	53604246	+	3.53028	3.17418	3.76021	1.61296	1.84797	579
Rad50	chr11	53649518	53707319	-	14.8998	14.0611	16.1251	4.85076	5.54003	580
Slc22a5	chr11	53864541	53891703	-	2.3864	2.15968	2.51219	1.07706	0.851741	581
Anxa6	chr11	54978961	55033471	-	16.9117	16.4217	18.3635	11.3756	8.76093	582
Gm2a	chr11	55097984	55113028	+	6.12974	5.22545	6.46787	2.64919	2.49409	583
Fat2	chr11	55250609	55312257	-	0.494905	0.396669	0.508133	0.0410741	0.0326538	584
G3bp1	chr11	55469751	55500887	+	117.486	121.929	127.249	95.0806	87.6223	585
Larp1	chr11	58009063	58062032	+	46.8078	45.9924	48.0143	36.7092	32.7039	586
Gemin5	chr11	58120000	58168539	-	27.493	26.0142	27.5753	16.8989	14.651	587
Zfp39	chr11	58888152	58904225	-	4.44303	4.77443	4.74791	2.30893	2.00698	588
Hist3h2a	chr11	58954684	58955192	+	74.4286	68.5753	86.6381	42.2077	37.7258	589
Mrpl55	chr11	59202485	59206135	+	22.8751	22.0797	24.3883	14.3511	13.7794	590
Snap47	chr11	59407149	59449956	-	16.3317	14.8604	16.247	7.90618	8.0266	591
Nlrp3	chr11	59542685	59566956	+	0.554181	0.236433	0.620575	0.0285154	0.00900974	592
Mprip	chr11	59662494	59780860	+	10.5578	10.0384	10.9291	7.76455	7.03406	593
Cops3	chr11	59817803	59839767	-	73.2769	73.8043	73.7626	53.0103	48.7206	594
Shmt1	chr11	60788896	60811265	-	49.3934	46.9923	52.1892	34.0187	31.1931	595
Usp22	chr11	61151780	61175059	-	26.7306	24.8498	26.8936	17.0192	15.1454	596
Mfap4	chr11	61485443	61488704	+	1.13754	0.875205	1.15578	0.151567	0.119723	597
Epn2	chr11	61517248	61579687	-	23.7387	23.9543	25.3515	15.4107	13.5341	598
Prpsap2	chr11	61729649	61762088	-	27.6652	28.0521	28.099	12.6923	11.5651	599
Akap10	chr11	61871306	61930257	-	13.9133	13.1078	14.2335	8.51799	8.59707	600
Ncor1	chr11	62316425	62457332	-	47.2411	45.7811	46.0123	35.3478	33.5218	601
Tvp23b	chr11	62879489	62895184	+	9.04802	9.00311	9.50941	5.40067	5.5648	602
Elac2	chr11	64979034	65002076	+	18.3187	18.4296	18.2706	13.4341	12.6362	603
Ntn1	chr11	68209363	68386826	-	4.40132	5.02083	3.67763	8.81567	7.73432	604
Myh10	chr11	68691914	68816624	+	13.6242	12.0842	13.2714	5.49509	5.13655	605
Rpl26	chr11	68901565	68904534	+	725.872	644.616	722.499	476.168	437.607	606
Gm15772	chr11	68901588	68904534	+	757.978	673.062	754.456	497.229	456.963	607
Pfas	chr11	68985700	69008460	-	33.0278	32.738	33.7744	25.3691	23.1937	608
Ctc1	chr11	69015910	69036473	+	17.5603	16.6427	18.2903	12.5612	12.5064	609
Dnah2	chr11	69420808	69549108	-	0.450804	0.346868	0.547697	0.126898	0.107067	610
Trp53	chr11	69580358	69591873	+	112.367	112.793	113.146	79.0694	74.4345	611
Fxr2	chr11	69632970	69653297	+	41.3331	36.8287	40.8115	22.2436	22.0845	612
Eif4a1	chr11	69666935	69672423	-	649.323	644.565	677.531	486.839	446.821	613
Senp3	chr11	69673109	69682084	-	69.2478	65.2046	67.1819	46.4424	44.3788	614
Acadvl	chr11	70010182	70015428	-	5.36548	4.6011	5.14555	2.48047	2.08627	615
Pelp1	chr11	70392880	70410031	-	41.005	37.7486	38.6854	21.0488	19.8307	616
Arrb2	chr11	70432579	70440828	+	9.04016	8.76163	8.90498	4.68139	3.83603	617
Psmb6	chr11	70525356	70527858	+	111.324	99.8776	108.578	65.0037	57.0524	618
Mink1	chr11	70562880	70614482	+	8.5635	7.48784	8.06063	4.32912	3.79174	619
Rabep1	chr11	70844760	70943105	+	17.1905	16.2632	18.0324	10.3756	10.4051	620
Nup88	chr11	70943057	70969973	-	62.942	64.3801	67.5276	39.763	36.8346	621
C1qbp	chr11	70977845	70983026	-	146.645	139.574	145.735	98.8474	88.8756	622
Dhx33	chr11	70984090	71004432	-	12.7367	12.4629	12.8004	9.09195	8.32779	623
Derl2	chr11	71007439	71019841	-	7.38802	7.34814	7.90377	4.93163	4.66588	624
Smtnl2	chr11	72390113	72411713	-	27.4651	25.5686	28.6787	14.8569	14.4623	625
Mybbp1a	chr11	72441377	72451550	+	154.774	147.084	151.645	109.341	99.8717	626
Ube2g1	chr11	72607260	72686481	+	21.5919	21.8879	22.4391	15.3149	13.837	627
E130309D14Rik	chr11	74619604	74641516	+	2.4717	2.36283	2.64137	1.33226	1.20851	628
Cluh	chr11	74649494	74670847	+	21.4086	20.7029	21.4497	16.1935	15.4468	629
Pafah1b1	chr11	74673948	74724384	-	34.3591	35.5368	36.4937	26.0009	23.3407	630
Mettl16	chr11	74770862	74818692	+	25.8287	25.4464	26.1182	17.95	17.3877	631
Smg6	chr11	74925871	75164448	+	14.1335	14.2161	15.1623	9.51054	9.44594	632
Rpa1	chr11	75300258	75348383	-	66.051	64.7477	71.4258	40.0721	38.6893	633
Smyd4	chr11	75348432	75405705	+	5.3521	4.85601	5.99448	3.09717	2.75033	634
Prpf8	chr11	75486776	75509447	+	96.1853	92.9965	96.7574	69.0476	64.5046	635
Pitpna	chr11	75588107	75628778	+	16.1423	14.4595	15.8783	10.3881	10.0856	636
Ywhae	chr11	75732886	75765841	+	294.123	275.517	286.148	211.581	210.666	637
Gemin4	chr11	76210570	76217572	-	20.6388	20.2756	21.5687	12.5645	10.0289	638
Glod4	chr11	76220394	76243699	-	24.8666	24.8763	26.2444	18.2087	16.8936	639
Cpd	chr11	76777207	76847008	-	3.98482	3.89916	4.26586	2.5558	2.49979	640
Blmh	chr11	76945655	76987389	+	38.426	36.1305	38.9294	26.1211	24.3367	641
Ccdc55	chr11	77044291	77078437	-	11.1282	10.2972	10.7889	6.83203	6.86545	642
Ssh2	chr11	77216424	77460219	+	3.59301	2.89113	3.25959	1.62517	1.63188	643
Taok1	chr11	77529161	77607815	-	26.9657	26.4344	28.3189	19.3934	19.6249	644
Nufip2	chr11	77686138	77717966	+	48.7179	47.004	47.7745	30.9484	29.9991	645
Supt6	chr11	78206748	78245703	-	30.5861	29.9235	30.3992	22.5555	22.8318	646
2610507B11Rik	chr11	78261753	78290625	+	48.3942	46.024	48.9768	33.8348	31.6212	647
Spag5	chr11	78301590	78322454	+	19.5056	17.6652	19.6174	13.055	13.1045	648
Sarm1	chr11	78472329	78497754	-	1.3121	1.27227	1.61706	0.440375	0.368315	649
Tmem97	chr11	78541816	78550735	-	25.2249	23.9432	25.6474	17.1173	14.7304	650
Ksr1	chr11	79014800	79146354	-	5.24281	4.89625	5.67638	2.1634	2.41462	651
Nf1	chr11	79339891	79581609	+	10.5364	10.4236	10.9859	7.64273	7.77956	652
Rab11fip4	chr11	79591211	79694012	+	14.8851	13.6893	15.4937	8.40964	8.02895	653
Utp6	chr11	79933955	79962387	-	44.5642	45.0579	45.6057	28.0406	25.8679	654
Suz12	chr11	79993105	80034123	+	139.867	138.322	144.475	71.8255	64.1263	655
Crlf3	chr11	80046492	80080991	-	26.5173	26.1099	27.9553	15.5209	14.145	656
Atad5	chr11	80089399	80135791	+	18.2214	19.4023	18.4243	13.2446	12.4472	657
Tefm	chr11	80136677	80142153	-	21.4248	22.7544	24.2741	10.6612	9.41595	658
Rnf135	chr11	80183871	80199753	+	5.17886	4.76631	5.10514	2.45826	1.74761	659
Rhot1	chr11	80209054	80267907	+	17.1352	16.0881	18.3447	11.8539	12.0428	660
Psmd11	chr11	80428614	80472133	+	70.2844	71.6666	73.0808	50.9163	45.9971	661
Cct6b	chr11	82719247	82764321	-	1.26711	1.03329	1.16442	0.193855	0.193423	662
Zfp830	chr11	82764344	82767622	+	8.5444	8.22942	9.0629	5.84728	5.38228	663
Lig3	chr11	82781108	82804274	+	15.9352	15.9134	17.1935	9.23658	8.50946	664
Rffl	chr11	82803818	82871210	-	6.38913	7.07564	7.00798	3.41476	2.99766	665
Rad51d	chr11	82871960	82890624	-	1.7094	1.56437	1.58869	0.944962	0.862799	666
Slfn9	chr11	82980302	82991830	-	2.96465	2.99382	2.99106	1.41244	0.963015	667
Slfn3	chr11	83191329	83215154	+	2.61376	3.64588	3.12685	0.484065	0.448862	668
AI662270	chr11	83223575	83226584	+	35.0241	44.8533	36.4916	17.2642	15.6568	669
Ap2b1	chr11	83302696	83405033	+	25.0868	25.5232	26.4011	19.905	18.4758	670
Synrg	chr11	83964430	84044576	+	4.37249	4.36238	4.81949	2.76303	2.58845	671
Tada2a	chr11	84078919	84129568	-	34.0106	32.263	32.9728	24.5301	22.9268	672
Usp32	chr11	84984487	85139955	-	13.4227	12.4628	13.4536	9.10792	8.81113	673
Appbp2	chr11	85191309	85235120	-	34.6366	33.8476	35.7427	24.3147	21.5109	674
Bcas3	chr11	85353163	85826058	+	11.0058	10.8333	11.1999	5.36817	4.6177	675
Brip1	chr11	86058135	86201193	-	5.77239	5.15938	5.61136	3.03479	2.97329	676
Ints2	chr11	86210682	86257568	-	17.2143	16.1913	17.6476	10.336	9.83703	677
Med13	chr11	86265714	86357525	-	21.9931	21.4877	22.9172	13.8004	13.7373	678
Dhx40	chr11	86768848	86807660	-	29.9433	29.7366	30.5751	17.4833	16.5576	679
Ypel2	chr11	86936424	86993762	-	5.68043	4.58531	5.08242	2.45601	2.78252	680
Smg8	chr11	87077731	87086777	-	13.7184	12.5072	13.6458	8.71552	8.8574	681
Trim37	chr11	87127074	87220686	+	26.8714	27.1742	28.3797	18.6897	16.8833	682
Rad51c	chr11	87377606	87404954	-	6.03528	5.80406	6.43282	3.20039	2.80402	683
Tex14	chr11	87405064	87555823	+	13.1132	12.42	14.0931	6.39608	6.06644	684
Scpep1	chr11	88924019	88955442	-	63.9241	60.9574	64.0606	45.3058	42.2022	685
Gm15698	chr11	88964665	88966917	-	25.1535	20.5563	23.0643	11.6168	13.4013	686
Trim25	chr11	88999402	89020293	+	32.1171	30.029	31.9077	21.8548	21.0186	687
Dgke	chr11	89037581	89060748	-	14.4433	14.1147	15.4907	8.71108	8.31968	688
Tom1l1	chr11	90645690	90687601	-	11.3825	10.6987	12.3635	7.39568	6.8631	689
Utp18	chr11	93859242	93885766	-	32.7253	33.2908	33.3261	23.1617	22.1279	690
Mbtd1	chr11	93886218	93946984	+	24.3577	25.6517	25.3764	17.3017	16.2892	691
Nme2	chr11	93949813	93956256	-	78.2061	80.9593	80.3594	58.7863	56.2808	692
Spag9	chr11	93996090	94126082	+	13.3232	14.0716	14.7097	8.5526	8.00671	693
Tob1	chr11	94211453	94215492	+	22.6123	19.8669	23.1222	13.3561	14.1266	694
Ankrd40	chr11	94328000	94341847	+	14.0245	13.5435	14.8654	9.04973	8.9728	695
Acsf2	chr11	94557101	94601786	-	22.798	19.8145	21.825	6.05868	6.49841	696
Lrrc59	chr11	94629823	94645216	+	107.091	98.3063	110.136	68.0676	60.5388	697
Eme1	chr11	94645001	94653754	-	19.2226	17.9673	19.2514	13.4577	12.2197	698
Xylt2	chr11	94663846	94677493	-	5.37577	4.51688	4.95224	2.83525	2.72981	699
Kat7	chr11	95271852	95310246	-	39.1488	39.5166	41.1771	26.8393	27.2015	700
Fam117a	chr11	95337017	95381872	+	9.49235	9.11483	9.88774	5.67446	5.36308	701
Spop	chr11	95414082	95493410	+	12.3649	11.5161	12.3126	7.55252	7.8377	702
Zfp652	chr11	95749066	95764713	+	21.3866	21.971	23.7549	14.3057	13.3494	703
Igf2bp1	chr11	95957163	96005944	-	89.877	93.4075	92.8774	70.7968	64.0985	704
Snf8	chr11	96034916	96047405	+	29.5569	27.7149	29.6488	16.4262	15.1301	705
Ube2z	chr11	96047430	96065364	-	26.3455	27.6951	28.6566	18.8648	17.6856	706
Calcoco2	chr11	96098915	96111962	-	99.0842	87.7954	93.4964	30.8266	26.1578	707
Ttll6	chr11	96133785	96165452	+	6.82628	6.2008	6.74145	2.01472	1.82497	708
Cbx1	chr11	96789135	96808640	+	75.9511	80.1531	78.1767	53.5502	50.0483	709
Copz2	chr11	96849875	96861202	+	9.59468	8.29649	9.13677	2.4479	1.46239	710
Cdk5rap3	chr11	96907424	96916514	-	16.8073	16.221	17.3449	9.98035	10.1867	711
Mrpl10	chr11	97041585	97049213	+	14.1207	13.3634	14.6486	8.77109	8.37857	712
Tbx21	chr11	97098006	97115331	-	1.10745	0.705146	1.11638	0.112324	0.056784	713
Tbkbp1	chr11	97136170	97149712	-	2.05342	1.65949	1.77335	0.527174	0.564877	714
Kpnb1	chr11	97159709	97187892	-	193.11	191.579	194.298	147.357	137.04	715
Npepps	chr11	97205855	97280576	-	39.1429	37.471	38.6655	29.4842	27.5976	716
Mrpl45	chr11	97315715	97329920	+	27.9018	26.3206	28.0216	20.242	18.9635	717
Mllt6	chr11	97663411	97685458	+	27.4106	26.7761	26.9904	19.2126	19.295	718
Psmb3	chr11	97703433	97713500	+	66.2712	60.3591	61.7671	40.1547	37.3433	719
Plxdc1	chr11	97923236	97986446	-	2.91864	3.08562	3.21271	1.11832	1.10368	720
Arl5c	chr11	97989579	97996173	-	1.43913	1.00055	1.28387	0.220359	0.13925	721
Rpl19	chr11	98026709	98030493	+	527.322	530.56	546.198	401.929	415.139	722
Stac2	chr11	98036623	98053462	-	1.24185	1.32518	1.69482	0.238171	0.261404	723
Fbxl20	chr11	98082553	98149616	-	3.1426	2.78113	3.46989	1.49426	1.45005	724
Med1	chr11	98152154	98193293	-	19.1385	19.1578	19.4955	13.3914	12.6052	725
Psmd3	chr11	98682553	98695978	+	50.0806	47.1348	48.8782	36.0928	33.2331	726
Med24	chr11	98704590	98729435	-	15.3754	15.4832	15.4824	10.4573	10.4329	727
Msl1	chr11	98795768	98807859	+	13.0992	13.8004	13.3509	9.03105	7.74648	728
Casc3	chr11	98809807	98833807	+	19.942	20.4292	19.9371	14.3964	13.5928	729
Wipf2	chr11	98863597	98905578	+	9.53464	9.23665	9.30762	6.08883	5.90516	730
Cdc6	chr11	98907888	98923942	+	16.8913	17.2512	17.0695	10.8498	10.1032	731
Top2a	chr11	98992946	99024189	-	188.887	175.703	188.901	134.642	136.423	732
Jup	chr11	100368855	100397790	-	11.2339	10.3067	9.26517	15.9855	16.3819	733
Cnp	chr11	100574938	100581739	+	3.1931	2.59279	3.03749	0.991896	1.12283	734
Dnajc7	chr11	100582835	100620168	-	95.0112	89.3922	90.9838	61.8763	56.4498	735
Tubg1	chr11	101120130	101126419	+	29.0612	27.5173	27.1461	17.4235	18.4631	736
Ezh1	chr11	101191114	101226463	-	8.60407	8.51863	9.17729	4.72414	3.98708	737
Vps25	chr11	101253706	101259547	+	25.8372	23.7074	26.6606	15.7472	14.5937	738
Becn1	chr11	101288266	101302267	-	24.5749	23.2793	24.5241	15.4781	14.5198	739
Psme3	chr11	101316250	101323530	+	69.7831	69.1385	69.643	49.7635	44.7146	740
Aarsd1	chr11	101406839	101417433	-	17.4236	17.5116	17.6879	9.53353	8.76488	741
Ifi35	chr11	101448411	101458701	+	5.70146	6.15407	6.3279	3.09133	1.99788	742
Brca1	chr11	101488763	101551955	-	44.0138	44.878	46.7445	30.5336	27.3319	743
Nbr1	chr11	101552106	101581951	+	31.5852	31.2811	33.6084	19.5084	18.7599	744
Rdm1	chr11	101627948	101636081	+	12.5728	12.5238	13.9757	5.16912	4.65225	745
Dhx8	chr11	101732955	101767357	+	19.4174	18.746	19.4663	13.2416	13.1262	746
Etv4	chr11	101769741	101785310	-	1.02372	1.10465	0.605598	7.93526	8.97175	747
Hdac5	chr11	102195746	102230172	-	5.35808	5.41215	5.79327	2.97488	2.62339	748
Gpatch8	chr11	102475915	102556158	-	14.0631	13.4889	13.7501	9.67116	9.34219	749
Gm1564	chr11	102665584	102682238	+	5.05861	4.06522	5.3875	0.755718	0.75195	750
Ccdc43	chr11	102684687	102697725	-	53.2823	51.0847	53.6218	31.9744	28.7768	751
Gjc1	chr11	102799477	102819686	-	28.2973	28.2809	30.4055	19.6493	16.6867	752
Eftud2	chr11	102838471	102880975	-	86.0887	81.364	85.5021	57.0263	53.2281	753
Dcakd	chr11	102994055	103017147	-	38.2313	34.2407	38.4024	25.2311	24.751	754
Nmt1	chr11	103028561	103066105	+	65.7349	60.9426	62.5153	42.6805	40.052	755
Plcd3	chr11	103070295	103101658	-	2.33109	2.01637	2.25589	0.857462	0.872536	756
Arhgap27	chr11	103331483	103363692	-	0.702001	0.784563	0.887071	0.220788	0.296213	757
Nsf	chr11	103821782	103954056	-	28.9917	26.6352	27.9094	18.4705	18.5327	758
Cdc27	chr11	104502525	104550620	-	30.8038	30.6746	32.5879	24.4157	23.7179	759
Itgb3	chr11	104607999	104670471	+	0.880916	0.666849	0.747988	0.211636	0.166127	760
Tlk2	chr11	105178806	105283959	+	18.1579	17.1552	17.8872	13.1083	12.9269	761
Map3k3	chr11	106084901	106155434	+	9.21085	8.4695	9.58392	5.44961	5.19435	762
Ccdc47	chr11	106199355	106216367	-	30.6289	30.0106	31.6068	22.4958	21.9941	763
Ftsj3	chr11	106249143	106255802	-	70.1464	67.7706	67.826	46.8447	46.7742	764
Psmc5	chr11	106256184	106263112	+	71.5308	68.9439	69.069	48.2316	47.8456	765
Smarcd2	chr11	106263170	106272972	-	16.1403	16.2548	16.813	11.6299	10.9164	766
Tex2	chr11	106502138	106612930	-	18.6777	17.784	19.6602	9.24182	7.46995	767
Pecam1	chr11	106654212	106715281	-	30.3577	25.05	29.5284	15.0277	15.3913	768
Smurf2	chr11	106820063	106920715	-	7.79249	8.09189	8.01263	5.46668	5.58611	769
Kpna2	chr11	106988628	106999525	-	136.951	129.8	140.642	105.03	103.076	770
Bptf	chr11	107033080	107131922	-	38.4477	38.839	39.6882	24.726	21.9945	771
Nol11	chr11	107166660	107189381	-	38.4523	39.2291	41.4106	27.0504	26.2024	772
Psmd12	chr11	107479527	107498036	+	87.5451	90.1846	93.2124	63.0865	60.2401	773
Slc39a11	chr11	113244854	113565815	-	7.32071	6.71764	6.9507	3.83316	3.45502	774
Sdk2	chr11	113780789	114065951	-	0.548661	0.478145	0.517686	0.0954924	0.0932585	775
Rpl38	chr11	114668542	114672331	+	252.407	254.421	260.273	180.639	175.496	776
Cdr2l	chr11	115381915	115396132	+	4.83277	4.81313	5.06607	2.26738	2.2716	777
Ict1	chr11	115403765	115410913	+	30.0877	29.8134	31.1053	19.5006	17.4971	778
Nt5c	chr11	115490425	115491814	-	11.7399	11.6346	11.3882	6.06103	5.38466	779
Hn1	chr11	115497352	115514370	-	50.7883	46.6798	49.3088	28.834	25.197	780
Sumo2	chr11	115523108	115536230	-	146.804	148.963	152.697	109.509	108.467	781
Nup85	chr11	115564443	115583924	+	27.557	26.853	28.6306	18.5082	18.8608	782
Gga3	chr11	115584254	115603916	-	14.1253	12.932	14.4653	9.12154	9.06935	783
Grb2	chr11	115644143	115708597	-	25.308	23.4747	25.0007	17.448	16.5456	784
Galk1	chr11	116008356	116012719	-	14.0507	11.5771	12.7857	7.72777	6.87998	785
H3f3b	chr11	116021960	116024504	-	167.105	158.932	173.049	122.609	121.409	786
Mrpl38	chr11	116131816	116138868	-	19.4906	18.5409	19.6344	11.3089	11.9263	787
Prpsap1	chr11	116470815	116490346	-	25.7883	25.8195	26.5378	18.1791	14.9044	788
Ube2o	chr11	116537752	116581447	-	14.1563	13.3407	14.494	7.28774	6.96722	789
St6galnac2	chr11	116676704	116694660	-	7.32513	8.5844	9.22976	3.31818	2.82448	790
Syngr2	chr11	117809666	117814286	+	22.0872	19.8953	23.4516	14.1068	11.874	791
Socs3	chr11	117966086	117969366	-	6.15199	5.62775	5.56124	13.4486	14.869	792
Eif4a3	chr11	119288362	119300043	-	59.898	59.8305	58.0316	38.9124	36.5996	793
Slc38a10	chr11	120103950	120151351	-	11.9049	11.874	12.1019	7.27263	6.26447	794
Nploc4	chr11	120379797	120437700	-	16.7479	16.0273	17.3752	11.9433	11.5335	795
P4hb	chr11	120560303	120572936	-	160.074	161.473	163.681	122.408	102.804	796
Gps1	chr11	120784271	120789102	+	43.8354	44.8478	46.5069	32.6006	28.7061	797
Dus1l	chr11	120789201	120796395	-	20.1761	20.0982	19.885	13.8045	12.9237	798
Fasn	chr11	120805957	120824547	-	59.4291	59.6355	61.9797	46.4156	41.3555	799
Slc16a3	chr11	120948483	120959000	+	3.0511	2.44407	3.30902	0.35595	0.393632	800
Tex19.1	chr11	121146142	121148313	+	20.5546	20.0226	21.0267	6.7583	6.91648	801
Tbcd	chr11	121451948	121617170	+	16.3199	14.3599	15.1631	10.532	9.9646	802
Dnmt3a	chr12	3806979	3914443	+	10.4217	9.20604	10.9886	3.25449	2.83721	803
Efr3b	chr12	3962553	4038915	-	0.841225	0.741614	0.78329	0.245188	0.232409	804
Atad2b	chr12	4917352	5047410	+	19.691	20.0255	20.565	15.2347	15.0668	805
Lpin1	chr12	16535668	16589770	-	6.58533	6.06121	6.05064	10.7984	13.7098	806
Greb1	chr12	16670614	16800886	-	0.114052	0.117152	0.0666043	0.347035	0.50658	807
1700030C10Rik	chr12	20804391	20815779	-	13.5561	12.2205	12.5252	21.2938	20.3101	808
Sox11	chr12	27334267	27342718	-	3.21562	3.48936	3.12475	5.99239	6.2095	809
Adi1	chr12	28675206	28682174	+	7.79833	8.49343	8.87985	13.5197	14.1344	810
Lamb1	chr12	31265293	31329639	+	8.45011	7.10155	7.26694	3.29746	3.52062	811
Etv1	chr12	38780257	38868215	+	1.32991	1.98591	1.47025	4.75602	4.91993	812
Hectd1	chr12	51743721	51829536	-	16.6091	17.2922	17.742	23.1796	23.7954	813
Baz1a	chr12	54892988	54986336	-	5.30984	5.36859	5.78096	3.40202	3.41233	814
Ralgapa1	chr12	55602889	55821516	-	4.69574	5.00837	4.72092	6.90446	6.58341	815
L2hgdh	chr12	69690435	69724874	-	6.133	5.69621	6.29239	3.73843	3.12574	816
Ppm1a	chr12	72761210	72794940	+	32.0568	35.0309	35.8727	24.482	21.6927	817
4930447C04Rik	chr12	72881108	72917765	-	5.94723	6.48849	6.62486	2.48131	2.33302	818
Six1	chr12	73041826	73046712	-	4.99817	5.02926	5.33103	1.90497	1.61494	819
Syne2	chr12	75818317	76110928	+	11.1263	11.952	11.715	16.9111	16.7562	820
Gpx2	chr12	76792334	76795554	-	6.1974	7.31893	6.94227	15.2236	14.0567	821
Zfp36l1	chr12	80107759	80113013	-	8.31162	8.79559	7.3286	17.3809	18.9154	822
Galnt16	chr12	80518989	80603896	+	1.34951	1.16932	1.45357	0.409501	0.337329	823
Mfsd7c	chr12	85746538	85813585	+	1.56643	1.51728	1.41857	3.05984	3.13239	824
Esrrb	chr12	86361116	86521628	+	60.0351	60.2984	58.9108	77.6189	82.2876	825
Ism2	chr12	87278637	87299705	-	3.52151	3.86446	3.94366	1.62655	1.56329	826
Eml5	chr12	98786603	98901484	-	3.64981	3.40339	3.64237	2.31146	2.38221	827
Itpk1	chr12	102568582	102704869	-	11.4943	10.0814	10.2438	25.0318	30.3487	828
Serpina3m	chr12	104387163	104394257	+	5.08886	5.67938	6.08753	0.748737	0.807982	829
Clmn	chr12	104763113	104865076	-	0.910481	0.811089	0.891627	0.328558	0.287478	830
Meg3 (Gtl2)	chr12	109540995	109571729	+	3.5196	2.90764	2.34154	15.0125	12.0742	831
Mir1906-1	chr12	109544540	109544620	+	3.73658	4.24418	2.45603	17.4379	17.3216	832
Mir1906-2	chr12	109544540	109544620	+	3.73658	4.24418	2.45603	17.4379	17.3216	833
6430411K18Rik	chr12	109591536	109592851	+	2.74163	2.65947	1.73323	22.5688	18.059	834
Mir433	chr12	109591714	109591838	+	2.33765	2.87509	2.85217	29.4357	21.7661	835
Mir432	chr12	109594955	109595030	+	7.00515	4.75349	3.66768	54.2726	49.7534	836
Mir136	chr12	109595326	109595388	+	1.46103	2.46436	1.58454	23.117	21.62	837
Rian	chr12	109603944	109661711	+	22.7637	21.0893	18.2209	129.931	110.334	838
AF357425	chr12	109636011	109636080	+	6.82661	11.0718	4.84088	47.6367	44.1039	839
AF357426	chr12	109642837	109642904	+	4.86719	7.85491	7.91796	45.9212	37.0393	840
DQ267100	chr12	109649616	109649687	+	5.86881	4.54307	3.87431	34.1828	28.8295	841
AF357359	chr12	109650708	109650738	+	102.058	101.86	107.411	652.927	493.307	842
AF357355	chr12	109654626	109654697	+	12.5031	7.17327	7.47188	68.0964	59.9551	843
Mir668	chr12	109734731	109734797	+	4.66644	3.3439	2.97701	25.4801	26.8967	844
Mirg	chr12	109734980	109749457	+	2.44067	2.11719	1.34619	15.9913	14.7395	845
Klf6	chr13	5861488	5870393	+	3.13617	3.46217	3.38731	5.23408	5.49823	846
Idi1	chr13	8885605	8892396	+	19.9367	21.9922	21.9304	29.1817	29.2214	847
Ryr2	chr13	11553102	12106945	-	0.809237	0.786586	0.800516	1.23665	1.29825	848
Aoah	chr13	20794112	21024254	+	4.98481	4.85734	4.21782	10.3785	9.82055	849
Dcdc2a	chr13	25056003	25210706	+	0.0495733	0.0190038	0.0317696	0.979272	0.770525	850
Tfap2a	chr13	40715302	40734920	-	0.21705	0.134152	0.16528	0.779406	0.844985	851
Gcnt2	chr13	40859767	40960892	+	7.27348	7.37049	7.14863	10.0152	10.2061	852
Rnf144b	chr13	47122719	47247991	+	0.389816	0.401452	0.25115	1.06257	1.09981	853
Id4	chr13	48261426	48264036	+	2.25914	2.75105	1.82279	5.53731	5.39058	854
Sema4d	chr13	51701247	51793747	-	7.11674	6.40364	7.14758	4.57985	4.32522	855
Ror2	chr13	53109316	53286109	-	2.82476	2.84371	2.81114	5.40569	6.6616	856
Simc1	chr13	54503804	54551290	+	2.93694	2.75566	3.16061	1.55496	1.51549	857
Golm1	chr13	59634995	59675784	-	13.9077	12.4441	11.7049	19.4826	22.2245	858
Gm10324	chr13	66113452	66122836	+	11.3324	11.6361	11.6866	7.01698	5.5097	859
Ice1	chr13	70588688	70637634	-	11.1462	10.4913	11.1618	14.2	14.555	860
Arrdc3	chr13	80883421	80896043	+	12.7836	13.5399	13.2446	17.7083	18.0565	861
Lhfpl2	chr13	94057795	94195409	+	1.51251	1.46418	1.48673	3.13813	2.67879	862
F2rl1	chr13	95511729	95525240	-	6.71162	6.73279	5.86026	13.5143	12.2776	863
Hmgcr	chr13	96648961	96670936	-	28.3693	30.6501	29.6853	42.8316	42.5783	864
Enc1	chr13	97241104	97253040	+	12.3261	12.5563	12.349	21.1125	23.331	865
Foxd1	chr13	98354244	98356705	+	0.117785	0.103475	0.0878224	0.675569	2.12717	866
Pik3r1	chr13	101680760	101768217	-	3.4275	3.18876	3.34899	5.04549	5.57224	867
Cd180	chr13	102693557	102706631	+	0.163565	0.160571	0.15205	0.961254	0.856642	868
Erbb2ip	chr13	103818785	103920586	-	7.34295	7.71647	7.67179	11.5423	11.3974	869
Trim23	chr13	104179097	104202048	+	7.16502	8.00594	7.58614	12.6338	12.924	870
Elovl7	chr13	108214403	108287107	+	2.15589	2.21381	1.98759	6.24232	6.26014	871
Pde4d	chr13	108654176	109955969	+	1.60118	1.58472	1.49961	2.44806	2.56974	872
Mier3	chr13	111686177	111718594	+	14.7557	15.2588	15.7015	11.0633	10.9845	873
Ccno	chr13	112987801	112990778	+	1.77691	1.99087	2.44032	0.458397	0.154491	874
Fst	chr13	114452261	114458951	-	0.81687	0.860408	0.583748	6.11175	8.19914	875
Paip1	chr13	119428599	119460323	+	7.91193	8.04028	7.80183	12.0972	12.5881	876
Kctd6	chr14	8214080	8223569	+	6.04425	6.16747	5.74734	8.88997	9.1129	877
Kcnk5	chr14	20140057	20181782	-	10.3294	10.7745	11.6523	5.6978	4.70622	878
Il17rd	chr14	27039000	27107286	+	6.8544	6.60275	6.54225	9.77356	9.01958	879
Nt5dc2	chr14	31134852	31139124	+	12.7717	11.3419	13.7538	7.21032	6.06372	880
Ogdhl	chr14	32322018	32347820	+	11.9553	12.4138	11.6386	16.2898	17.4313	881
Cdhr1	chr14	37077848	37098311	-	2.05413	2.07476	1.93561	0.63049	0.370362	882
Sh2d4b	chr14	40815867	40892965	-	3.81627	4.16559	3.50212	9.14216	8.3582	883
Tspan14	chr14	40906443	40966807	-	8.24621	8.4678	8.08627	12.7195	12.3272	884
Dlgap5	chr14	47387778	47418407	-	32.3767	31.0553	34.0862	24.3131	23.8649	885
Atg14	chr14	47540892	47568434	-	15.2504	13.6119	14.8828	8.42814	8.90745	886
Ndrg2	chr14	51905270	51913488	-	2.25935	1.74726	2.28638	0.815079	0.621438	887
Pck2	chr14	55540265	55550017	+	4.78496	4.77346	4.3284	8.85808	11.2201	888
Rec8	chr14	55618165	55625395	+	4.11705	3.70101	4.99095	1.76687	2.03618	889
Tgm1	chr14	55700008	55713492	-	3.39916	2.80122	2.35309	6.11573	7.26733	890
Nynrin	chr14	55854114	55874736	+	14.0037	12.598	12.4124	21.8839	23.7905	891
Rcbtb1	chr14	59201227	59237265	+	12.2357	12.0399	13.114	16.4465	17.1998	892
Dleu2	chr14	61602835	61682373	-	6.51306	6.30364	5.61379	10.6154	10.383	893
Nefl	chr14	68083883	68087737	+	12.5577	10.8597	9.13188	36.3005	28.09	894
Nefm	chr14	68119544	68125004	-	1.75559	1.16682	0.833379	12.8741	15.6297	895
A230070E04Rik	chr14	68123751	68131371	+	0.313202	0.183433	0.137994	2.09581	1.92786	896
Slc39a14	chr14	70303466	70351424	-	0.567019	0.769299	0.528179	1.66589	1.36343	897
Dmtn	chr14	70602183	70636048	-	10.0735	9.95402	9.85011	6.91802	5.83173	898
Sucla2	chr14	73552785	73596142	+	29.5472	29.7093	31.1036	22.0563	21.2935	899
Lcp1	chr14	75131122	75230842	+	0.538867	0.544101	0.394143	1.70523	2.17185	900
Tsc22d1	chr14	76415820	76507766	+	24.3804	23.2377	21.6017	38.9682	42.4733	901
Tdrd3	chr14	87416582	87545508	+	2.30481	2.45014	2.55405	3.88489	3.71193	902
Lmo7	chr14	101729927	101934693	+	5.56503	5.19537	5.80049	3.60036	3.53142	903
Gpc6	chr14	116925296	117979529	+	0.138949	0.225355	0.156491	0.969596	1.03395	904
Rap2a	chr14	120478460	120507192	+	2.01925	1.84742	2.00156	3.22471	3.6124	905
Oxct1	chr15	4026427	4155344	+	11.9304	11.3162	11.3026	15.9104	15.7107	906
Lifr	chr15	7129571	7197489	+	7.19902	7.65456	7.29228	10.1866	10.3078	907
Rai14	chr15	10568977	10714631	-	14.5108	13.9298	13.1015	18.904	20.3417	908
Sema5a	chr15	32244812	32696341	+	1.57384	2.04965	1.64326	3.7375	4.18288	909
Snx31	chr15	36504061	36555572	-	0.551234	0.510247	0.466601	0.0212728	0.0268855	910
Klf10	chr15	38291463	38300711	-	14.0729	13.3163	14.8919	18.9549	19.2483	911
Zfpm2	chr15	40655041	41104592	+	0.244034	0.324244	0.229111	1.17565	1.04518	912
Deptor	chr15	55112316	55259273	+	4.10207	4.08859	3.95729	6.05644	7.45948	913
Sqle	chr15	59315091	59331193	+	17.4509	17.5513	17.3102	26.7597	25.543	914
Fam84b	chr15	60818995	60825080	-	0.423365	0.524896	0.462686	1.63859	1.8202	915
Asap1	chr15	64086839	64382919	-	6.99337	7.30007	7.19941	9.84556	10.392	916
Ptk2	chr15	73205104	73423191	-	9.21992	9.62956	9.41669	12.2716	13.4685	917
Ly6e	chr15	74955050	74959905	+	15.1091	15.4421	15.8313	9.50935	10.415	918
Fam83h	chr15	76001091	76014336	-	0.622422	0.704307	0.5689	1.58975	2.41886	919
Plec	chr15	76170973	76231378	-	2.32937	2.22156	1.96314	3.79474	4.76044	920
Rbfox2	chr15	77078989	77307053	-	12.9683	13.562	12.7348	17.0115	17.639	921
Lgals1	chr15	78926724	78930465	+	6.31823	5.66598	5.20679	10.5583	12.9289	922
Gcat	chr15	79030873	79042531	+	6.06124	5.90793	6.14462	8.89064	8.78627	923
Dmc1	chr15	79561497	79605109	-	7.91946	7.53586	8.01338	3.40175	3.25711	924
Syngr1	chr15	80091333	80119501	+	2.91735	3.17862	2.6227	5.14452	5.23747	925
Atf4	chr15	80255183	80257545	+	91.6841	90.2153	90.5025	130.841	157.547	926
L3mbtl2	chr15	81663888	81688315	+	21.3217	20.1805	20.0918	15.1376	14.748	927
Sept3	chr15	82274934	82294442	+	3.47707	3.64582	4.08249	1.40165	1.40134	928
1700001L05Rik	chr15	83353846	83367297	-	5.65263	5.61366	5.90136	3.17069	3.68739	929
Parvb	chr15	84232042	84315609	+	1.78967	1.77328	1.46368	5.50349	7.41675	930
Smc1b	chr15	85064688	85131957	-	3.02245	3.15162	3.95884	0.572356	0.336276	931
Celsr1	chr15	85898757	86033777	-	2.89377	2.71781	2.65652	4.03127	4.64737	932
Twf1	chr15	94577947	94589824	-	21.0479	23.5836	21.089	43.9024	46.8115	933
Tmem117	chr15	94629184	95096097	+	0.599332	0.341854	0.317933	2.23329	2.39697	934
Slc38a1	chr15	96571417	96642913	-	13.7079	14.8159	14.1549	24.5122	25.5877	935
Slc38a4	chr15	96994822	97055956	-	36.0446	33.2627	36.1334	25.0054	19.2474	936
Asic1	chr15	99670717	99701130	+	1.16488	0.882696	0.857833	0.182037	0.212092	937
Lima1	chr15	99778467	99875456	-	46.3456	51.1292	50.0641	33.3866	26.722	938
Smagp	chr15	100621339	100636940	-	2.32806	2.94743	2.99492	6.4005	7.31745	939
Acvr1b	chr15	101174124	101212601	+	3.63773	3.08762	3.13581	6.01818	7.45679	940
Cbx5	chr15	103191545	103239816	-	47.179	50.815	48.0209	64.9691	69.6806	941
Nckap1l	chr15	103453824	103498800	+	2.52337	2.18103	2.28681	5.2343	6.43613	942
Ubn1	chr16	5050067	5086285	+	3.05642	3.12709	3.43655	4.67464	4.75933	943
Litaf	chr16	10959272	10993121	-	14.8449	15.292	16.5741	22.3648	22.1871	944
Cpped1	chr16	11803720	11909423	-	4.57852	4.71753	4.26463	7.14744	7.19666	945
Pla2g10	chr16	13715056	13730983	-	2.76894	2.24521	2.26758	0.739129	0.553706	946
Tmem191c	chr16	17276299	17278661	+	7.1798	6.93297	7.81466	2.21232	1.49235	947
B3gnt5	chr16	19760233	19772753	+	4.63703	5.25819	4.98466	10.0571	8.52537	948
Ephb3	chr16	21204794	21223304	+	2.62245	2.30589	2.08096	4.57351	4.14723	949
Kng2	chr16	22985851	23029101	-	2.61479	2.49737	3.13967	1.1366	0.545865	950
Bcl6	chr16	23965051	23988612	-	0.86034	0.754522	0.550271	1.79757	2.10642	951
Lpp	chr16	24393349	24992578	+	0.62745	0.634664	0.580997	1.78963	2.21613	952
Ccdc50	chr16	27388955	27452218	+	4.22331	4.62958	4.45209	6.342	7.91078	953
Mb21d2	chr16	28826175	28929698	-	1.79991	2.06697	1.65224	4.92643	5.09312	954
Hes1	chr16	30065356	30067796	+	10.8251	10.9395	10.2236	15.9229	16.8782	955
Iqcg	chr16	33014269	33056186	-	3.49559	3.20395	3.28366	1.92667	1.43041	956
Itgb5	chr16	33829664	33949338	+	7.37478	6.64172	6.44166	11.9074	11.0274	957
Fstl1	chr16	37777054	37836516	+	8.79986	8.74473	7.21907	22.356	24.2023	958
Lrrc58	chr16	37868399	37888857	+	12.6451	13.6612	13.7872	21.9948	21.462	959
Adprh	chr16	38445398	38452689	-	18.689	17.513	17.4389	26.8362	24.3619	960
Poglut1	chr16	38525057	38550256	-	16.6677	16.8873	16.4469	21.6325	22.9855	961
Tmem39a	chr16	38558697	38592162	+	24.4459	23.168	23.4386	36.2531	35.1416	962
Atp6v1a	chr16	44085403	44139019	-	22.0881	21.279	21.9089	34.7139	34.4792	963
Btla	chr16	45224336	45252895	+	0.145606	0.199418	0.103252	1.24053	1.07509	964
Phldb2	chr16	45746230	45844378	-	1.04655	0.926873	0.934314	2.72616	2.46285	965
Dppa2	chr16	48310273	48319513	+	43.1872	44.5278	46.1699	32.5984	32.0846	966
Pros1	chr16	62854333	62929340	+	2.58178	1.98841	1.9468	5.13693	6.24853	967
Cxadr	chr16	78301670	78359785	+	3.55246	3.88333	3.68034	6.71368	6.48626	968
Ttc3	chr16	94370738	94469221	+	17.2799	17.491	17.1326	22.7173	23.0356	969
Tiam2	chr17	3326572	3519397	+	1.89936	2.05291	2.00631	1.1774	1.11864	970
Rps6ka2	chr17	7170114	7303316	+	5.09964	5.18062	5.28363	7.08984	8.21114	971
Qk	chr17	10206470	10319361	-	18.1773	17.7536	17.6512	24.6779	27.0923	972
Dact2	chr17	14195229	14203831	-	3.43116	3.25755	3.38546	10.9531	11.7687	973
Zfp942	chr17	21926962	21962464	-	6.20672	6.09089	6.14946	8.71769	9.02662	974
Caskin1	chr17	24488782	24508907	+	0.372664	0.453703	0.553741	0.0526192	0.0586786	975
Slc9a3r2	chr17	24639281	24650305	-	3.04221	2.45211	3.10786	0.990641	1.17978	976
Dusp1	chr17	26505590	26508472	-	4.95366	5.31506	5.04866	8.93509	9.53275	977
9630028I04Rik	chr17	27235074	27248066	-	2.86609	2.99512	3.12361	0.711348	0.5338	978
Pacsin1	chr17	27655590	27711117	+	0.946827	0.791223	0.946851	0.185912	0.196714	979
Cpne5	chr17	29156520	29237790	-	2.61419	2.65189	3.32122	1.04611	0.796588	980
Pim1	chr17	29491044	29495459	+	31.2212	31.9875	35.015	22.8165	21.431	981
Notch3	chr17	32120892	32166852	-	2.06189	1.95565	1.90224	1.18851	1.0878	982
H2-K1	chr17	33996011	34000333	-	5.34918	4.01212	5.75363	1.21905	1.02346	983
Gm8909	chr17	36164443	36168537	-	5.82087	6.74315	5.89303	10.8858	10.452	984
Zfp57	chr17	37001162	37010729	+	75.9412	72.3352	70.5524	19.0035	21.6213	985
Ubd	chr17	37193891	37196101	+	6.97989	6.34136	4.94877	18.2943	14.963	986
Capn11	chr17	45630203	45659309	-	3.54596	2.49871	3.53287	0.170692	0.0984844	987
Ptk7	chr17	46564450	46629504	-	10.721	10.4972	10.7038	13.9272	15.3384	988
Ccnd3	chr17	47505050	47599688	+	31.0631	30.3478	30.6287	39.869	40.9891	989
Tfeb	chr17	47737036	47792416	+	3.45417	3.59712	3.64887	7.78733	7.77233	990
Foxp4	chr17	47867132	47924632	-	8.0569	7.43602	7.06362	13.3462	14.6848	991
Apobec2	chr17	48419230	48432728	-	2.43937	2.60644	2.64558	5.99347	5.24981	992
Dazl	chr17	50279392	50293620	-	8.33714	6.40923	8.84305	2.75304	2.59122	993
Catsperd	chr17	56628142	56664456	+	1.93528	1.7076	2.12952	0.722681	0.713264	994
Ppp4r1	chr17	65783354	65841926	+	10.4607	10.5256	10.4978	15.3228	18.2458	995
Ankrd12	chr17	65967500	66077046	-	2.45023	2.37535	2.35141	3.44325	3.71106	996
Rab12	chr17	66494511	66519670	-	8.97727	9.43433	8.69021	13.1774	15.077	997
Lama1	chr17	67697264	67822645	+	1.21438	1.047	1.02804	5.00339	6.94456	998
Myl12b	chr17	70973962	70990516	-	34.2656	35.9603	32.1822	47.012	54.8824	999
Clip4	chr17	71769690	71864210	+	1.25334	1.19769	1.37849	0.586336	0.538077	1000
Galm	chr17	80127470	80185032	+	1.96097	1.85269	1.75916	3.6773	3.93749	1001
Plekhh2	chr17	84511894	84622142	+	2.70462	2.30268	2.69072	0.757631	0.797062	1002
Lama3	chr18	12334023	12583012	+	7.59917	7.67088	8.21116	4.37007	3.79552	1003
Zfp521	chr18	13687013	13972733	-	0.0883601	0.19044	0.11819	1.10914	0.621374	1004
Mep1b	chr18	21072343	21100199	+	8.61458	8.68145	10.6665	1.23722	1.87797	1005
Epb4.1l4a	chr18	33796326	34007206	-	12.0888	13.0024	12.0807	23.1027	25.4199	1006
Pcdhga1	chr18	37661944	37841870	+	5.13116	4.89059	4.7724	7.32896	7.38617	1007
Pcdhga8	chr18	37725705	37841872	+	4.37117	4.25406	4.08006	6.29189	6.37	1008
Pcdhgb5	chr18	37731153	37841870	+	4.60331	4.42626	4.15386	6.49117	6.62955	1009
Pcdhga9	chr18	37736935	37841863	+	4.24786	4.09932	3.86967	6.04457	5.97147	1010
Pcdhgb7	chr18	37751778	37841870	+	4.58217	4.39499	4.20198	6.5795	6.38051	1011
Pcdhga11	chr18	37755772	37841872	+	4.62049	4.47022	4.18563	6.62142	6.46849	1012
Pcdhgc3	chr18	37806409	37841872	+	6.20904	5.93787	5.94144	8.44986	8.39216	1013
Gnpda1	chr18	38327536	38338993	-	30.7119	27.7385	29.5066	39.8569	41.875	1014
Spry4	chr18	38586264	38601268	-	0.0907812	0.192329	0.0770521	2.96851	2.81775	1015
Mcc	chr18	44425059	44812182	-	1.35225	1.58748	1.26139	3.84605	4.34205	1016
Cdo1	chr18	46713204	46728342	-	6.89148	7.80042	7.47405	13.4895	11.7327	1017
Slc6a7	chr18	60995379	61014199	-	1.58786	1.43716	1.28716	3.12689	2.76886	1018
Cdx1	chr18	61018861	61036199	-	3.92358	3.62817	4.36753	12.5799	15.7644	1019
Nars	chr18	64499646	64516557	-	72.2894	70.3349	69.2287	92.7956	101.924	1020
Zfp532	chr18	65580229	65689436	+	9.07817	9.34709	9.00188	13.957	13.368	1021
Pmaip1	chr18	66458603	66465558	+	6.18455	4.87425	5.41919	9.80705	10.9408	1022
Mapk4	chr18	73928485	74064949	-	0.730325	0.941925	0.851681	3.23471	2.92872	1023
Smad7	chr18	75367364	75395934	+	6.80042	6.47188	6.26922	11.2913	14.0556	1024
Rnf165	chr18	77456109	77565136	-	0.501314	0.537209	0.519468	1.411	1.20347	1025
Setbp1	chr18	78750377	79109391	-	0.444048	0.540595	0.457901	1.48772	1.33013	1026
Tshz1	chr18	84011626	84086562	-	0.0654373	0.0642394	0.0540716	0.568634	0.567039	1027
Zadh2	chr18	84088157	84097514	+	0.283671	0.419179	0.230739	2.2672	2.80357	1028
Fbxo15	chr18	84935024	84981392	+	119.507	115.626	122.374	89.5619	84.3344	1029
Sptbn2	chr19	4711222	4752352	+	3.30656	3.5479	3.8032	0.626559	0.345344	1030
Actn3	chr19	4861215	4877909	-	3.77773	3.37535	4.13111	0.827419	0.614888	1031
Neat1	chr19	5824709	5845480	-	2.82859	2.9195	2.65527	5.69962	6.89035	1032
Rcor2	chr19	7269763	7275225	+	42.0176	39.8034	42.3014	23.9493	22.2694	1033
Slc3a2	chr19	8706881	8723369	-	30.3477	29.6777	30.947	40.4813	41.5313	1034
Ttc9c	chr19	8809074	8819294	-	11.4914	11.4825	11.2057	16.3675	17.9679	1035
Stx3	chr19	11775117	11819403	-	5.42194	6.29727	5.69492	8.66128	8.67891	1036
Patl1	chr19	11912398	11945096	+	15.2068	15.3881	15.417	20.5724	21.2726	1037
Prune2	chr19	16956117	17223932	+	1.099	0.98642	1.00817	1.57927	1.81836	1038
Smarca2	chr19	26605159	26778321	+	1.95575	2.34595	2.17597	3.96268	3.96153	1039
Vldlr	chr19	27217019	27254231	+	0.364167	0.302426	0.307448	0.726863	0.869947	1040
Slc1a1	chr19	28835165	28913960	+	4.17741	2.8844	3.71452	0.669986	0.73277	1041
March5	chr19	37207544	37224457	+	6.83406	6.30766	6.89883	9.3092	10.839	1042
Slc35g1	chr19	38395979	38405607	+	5.90322	5.70782	5.97203	3.49608	2.83375	1043
Abcc2	chr19	43782307	43838218	+	0.665638	0.803315	0.772951	0.0780147	0.0201678	1044
Scd2	chr19	44293675	44306862	+	156.271	151.442	148.589	227.852	209.723	1045
Mir5114	chr19	44303170	44303231	+	1002.07	977.136	984.346	1463.96	1308.67	1046
Scd1	chr19	44394449	44407709	-	52.6274	52.313	50.7394	84.2075	75.5347	1047
Btrc	chr19	45363733	45533343	+	5.76872	5.32519	5.89914	3.31745	3.42235	1048
Gsto1	chr19	47854988	47864788	+	26.746	27.4465	24.5053	47.0756	50.0517	1049
Tcf7l2	chr19	55741809	55933655	+	3.19521	3.47887	3.25385	5.04509	5.33118	1050
Ablim1	chr19	57033263	57216032	-	2.94307	2.64051	2.53447	4.17975	5.41444	1051
Plp2	chrX	7668115	7671278	-	54.392	60.8431	57.7704	89.5537	81.6175	1052
Jade3	chrX	20425687	20519939	+	11.0748	11.7759	12.9125	7.50465	6.14449	1053
Sept6	chrX	36911271	36989695	-	2.31836	2.02038	2.32658	1.26411	0.995369	1054
Bcorl1	chrX	48341357	48406728	+	3.35419	3.40089	3.62811	1.81273	1.9578	1055
Usp26	chrX	51753958	51801233	-	16.3152	15.0913	14.7802	1.35939	0.48649	1056
Phf6	chrX	52912213	52956961	+	4.4923	4.84336	4.39641	8.03747	6.77434	1057
Fhl1	chrX	56731760	56793346	+	3.26004	3.62805	2.85902	11.7293	11.2342	1058
Zic3	chrX	58030627	58036630	+	12.1497	12.6137	11.974	18.2102	17.0905	1059
Mcf2	chrX	60055955	60179089	-	29.147	27.8144	29.2411	20.8504	19.3533	1060
Vma21	chrX	71816079	71824706	+	2.44271	2.44442	2.547	3.97629	3.88213	1061
Pnma5	chrX	73033980	73037103	-	12.3498	13.5769	13.2907	7.89637	6.47101	1062
Xlr3a	chrX	73086292	73097095	-	16.2798	14.8224	14.8525	6.06834	5.80707	1063
Xlr3b	chrX	73192178	73202930	+	9.01917	8.40963	8.61511	4.24274	4.76097	1064
Renbp	chrX	73922120	73930850	-	14.1306	13.9597	14.5214	20.6734	21.6526	1065
Tex11	chrX	100838647	101059639	-	2.03146	2.0595	2.60228	0.595528	0.967697	1066
Phka1	chrX	102513974	102644246	-	3.37153	3.46475	3.53444	1.07816	1.22637	1067
Gm9112	chrX	102706887	102707670	-	2.33893	2.67467	4.38539	0.209082	0.0792739	1068
Dmrtc1c1	chrX	102847638	102854616	-	2.28287	2.09179	2.40877	0.361798	0.354186	1069
Dmrtc1c2	chrX	102847638	102854616	-	2.28287	2.09179	2.40877	0.361798	0.354186	1070
Rlim	chrX	103957166	103981284	-	23.1826	26.0782	24.4976	34.0486	31.777	1071
Gprasp2	chrX	135839033	135844730	+	3.0511	2.69013	2.59884	1.3314	1.19084	1072
Nxf3	chrX	136072098	136085255	-	6.82573	5.40998	6.46585	1.75186	1.3321	1073
Wbp5	chrX	136245079	136247139	+	29.4353	28.1167	25.6508	44.9218	47.3315	1074
Prps1	chrX	140456602	140476140	+	30.6288	33.8847	36.4811	19.8454	17.1511	1075
Tro	chrX	150644709	150657583	-	2.1205	1.82069	2.25094	0.923191	1.07259	1076
Map7d2	chrX	159414577	159498947	+	3.31404	2.77513	3.27301	1.195	1.20792	1077
Piga	chrX	164419786	164433915	+	8.37516	7.97099	8.87536	11.9192	11.5803	1078
Egfl6	chrX	166523006	166585716	-	2.05994	2.11266	1.81928	3.58845	4.08573	1079
Tmsb4x	chrX	167207093	167209218	-	22.335	23.6154	22.6102	34.4266	37.634	1080

## Sheet: Table S2
Table S2. Expression levels of ZFP57 bound transposable elements as determined by RNA-seq (FPKM values).
CHR	START	END	STRAND	WT-1	WT-2	WT-3	KO-1	KO-2	ANNOTATION	Index
chr1	5567031	5567866	-	0.0216708	0	0	0	0	IAPLTR2a2_Mm	1
chr1	6430380	6437485	-	0.010198	0.0262798	0.0138251	0.00806786	0.0101965	IAPLTR1a_Mm	2
chr1	7060539	7060909	-	0	0	0	0	0	RLTR44A	3
chr1	7128011	7129726	-	0.0527878	0.0098932	0.0229001	0.0334092	0	MMERVK9C_I-int	4
chr1	7709069	7710221	-	0	0	0	0	0	MMVL30-int	5
chr1	8067884	8071448	+	0	0	0	0.00536047	0	IAPEY2_LTR	6
chr1	8786683	8790340	+	0	0	0	0	0	IAPLTR2b	7
chr1	9445775	9446574	-	0	0	0	0	0	RLTR13C2	8
chr1	9520033	9520998	+	0	0	0.0610195	0	0	RLTR13B1	9
chr1	9521304	9521743	+	0	0	0	0	0	Lx9	10
chr1	11367490	11370210	-	0.0133163	0.00623915	0.014442	0.0210695	0.0133143	IAPLTR2a	11
chr1	13960712	13963451	+	0	0.00619589	0	0	0	IAPLTR2b	12
chr1	15754660	15755510	-	0	0	0	0	0	RLTR13B1	13
chr1	15861484	15861942	+	0.749932	1.25754	0.51368	0.749414	1.105	RCHARR1	14
chr1	17524389	17527307	-	0.0062065	0.00581594	0	0	0	IAPLTR2_Mm	15
chr1	23107059	23107457	+	0	0	0	0	0	IAPLTR2a	16
chr1	23937202	23937762	+	0	0	0	0	0	LTRIS2	17
chr1	24595479	24596034	-	0	0	0	0	0	Lx2B	18
chr1	30705746	30706165	-	0	0	0	0	0.0431288	IAPLTR2a2_Mm	19
chr1	31005097	31007703	+	0	0	0	0	0	IAPLTR2a2_Mm	20
chr1	32588242	32589054	-	0	0	0	0	0	IAPLTR2a2_Mm	21
chr1	36049601	36049917	+	0	0	0	0	0	IAPLTR2b	22
chr1	36720782	36721628	-	0	0	0	0	0	RLTR13B1	23
chr1	37206394	37207270	-	0	0	0	0	0	RLTR13B1	24
chr1	37209135	37209537	+	0	0	0.0975101	0	0	IAPLTR2a	25
chr1	40458960	40459113	-	0	0	0	0	0	RSINE1	26
chr1	45612122	45613424	-	0.0139039	0	0.0452378	0.0146662	0	IAPLTR2a2_Mm	27
chr1	50159465	50162582	+	0.00581038	0.0108895	0.00630156	0	0	IAPLTR2a2_Mm	28
chr1	53235549	53238345	+	0.00647722	0	0	0.020497	0	IAPLTR2a2_Mm	29
chr1	57523323	57523651	+	0	0	0	0	0	IAPEY2_LTR	30
chr1	57585094	57588831	-	0.0533131	0.0635833	0.0788454	0.173821	0.135686	IAPLTR2b	31
chr1	58641194	58646596	+	0.23807	0.191668	0.196374	0.272344	0.34867	MMERGLN-int	32
chr1	58883425	58885271	+	0	0	0	0	0	IAPEY2_LTR	33
chr1	64249478	64250364	+	0	0	0	0	0	RLTR13B1	34
chr1	64642779	64643128	+	0.0517622	0	0	0	0.103509	IAPLTR2a	35
chr1	64960311	64967388	-	0.00255959	0.0143911	0.00832789	0.00539985	0.0102368	IAPLTR1a_Mm	36
chr1	65708124	65710310	+	0	0	0	0.00873803	0	IAPLTR2a2_Mm	37
chr1	65815059	65817704	+	0.00684685	0	0	0	0	IAPLTR2a2_Mm	38
chr1	66966193	66969587	-	0.00533631	0.00500051	0.0289371	0.0168867	0.010671	L1Md_F	39
chr1	68189073	68189948	-	0.0206813	0	0.0224295	0	0	RLTR13B1	40
chr1	68610751	68613541	+	0.0259646	0.0304134	0.0281595	0.0205411	0.0129804	IAPLTR2a	41
chr1	71209371	71210257	+	0	0	0	0	0	RLTR13B1	42
chr1	71863055	71863406	+	0	0	0	0	0	IAPLTR2b	43
chr1	71870201	71870606	-	0	0	0	0.0470691	0	IAPLTR2a2_Mm	44
chr1	76002914	76005841	+	0.0185623	0.00579806	0.0268419	0.00652666	0	IAPLTR2a2_Mm	45
chr1	76592162	76592622	-	0	0	0	0	0	IAPLTR2a2_Mm	46
chr1	80144835	80146829	+	0	0	0	0	0	IAPEY2_LTR	47
chr1	85011939	85012084	+	0	0	0	0	0	B2_Mm2	48
chr1	85875452	85883617	-	0	0	0	0	0	IAPEY3-int	49
chr1	86317493	86319849	-	0	0	0	0	0.00768523	IAPLTR2a2_Mm	50
chr1	88977414	88977885	+	0	0	0	0	0	IAPLTR2_Mm	51
chr1	90550524	90551012	+	1.48194	0.972083	0.883971	0.273559	0.703819	IAPLTR2_Mm	52
chr1	92220587	92220994	+	0.133212	0	0.0963151	0	0	IAPLTR2a	53
chr1	93197315	93198112	-	0	0	0	0	0	RLTR13G	54
chr1	95803364	95806890	+	0	0.00481336	0	0	0.0102717	IAPLTR2b	55
chr1	96966811	96969820	-	0	0.0112802	0	0	0	IAPLTR2a2_Mm	56
chr1	101089087	101093624	-	0.00399224	0	0	0	0	IAPEY_LTR	57
chr1	102149603	102152466	+	0	0	0	0	0	IAPLTR2a2_Mm	58
chr1	103478827	103481461	+	0	0	0.00745665	0	0	IAPLTR2a	59
chr1	105226215	105226576	+	0	0	0	0	0	IAPEY2_LTR	60
chr1	105471342	105477743	-	0.319774	0.281089	0.19949	0.280591	0.263138	L1Md_F3	61
chr1	106802492	106806053	+	0	0.0142982	0.00551608	0.0214599	0.0305122	IAPEY2_LTR	62
chr1	112440135	112444675	-	0.0119688	0.0261698	0.0173074	0.00420834	0.011967	IAPEY_LTR	63
chr1	114937190	114940803	-	0	0	0	0	0	IAPEY_LTR	64
chr1	121669062	121669407	-	0.104721	0	0.227148	0.110463	0	IAPLTR2b	65
chr1	127891984	127897254	-	0.0756155	0.0837403	0.07828	0.0435061	0.0687311	IAPLTR1_Mm	66
chr1	128087162	128089944	+	0.0195294	0.00610016	0.0141202	0.0206001	0.00650883	IAPEY_LTR	67
chr1	132410111	132410471	+	0.050185	0.0940539	0.163282	0	0	IAPLTR2a	68
chr1	136807987	136810714	-	0.00664105	0	0.00720245	0.00700515	0	IAPLTR2_Mm	69
chr1	142611989	142616036	+	0	0.00419386	0	0.00944173	0.0134245	IAPEY_LTR	70
chr1	143831954	143834673	-	0	0.00624145	0	0	0	IAPEY2_LTR	71
chr1	146406190	146406569	+	0	0	0	0	0	IAPEY_LTR	72
chr1	150229684	150230415	+	0	0	0	0	0	IAPLTR2a2_Mm	73
chr1	160815897	160821026	-	0.0812253	0.0694954	0.0727714	0.0335264	0.0741512	IAPLTR1_Mm	74
chr1	166575510	166585342	+	0	0.00172651	0	0	0	IAPLTR2b	75
chr1	169542419	169548890	+	0.131565	0.128532	0.0910767	0.0738182	0.0671721	IAPEz-int	76
chr1	170942047	170949650	+	0.0238253	0.0178608	0.00775182	0.00753948	0.0190574	MuLV-int	77
chr1	171484797	171489282	+	0.0161541	0.00378438	0.00875982	0.0212997	0.0161517	MuLV-int	78
chr1	171829710	171832731	+	0.00599496	0	0	0	0	IAPLTR2a2_Mm	79
chr1	173572497	173580638	-	0	0.00208508	0	0	0	IAPEY3_LTR	80
chr1	174288300	174294094	+	0.0593993	0.0527319	0.0508583	0.0527629	0.0593904	ETnERV-int	81
chr1	176583565	176587338	-	0.0240021	0.00899668	0.0156187	0.0101272	0	IAPEY2_LTR	82
chr1	178129583	178132816	-	0.0224079	0.0262473	0.0121511	0.053182	0.0280057	L1Md_F2	83
chr1	178223118	178228726	-	0	0.00605339	0.00350299	0	0.00322947	MMERGLN-int	84
chr1	179397638	179397943	-	4.5588	5.1596	6.03574	4.80874	5.09089	IAPLTR2b	85
chr1	180612082	180616530	+	0.0244326	0.0381585	0.0176653	0.00859072	0.0122145	IAPLTR2_Mm	86
chr1	181263525	181270606	-	0.00511629	0.0071915	0.00832319	0.0026984	0	IAPLTR1a_Mm	87
chr1	182173904	182177344	+	0.00526497	0	0.00571005	0	0	IAPEY2_LTR	88
chr1	185303498	185306509	+	0.00601487	0.00563637	0	0.0126893	0.00601397	IAPLTR2a2_Mm	89
chr1	191156148	191158709	+	0	0	0	0	0	MURVY-int	90
chr1	191501584	191504565	+	0.0121508	0	0	0	0	IAPLTR2a2_Mm	91
chr1	192629956	192630200	+	0	0.0692928	0	0	0	IAPLTR2a2_Mm	92
chr1	192957228	192960165	+	0	0	0	0	0	IAPLTR2b	93
chr2	5684025	5691128	+	0.0127511	0.0143385	0.0027658	0.00538009	0.00764953	IAPLTR1a_Mm	94
chr2	11104820	11107867	+	0.00594382	0	0	0.00626971	0	IAPLTR2_Mm	95
chr2	17892445	17892793	-	0	0	0	0	0	IAPLTR2b	96
chr2	18323015	18323553	+	0	0	0.0364532	0.0354547	0	IAPLTR2_Mm	97
chr2	23059340	23059658	+	0	0	0	0	0	IAPLTR2b	98
chr2	23866227	23866578	-	0	0	0	0	0	ERVB7_2B-LTR_MM	99
chr2	26835641	26842121	+	0	0.00261946	0	0	0.00279495	IAP-d-int	100
chr2	26879057	26880164	+	0	0	0	0	0	MMERVK9E_I-int	101
chr2	27495806	27498075	+	0.00798096	0	0	0	0	MURVY-int	102
chr2	30228095	30231840	+	0.0145089	0.00906393	0.00524513	0	0.00483558	MURVY-int	103
chr2	32117105	32119977	+	0	0.00590906	0.00683894	0.00665161	0	IAPLTR2a	104
chr2	32473359	32477818	+	0.00406206	0.00761289	0	0.00856953	0	IAPLTR2_Mm	105
chr2	35519524	35526597	+	0.00256104	0.00239988	0.0166652	0.0054029	0	IAPLTR1_Mm	106
chr2	35526598	35526984	-	0	0	0.152312	0	0	RLTR14_RN	107
chr2	36511185	36513868	-	0	0	0	0	0	IAPLTR2a2_Mm	108
chr2	42202569	42202992	-	0	0	0	0	0	RLTR10	109
chr2	42750708	42751045	-	0	0.050227	0.116262	0.0565386	0	IAPLTR1a_Mm	110
chr2	47195657	47198290	+	0	0	0.00745948	0	0.00687703	IAPLTR2a2_Mm	111
chr2	49603741	49605912	+	0	0.00781618	0	0	0	IAPLTR2a2_Mm	112
chr2	50679607	50686703	+	0.0561602	0.0741551	0.0526021	0.061932	0.0255236	IAPLTR1_Mm	113
chr2	53899569	53900520	+	0	0	0	0	0	RLTR13E	114
chr2	56064625	56069254	-	0.00782582	0.00366668	0.00848738	0	0.00782466	IAPEY_LTR	115
chr2	58674103	58678192	+	0	0	0.00480398	0.00467239	0	IAPA_MM-int	116
chr2	60565712	60566029	+	0	0	0	0	0	IAPLTR2b	117
chr2	62416133	62416467	-	0.10816	0	0.0586516	0	0	IAPLTR2b	118
chr2	65579837	65581132	-	0	0	0	0	0	IAPEY2_LTR	119
chr2	65581283	65583558	-	0.00795992	0	0.0172656	0	0	IAPEY2_LTR	120
chr2	70265569	70269806	-	0.00854968	0.00400584	0.00463621	0.00901843	0.00427421	IAPLTR2a2_Mm	121
chr2	70270045	70270395	-	0	0	0	0	0	RLTR10	122
chr2	70270423	70270844	-	0	0.0804585	0.0465599	0	0	IAPLTR2a2_Mm	123
chr2	76583935	76584080	-	0	0	0	0	0	B1_Mur4	124
chr2	78316815	78319610	+	0.00647953	0.00607179	0	0	0.00647857	IAPLTR2_Mm	125
chr2	83687404	83687738	+	0.2704	0.202707	0	0.171135	0.270359	IAPLTR2b	126
chr2	84565001	84572120	+	0.010178	0.0214594	0.0137979	0.00805199	0.0178088	IAPLTR1a_Mm	127
chr2	87594162	87596643	-	0	0	0	0	0	IAPLTR2a2_Mm	128
chr2	87872557	87875223	+	0	0	0.00736718	0.00716538	0.00679193	IAPLTR2a2_Mm	129
chr2	99435993	99438724	+	0	0	0	0	0	IAPLTR2a2_Mm	130
chr2	105569216	105569571	-	0	0	0	0	0	IAPLTR2a	131
chr2	106129281	106129764	+	0	0	0	0	0	IAPLTR2a2_Mm	132
chr2	106566770	106569369	-	0.013936	0	0	0.00735002	0	IAPLTR2a2_Mm	133
chr2	108046836	108049735	-	0.0187415	0.0117081	0.00677527	0	0.0124925	IAPLTR2a2_Mm	134
chr2	108469999	108473590	+	0	0	0.00547001	0	0	IAPLTR2b	135
chr2	122219848	122219909	-	0	0	0	0	0	MTD	136
chr2	125957173	125961714	-	0.00398872	0.00373772	0.0129777	0	0	IAPEY_LTR	137
chr2	129521275	129525144	-	0	0	0	0	0	IAPLTR2_Mm	138
chr2	131645487	131648293	-	0.0193624	0	0.00699974	0.006808	0	IAPLTR2a2_Mm	139
chr2	137394673	137397546	+	0.00630368	0.00590701	0.00683656	0	0	IAPLTR2a2_Mm	140
chr2	138623880	138624279	-	0.0452919	0.127326	0	0	0	IAPLTR2a2_Mm	141
chr2	146135770	146140281	+	0.0120457	0.0112877	0.00870934	0.0127062	0.00401465	IAPLTR1a_Mm	142
chr2	148735318	148735836	+	0	0	0	0	0	IAPLTR2_Mm	143
chr2	148914848	148917840	+	0.0121061	0	0	0	0	IAPEY2_LTR	144
chr2	150196941	150198308	-	0.052973	0.0248198	0.0574511	0.0139693	0.0132413	IAPLTR2_Mm	145
chr2	155112439	155112956	-	0	0	0	0.036892	0	IAPLTR2_Mm	146
chr2	163650892	163655864	+	0.0437163	0.0170689	0.0355589	0.0192138	0.0364249	IAPLTR1a_Mm	147
chr2	164524201	164526771	+	0.627146	0.468825	0.664877	0.215555	0.112729	RLTR44-int	148
chr2	165927948	165928269	+	0	0	0	0	0	MTC	149
chr2	165928441	165933675	+	0.0899783	0.0875591	0.112598	0.0182522	0.0484426	IAPLTR1_Mm	150
chr2	166530652	166535090	+	0.0816255	0.0994357	0.0885257	0.0688806	0.0652907	IAPLTR2_Mm	151
chr2	166812198	166817469	-	0.0824739	0.0901647	0.0931728	0.0652468	0.137436	IAPLTR1_Mm	152
chr2	168725307	168725754	+	0	0	0	0	0	IAPLTR2_Mm	153
chr2	177551753	177553496	+	0.0415522	0	0.0112662	0.0109576	0.0103865	IAPLTR2b	154
chr3	4767758	4769445	+	0	0	0	0	0	IAPEY_LTR	155
chr3	6138248	6138569	-	0	0.0527228	0	0	0	IAPLTR2b	156
chr3	6829915	6830800	+	0	0	0	0	0	RLTR13B1	157
chr3	7675076	7675394	+	0	0	0	0	0	IAPLTR2b	158
chr3	8224762	8230295	-	0.00327372	0.00306771	0	0	0.00654647	IAPEz-int	159
chr3	8574072	8576822	-	0.00658552	0	0.00714223	0	0	IAPLTR2a2_Mm	160
chr3	9989572	9995967	-	0.48436	0.472461	0.494586	0.690185	0.804315	L1Md_A	161
chr3	12836906	12839990	+	0.00587254	0	0	0	0.00587166	IAPLTR2a2_Mm	162
chr3	13883882	13884936	-	0	0	0	0	0	IAPLTR2b	163
chr3	13888405	13889890	-	0	0	0	0	0.0121898	IAPLTR2b	164
chr3	14234734	14242307	-	0.00478394	0.0179316	0.015565	0.0126156	0.0119581	IAPLTR2_Mm	165
chr3	14393597	14397147	+	0.0102038	0	0	0	0	IAPEY2_LTR	166
chr3	19841820	19843849	-	0	0	0	0	0	IAPLTR2a2_Mm	167
chr3	21156668	21160416	-	0	0	0	0	0	IAPLTR2b	168
chr3	21522954	21523325	+	0	0	0	0	0	IAPLTR2a	169
chr3	22336076	22341461	+	0.0235458	0.0315201	0.0291842	0.0212886	0.036995	L1Md_T	170
chr3	28875338	28883508	+	0	0.00207768	0	0	0	IAPLTR3-int	171
chr3	29783368	29783751	-	0	0	0	0	0	IAPEY_LTR	172
chr3	30578979	30579435	-	0.0396428	0.111445	0.042994	0	0	IAPLTR2_Mm	173
chr3	32800964	32805010	+	0	0	0	0	0.00447593	IAP-d-int	174
chr3	33282448	33282837	+	0	0	0	0	0	RLTR44B	175
chr3	33321632	33324790	-	0	0	0	0	0	IAPLTR2_Mm	176
chr3	35635979	35636359	+	0	0	0	0	0	IAPLTR2a	177
chr3	35870889	35874663	+	0.00959829	0.0134914	0	0.0101245	0	IAPLTR2a	178
chr3	36415513	36419957	+	0	0	0	0	0	IAPLTR2b	179
chr3	37245230	37248382	+	0	0	0	0	0	IAPEY2_LTR	180
chr3	38109685	38110431	-	0	0	0	0	0	RLTR13B2	181
chr3	39446016	39449695	-	0	0	0	0	0	IAPLTR2b	182
chr3	40220013	40220598	-	0	0	0.0335295	0	0	IAPEY2_LTR	183
chr3	44648532	44650187	+	0.0656405	0.153775	0.106784	0.0807793	0.0875077	ETnERV-int	184
chr3	51101053	51105219	+	0.00869536	0.0285186	0.00471521	0.0091721	0.00869407	IAPEY_LTR	185
chr3	51239967	51245301	+	0.499188	0.413679	0.478777	0.272233	0.404044	IAPLTR1_Mm	186
chr3	51245340	51245459	-	0	0	0	0	0	B1_Mur1	187
chr3	52229940	52230524	+	0	0	0	0	0	IAPLTR2a2_Mm	188
chr3	54871834	54874366	+	0	0	0	0	0	IAPLTR2a2_Mm	189
chr3	58564097	58564541	-	0	0	0	0	0	L1_Mur3	190
chr3	60106277	60107132	+	0	0	0	0	0	RLTR13G	191
chr3	64046237	64052156	-	0.0091808	0.00286769	0	0	0.00611962	IAPLTR2b	192
chr3	64246271	64249805	+	0	0	0	0	0.00512421	ERVB4_1-I_MM-int	193
chr3	68753001	68753386	+	0	0	0	0	0	IAPLTR2a2_Mm	194
chr3	68798513	68798959	+	0	0	0	0	0	RLTR44C	195
chr3	68801297	68801732	+	0	0	0	0	0	RLTR44C	196
chr3	69637939	69645075	-	0.0101537	0.0190295	0.00825905	0.00535521	0.0101522	IAPLTR1_Mm	197
chr3	69645225	69645398	+	0	0	0	0	0	URR1A	198
chr3	75416930	75417333	-	0	0	0.0486343	0	0	RLTR13A3	199
chr3	75968474	75971029	-	0.0141759	0	0	0	0	IAPLTR2a2_Mm	200
chr3	85305225	85308091	-	0.0126381	0	0	0	0	IAPLTR2a2_Mm	201
chr3	87599896	87608103	+	0	0	0	0	0	IAPEY3-int	202
chr3	88063557	88066244	-	0	0.00631575	0	0	0	IAPLTR2a2_Mm	203
chr3	88369986	88372606	-	4.6035	4.38506	5.76479	1.60405	1.13343	IAP-d-int	204
chr3	88666410	88673486	+	0.051199	0.0575726	0.0416453	0.035104	0.0435127	IAPLTR1a_Mm	205
chr3	94028583	94035156	-	0.0192908	0.0154944	0.0179327	0.0116277	0.0247987	L1Md_A	206
chr3	95343531	95344490	-	1.92491	1.5562	1.80109	1.93091	1.62272	RLTR13B3	207
chr3	96314818	96319763	-	1.13917	1.41416	1.39834	2.39552	1.30747	MMERVK10C-int	208
chr3	98995696	98996055	+	0	0	0	0	0	IAPEY2_LTR	209
chr3	99507566	99508286	-	0	0	0	0.0265049	0	RLTR10-int	210
chr3	101505211	101505659	-	0	0	0	0	0	IAPLTR2_Mm	211
chr3	103382352	103382766	-	0.218274	0.409078	0.426107	0	0	IAPLTR2a	212
chr3	106184083	106187645	-	0	0	0	0	0	IAPEY2_LTR	213
chr3	113957803	113957933	-	0	0	0	0	0	RLTR13C2	214
chr3	115909127	115914440	+	0.432975	0.408924	0.454787	0.363213	0.494268	IAPLTR1_Mm	215
chr3	117202224	117205147	-	0	0	0	0	0	IAPLTR2a2_Mm	216
chr3	122654222	122657193	+	0.00609582	0.00571223	0.0132223	0	0.00609491	IAPLTR2_Mm	217
chr3	130677636	130678010	-	0	0	0	0	0	MTEa	218
chr3	130918105	130920587	+	0	0	0	0	0	IAPLTR2a2_Mm	219
chr3	131544242	131548125	+	0.00466446	0.00874188	0.00505877	0.0049202	0	IAPLTR2a	220
chr3	139560020	139564179	-	0	0.0204047	0	0.0275626	0.0391891	IAPEY_LTR	221
chr3	144857926	144858334	-	0.0442953	0	0	0	0	IAPLTR2_Mm	222
chr3	146083586	146090395	+	0.00798096	0.00249291	0.00577042	0.00561235	0	IAPLTR1a_Mm	223
chr3	154370784	154371228	-	0	0	0	0	0	IAPLTR2a2_Mm	224
chr4	7648866	7651767	+	0	0	0	0	0	IAPLTR2b	225
chr4	8313415	8316437	+	0	0	0	0.00632156	0	IAPLTR2_Mm	226
chr4	10489314	10489685	-	0.048701	0.0456364	0	0	0	RLTR10	227
chr4	11176469	11183871	-	1.55154	1.69011	1.70393	2.33358	2.21196	MMERGLN-int	228
chr4	12403916	12404716	-	0	0	0	0	0	RLTR13C2	229
chr4	14482623	14483087	+	0	0	0	0	0	IAPLTR2a2_Mm	230
chr4	15546663	15547462	+	0	0	0	0	0	RLTR13C2	231
chr4	16021866	16022195	+	0	0	0	0	0	IAPEY2_LTR	232
chr4	16433278	16435777	-	0.00724671	0	0	0	0.00724563	IAPLTR2a2_Mm	233
chr4	19294169	19297234	-	0	0	0	0	0	IAPLTR2_Mm	234
chr4	19960009	19960860	+	0	0	0	0	0	RLTR13B4	235
chr4	21129238	21131639	-	0	0	0	0	0	IAPLTR2a2_Mm	236
chr4	22349652	22353656	+	0	0.00847777	0	0.00477155	0.0135686	IAP-d-int	237
chr4	26195451	26195872	-	0	0	0	0	0	IAPLTR2a2_Mm	238
chr4	27410810	27417180	-	0.0853089	0.122576	0.0709324	0.0659899	0.153533	ETnERV-int	239
chr4	28765675	28768595	-	0	0.00581196	0	0	0	IAPLTR2a2_Mm	240
chr4	31950253	31953243	+	0	0	0	0	0	IAPLTR2a2_Mm	241
chr4	32894303	32894434	+	0	0	0	0	0	RSINE1	242
chr4	34733854	34734260	+	0	0	0	0	0	MTC	243
chr4	35014847	35015726	+	0	0	0	0	0	RLTR13B1	244
chr4	40026209	40029170	-	0.0061164	0	0	0.00645174	0.00611549	IAPLTR2a2_Mm	245
chr4	41454734	41460000	+	0.113509	0.106366	0.126835	0.0399109	0.0722225	IAPLTR1_Mm	246
chr4	41461327	41461461	+	0	0	0	0	0.134178	B1_Mus1	247
chr4	43297723	43302122	-	0.0082349	0.011575	0.0223276	0.00868639	0.0205842	IAPLTR1a_Mm	248
chr4	45836856	45841775	-	0.0625986	0.0517583	0.107826	0.0427257	0.0220903	IAPLTR1_Mm	249
chr4	48743243	48743690	-	0.0404392	0	0.0877155	0.0426564	0	RLTR13B1	250
chr4	51320194	51323388	+	0.0113407	0	0	0.00598124	0	IAPLTR2b	251
chr4	52679609	52680513	-	0.0200185	0	0.0217108	0	0.100078	L1Md_T	252
chr4	58769388	58773342	-	0	0	0	0	0	IAPLTR2a	253
chr4	59498652	59499129	-	0.758024	0.710324	0.657683	0.759605	0.871598	IAPLTR2_Mm	254
chr4	59502070	59502514	+	0.0407119	0.1526	0.13246	0.042944	0	IAPLTR2_Mm	255
chr4	60032868	60039348	-	0.00559073	0.00261946	0	0.00294863	0.0055899	IAPLTR2b	256
chr4	60268404	60274192	-	0.0250361	0	0.0135763	0	0.00625811	IAPEz-int	257
chr4	61919586	61922367	+	0.0130243	0	0.00706264	0	0.00651117	IAPLTR2b	258
chr4	62443577	62443734	-	0	0.107448	0.621781	0.2419	0	B3A	259
chr4	71617921	71621606	+	0	0	0.00533051	0	0	IAPLTR2b	260
chr4	78481250	78484681	-	0	0	0	0	0	IAPEY2_LTR	261
chr4	79228028	79232165	+	0	0	0	0	0	IAPEY_LTR	262
chr4	97241502	97242474	+	0	0	0	0	0.0186167	RLTR13B1	263
chr4	98155594	98156614	-	0	0	0	0	0	IAPLTR1a_Mm	264
chr4	100883813	100884220	+	0.488442	0.249658	1.44473	1.73302	0.887945	IAPLTR2a	265
chr4	100933118	100937980	-	0.0149017	0.003491	0.00808072	0.0117891	0.00372488	IAPLTR1a_Mm	266
chr4	103226525	103226950	-	0	0.0398515	0	0	0	IAPLTR2_Mm	267
chr4	105092496	105093370	+	0	0	0	0	0	RLTR13A1	268
chr4	106392770	106396428	-	0.00990258	0	0	0.0104455	0.0198022	IAPLTR1a_Mm	269
chr4	108284073	108291153	+	0.0255851	0.014385	0.0166487	0.00539756	0.0281394	IAPLTR1a_Mm	270
chr4	115605898	115606374	-	0.0379807	0.142363	0	0.040063	0.037975	IAPLTR2_Mm	271
chr4	117191869	117191979	-	0	0	0	0	0	PB1D7	272
chr4	118183359	118190584	-	0.0075215	0.0187952	0.00815732	0.0238016	0.00501359	IAPLTR1_Mm	273
chr4	129079308	129079424	-	0	0	0	0	0	MIRc	274
chr4	131909305	131909645	-	0.0531284	0	0.230478	0.0560412	0	IAPEY2_LTR	275
chr4	135455803	135462877	+	0.125473	0.122376	0.113863	0.0270107	0.0768088	IAPLTR1_Mm	276
chr4	138952184	138952577	+	0	0	0	0	0	IAPLTR2a	277
chr4	138952692	138953048	+	0	0	0	0	0	MTD	278
chr4	145456979	145460550	+	2.10483	1.95812	1.96923	1.84039	0.928017	IAPEY2_LTR	279
chr4	145591237	145591642	-	0	0	0.0483948	0	0	IAPLTR2_Mm	280
chr4	145633850	145637419	+	0.152242	0.118885	0.231156	0.0910003	0.111627	IAPEY2_LTR	281
chr4	145866347	145866661	-	0	0	0	0.182001	0.057505	IAPLTR2b	282
chr4	145881761	145889095	-	0.00246991	0.00694345	0.0107148	0.015632	0.00493908	IAPLTR1a_Mm	283
chr4	146062226	146064039	+	0.349552	0.205892	0.173303	0.358182	0.3495	IAPLTR2b	284
chr4	146184137	146186537	-	0.015091	0.0636362	0.0163667	0.0318368	0	MMERVK10C-int	285
chr4	147219403	147226971	+	0.0454774	0.0515874	0.0311507	0.0631195	0.0287183	MuLV-int	286
chr4	147268718	147272282	+	0.259174	0.214293	0.143297	0.128651	0.142271	IAPEY2_LTR	287
chr4	147308096	147308410	-	0	0	0	0	0.057505	IAPLTR2b	288
chr4	147467650	147473281	-	0.0643351	0.0422007	0.0209321	0.0237519	0.0160814	IAPLTR2b	289
chr4	147485530	147486050	-	0.0695462	0	0.0377126	0	0	LTRIS2	290
chr4	147741684	147745236	-	0.596584	0.520817	0.436874	0.430286	0.316092	IAPEY2_LTR	291
chr4	147833501	147840658	-	1.08073	1.17874	0.993668	1.01984	0.971753	IAPLTR1_Mm	292
chr4	150181980	150182412	+	0	0.0392072	0	0	0	IAPLTR2_Mm	293
chr4	155676612	155683809	-	0.0125846	0.0212268	0.0191078	0.0265491	0.027682	IAPLTR1_Mm	294
chr4	155923118	155925650	+	0	0.00670222	0	0	0.00715124	IAPLTR2a	295
chr5	6227963	6230825	-	0	0	0	0	0.00632696	IAPLTR2a2_Mm	296
chr5	12517090	12521147	-	0.0625024	0.0376517	0.0387349	0.0188369	0.0580294	IAPLTR1a_Mm	297
chr5	13857000	13859543	+	0	0	0	0	0	IAPLTR2a2_Mm	298
chr5	13859784	13864094	-	0.0126074	0.011814	0.00911541	0.0132986	0.0294128	IAPLTR1a_Mm	299
chr5	15011395	15016059	+	0.0310684	0.0291134	0.0252711	0.0286753	0.0232979	L1Md_A	300
chr5	18030025	18030426	-	0.0450666	0.0422307	0	0	0	IAPLTR2_Mm	301
chr5	21235417	21242602	-	0.00756336	0.0165373	0.00546849	0.00797804	0.00504149	IAPLTR1a_Mm	302
chr5	23726412	23730105	+	0	0	0	0.0103465	0	IAPLTR2a	303
chr5	25579273	25582724	-	0	0	0.00569185	0	0.0314845	IAPLTR2_Mm	304
chr5	29799860	29800772	-	0	0	0	0	0	RLTR13F	305
chr5	31755895	31756309	+	0.960407	1.26814	0.662833	1.10516	0.872968	IAPLTR2a	306
chr5	32578287	32578670	+	0	0	0	0	0	IAPLTR2a	307
chr5	37924352	37929080	+	0.026817	0.0323093	0.0207742	0.0121231	0.026813	IAPLTR1_Mm	308
chr5	40602603	40605383	-	0.0195434	0	0.00706518	0.00687165	0	IAPLTR2a	309
chr5	42070169	42070308	-	0	0	0	0	0	RLTR13B1	310
chr5	45829272	45829938	-	2.03712	1.85802	1.56126	2.17746	1.65661	RMER6C	311
chr5	50268138	50270616	+	0	0	0	0	0	IAPLTR2a2_Mm	312
chr5	52689817	52690246	-	0	0	0	0	0	RLTR44B	313
chr5	58416026	58416349	+	0	0	0	0	0	IAPEY2_LTR	314
chr5	59865122	59867106	-	0	0	0	0	0	IAPEY3_LTR	315
chr5	60848758	60849100	-	0	0	0	0	0	IAPLTR2b	316
chr5	64014794	64020101	+	0.194547	0.227081	0.244308	0.140409	0.255945	ETnERV-int	317
chr5	70646627	70650073	-	0.00525581	0.00492508	0.00570011	0	0	IAPLTR2a	318
chr5	74987842	74990535	+	0	0	0	0	0	IAPLTR2b	319
chr5	75305270	75310043	+	0.00379488	0	0	0.00400295	0	IAPLTR2_Mm	320
chr5	76275849	76279920	+	0.00444911	0.00416914	0	0	0.00444845	IAPLTR1a_Mm	321
chr5	76861078	76861191	+	0	0	0	0	0.158895	B1_Mus2	322
chr5	76861354	76862233	-	0	0	0.0223276	0	0	RLTR13A1	323
chr5	77749846	77756030	-	0.0175749	0.0247034	0.0285909	0.0401667	0.0380733	L1_Mus1	324
chr5	79817915	79822913	-	0.0579853	0.0305642	0.0157218	0.0305822	0.0289883	L1Md_T	325
chr5	89511248	89515301	+	0.00446886	0.00418765	0	0	0.0089364	IAPEY_LTR	326
chr5	91470092	91470979	-	0	0	0	0	0	RLTR13B1	327
chr5	92531659	92532036	-	0	0	0	0	0	IAPEY_LTR	328
chr5	94797795	94804897	-	0.0331576	0.0334611	0.0221296	0.00807126	0.0204016	IAPLTR1_Mm	329
chr5	96296747	96297198	+	0	0	0	0	0	IAPLTR2a2_Mm	330
chr5	100740622	100747703	-	0.00767443	0.00239717	0.0166464	0.013492	0	IAPLTR1a_Mm	331
chr5	100905498	100905832	+	0	0	0	0	0	IAPEY_LTR	332
chr5	103385356	103385669	+	0	0	0	0	0	IAPEY_LTR	333
chr5	103406691	103409263	-	0	0	0	0	0	IAPLTR2a2_Mm	334
chr5	103935823	103936165	+	0	0	0	0	0	IAPEY_LTR	335
chr5	103946438	103950964	-	0.00400194	0	0.00434024	0	0	IAPEY_LTR	336
chr5	104188312	104192373	-	0	0	0	0	0	IAPLTR2b	337
chr5	104361378	104369626	+	0.00439248	0.00205804	0	0.00231665	0.00219591	IAPEY_LTR	338
chr5	104740338	104742100	-	0.0205522	0.0192589	0.0668688	0	0	ERVB4_2-I_MM-int	339
chr5	104921444	104928902	+	0	0.00227601	0.00263417	0	0	MURVY-int	340
chr5	105419335	105424706	-	0.0101173	0.0126409	0.0146301	0.00711469	0.0101158	IAPLTR1_Mm	341
chr5	105724153	105729395	-	0.0449205	0.0291418	0.0374753	0.029159	0.0552785	IAPLTR1_Mm	342
chr5	109801256	109802089	+	0	0	0.0235591	0	0	RLTR13F	343
chr5	109891374	109892277	-	0	0.0187796	0.0434696	0.0422789	0.0400754	IAPLTR2_Mm	344
chr5	109901525	109907273	-	0.0157565	0.0206709	0.054683	0.0332407	0.0661673	RLTR4_MM-int	345
chr5	109934027	109937359	-	0.00543558	0.0101871	0.0176852	0.00573359	0.0271738	IAPLTR2a2_Mm	346
chr5	112902792	112906334	-	0	0.0191665	0	0	0	IAPEY2_LTR	347
chr5	123941257	123942915	-	0.152884	0.32746	0.248712	0.161266	0.185618	ETnERV-int	348
chr5	124271343	124274934	+	0.0100873	0	0	0.00532017	0.0252145	IAPLTR2_Mm	349
chr5	137996341	137999399	+	0.112527	0.183142	0.134885	0.0312358	0.00592157	MMERVK9C_I-int	350
chr5	138209975	138218192	-	0.00661357	0.0020658	0.00239088	0	0	IAPEY3-int	351
chr5	138331493	138335185	+	0.0686799	0.0689551	0.0425633	0.0103493	0.0686697	IAP1-MM_I-int	352
chr5	139211313	139211774	+	1.09799	1.10239	1.31839	1.19955	0.901784	IAPLTR2_Mm	353
chr5	140529819	140534945	-	0.0106008	0.00662248	0.0153293	0	0.0247315	IAPLTR2_Mm	354
chr5	142065858	142069615	-	0	0	0	0	0	IAPLTR2_Mm	355
chr5	143207237	143207684	-	0	0	0	0	0	IAPLTR2_Mm	356
chr5	143413216	143413350	+	3.62336	3.64685	2.76531	1.98178	1.61014	RSINE1	357
chr5	144861563	144865920	+	0.128871	0.0973883	0.229936	0.0964712	0.133008	IAPLTR2_Mm	358
chr5	147807991	147811288	-	0	0.00514758	0.0119153	0.0115889	0	IAPLTR2_Mm	359
chr5	148148997	148149419	-	0	0	0	0	0	IAPLTR2_Mm	360
chr6	3291638	3291997	+	0	0	0	0	0	IAPLTR1_Mm	361
chr6	3557005	3557943	+	0.405167	0.397751	0.439418	0.732654	0.443689	RLTR13G	362
chr6	5216696	5217583	-	0.0816071	0.0382359	0.0663793	0.064561	0.142791	RLTR13B1	363
chr6	5327301	5332002	-	0.023118	0.00722107	0.00835741	0.00406424	0.00770484	IAPLTR1a_Mm	364
chr6	5676602	5676921	+	0	0	0	0	0	IAPLTR2b	365
chr6	10337325	10341183	+	0.0281681	0	0.00509155	0	0.014082	IAPLTR2b	366
chr6	10360525	10361347	-	0	0	0.0477479	0	0	RLTR13B2	367
chr6	18859723	18860131	-	0	0	0	0	0	IAPLTR2_Mm	368
chr6	21843971	21845489	+	0	0	0	0.0125807	0	IAPLTR2a2_Mm	369
chr6	21845489	21845586	-	0.184865	0	0	0	0	RLTR10	370
chr6	31643866	31644249	+	0.0943582	0.0442102	0.255837	0	0.0943442	IAPLTR2a	371
chr6	33743650	33749177	+	0.219577	0.181192	0.26302	0.179762	0.239206	IAPLTR1a_Mm	372
chr6	35718504	35722048	-	0.010221	0.0143668	0	0	0	IAPEY2_LTR	373
chr6	37709615	37710077	+	0.234775	0.623336	0.212184	0.165098	0.0391233	IAPLTR2a2_Mm	374
chr6	38276438	38283024	-	0.0110015	0.0386596	0.0149144	0.00580236	0.00549995	IAPLTR1a_Mm	375
chr6	38934374	38934750	-	0.0961102	0	0.104235	0	0	IAPEY_LTR	376
chr6	39324262	39324599	+	0	0	0	0	0	IAPLTR2a2_Mm	377
chr6	49485057	49486918	+	0.0875677	0.0364699	0.158284	0.0205264	0.0486415	MMERVK9E_I-int	378
chr6	52348393	52351051	-	0.0476937	0.0191539	0.00738935	0.00718694	0.0136247	IAPLTR2_Mm	379
chr6	55184086	55188654	-	0.0237909	0.0148625	0.0172014	0.00418255	0.00396456	IAPEY_LTR	380
chr6	58245134	58248059	-	0	0	0	0	0	IAPEY2_LTR	381
chr6	59240875	59241280	+	0.0446226	0	0	0	0.178464	IAPLTR2a2_Mm	382
chr6	60549178	60552866	-	0	0.00460199	0	0	0	ERVB4_1B-I_MM-int	383
chr6	61337229	61340080	-	0	0	0	0.00670058	0	IAPLTR2_Mm	384
chr6	65070856	65071139	+	2.55166	3.04864	2.49063	1.68222	2.87019	B4A	385
chr6	68591836	68594374	+	0.0071354	0	0	0	0	IAPLTR2b	386
chr6	69119039	69126496	-	0	0	0	0.00256236	0	IAPEY2_LTR	387
chr6	70691707	70696193	-	0	0	0	0	0	IAPEY_LTR	388
chr6	71955426	71960760	-	0.0679167	0.0540964	0.0626093	0.0429842	0.10186	IAPLTR1_Mm	389
chr6	72038650	72039402	-	0	0	0	0	0	RLTR13C2	390
chr6	81864527	81869068	-	0	0	0	0	0	IAPEY_LTR	391
chr6	84283389	84286200	-	0	0	0	0	0	IAPLTR2a2_Mm	392
chr6	87950775	87952439	+	0.0217619	0	0	0	0.0108793	RLTR10-int	393
chr6	87952511	87952885	-	0	0	0	0	0	IAPEY_LTR	394
chr6	88581446	88581865	+	0.776433	1.05094	0.935632	0.773503	1.25073	IAPLTR2_Mm	395
chr6	97372256	97379449	+	0.0151099	0.0141591	0.0191184	0.00796917	0.0125897	IAPLTR1_Mm	396
chr6	103215384	103218028	+	0	0	0	0	0	IAPLTR2a	397
chr6	112192457	112192769	-	0	0	0	0	0	IAPLTR2b	398
chr6	119203024	119203395	-	0	0	0	0	0	IAPLTR2a2_Mm	399
chr6	119873046	119875867	-	0.00641984	0.00601585	0.0139251	0	0.00641888	IAPLTR2a2_Mm	400
chr6	120087915	120088300	-	0.0469347	0.0439812	0	0.0990159	0	IAPLTR2a2_Mm	401
chr6	120812261	120817386	+	0.0212057	0.0264951	0.0306645	0	0.0141351	IAPLTR2_Mm	402
chr6	121570662	121574647	+	0	0	0	0	0	IAPEY2_LTR	403
chr6	124599848	124602033	-	0	0	0	0	0	MMERVK9E_I-int	404
chr6	124606455	124610169	+	0	0	0	0	0	IAPEY3-int	405
chr6	128644539	128644840	-	0	0	0	0	0	RLTR13B1	406
chr6	133267046	133267486	+	0	0	0	0	0	IAPLTR2_Mm	407
chr6	133401245	133407648	-	0	0.00265096	0.00306813	0.00596816	0.00282856	IAPLTR2b	408
chr6	136482446	136482856	-	0	0	0	0	0.0440732	RMER19A	409
chr6	139531216	139533767	+	0	0	0	0	0	IAPLTR2a2_Mm	410
chr6	140311339	140311777	+	0	0	0	0	0	IAPLTR2a2_Mm	411
chr6	141036979	141037279	-	0	0	0	0	0	IAPEY2_LTR	412
chr6	142986047	142986930	-	0	0.0192045	0.111133	0.0864709	0.163928	RLTR13B1	413
chr6	146695111	146695289	-	0	0	0	0	0	B3	414
chr7	3481096	3481416	+	0	0	0	0	0	IAPLTR2b	415
chr7	6616297	6624530	+	0.00880096	0.00412357	0	0	0	IAPEY_LTR	416
chr7	7018941	7021960	-	0.143974	0.134914	0.110603	0.0696062	0.137955	ETnERV-int	417
chr7	10775523	10775984	+	0	0	0	0	0	IAPLTR2_Mm	418
chr7	10939527	10940714	-	0	0	0	0	0	IAPEY_LTR	419
chr7	10946267	10949996	-	0	0	0	0	0	IAP1-MM_I-int	420
chr7	11331568	11332756	-	0	0	0	0	0	IAPEY_LTR	421
chr7	13311512	13311598	+	8.95427	8.58593	6.32358	10.9828	10.8268	Charlie5	422
chr7	14298919	14299247	-	0	0	0	0	0	RLTR13G	423
chr7	23307960	23315547	-	0	0	0	0	0	RLTR6-int	424
chr7	24248354	24249189	+	0	0	0	0	0	RLTR13F	425
chr7	24578165	24584130	-	0.00607334	0.0113823	0.0197603	0.0224221	0.0121449	IAPLTR1_Mm	426
chr7	26863260	26863903	-	0	0	0	0	0	IAPEY_LTR	427
chr7	27139637	27140522	-	0	0	0	0	0	RLTR13B1	428
chr7	27780636	27782419	+	0.0101551	0.0570966	0.0770953	0.0107119	0.0203073	ETnERV2-int	429
chr7	28220275	28221166	-	0	0	0	0	0	RLTR13B1	430
chr7	29731614	29734616	+	0	0	0	0	0	RLTR6-int	431
chr7	30927773	30934314	-	0.0138465	0.0129752	0.0240272	0.0116845	0.0166133	IAPLTR1a_Mm	432
chr7	31490131	31490472	-	0	0	0	0	0	RLTRETN_Mm	433
chr7	31762811	31763163	-	0	0	0	0	0	RLTR6-int	434
chr7	34178311	34178639	+	0.0550662	0	0	0	0	IAPLTR2b	435
chr7	41671866	41672196	+	0.0547335	0	0	0.115469	0	IAPEY_LTR	436
chr7	42796947	42797212	-	0.817298	0.446756	0.221597	0.0718423	0.408588	L1_Mus4	437
chr7	42834418	42835423	+	0	0	0.0390622	0	0.0360121	RLTR13A3	438
chr7	42881740	42882065	+	0	0	0	0	0.0555647	IAPLTR2b	439
chr7	42888736	42891617	+	0.00628618	0.00589061	0.0204528	0.00663083	0	IAPLTR2a2_Mm	440
chr7	42968891	42969366	+	0	0	0	0	0	RLTR48B	441
chr7	43128833	43129217	+	0.658792	0.617336	0.45931	0.496365	0.611644	IAPEY_LTR	442
chr7	43149107	43149498	-	0	0	0	0	0	IAPLTR2a	443
chr7	44180081	44186437	-	0	0	0.00309081	0	0.00284947	ETnERV-int	444
chr7	44802319	44803245	+	0.0195434	0	0	0	0	RLTR13B1	445
chr7	52163778	52164702	+	0	0	0	0	0.0391656	RLTR13G	446
chr7	52730772	52730916	-	0	0	0	0	0.124925	RLTR13C2	447
chr7	55946767	55953945	+	0.0227122	0.021283	0.0355798	0.0319433	0.00756961	IAPLTR1a_Mm	448
chr7	57220711	57223551	+	0	0	0.00691597	0	0.0127519	IAPLTR2_Mm	449
chr7	63803669	63810764	+	0.0280841	0.0215319	0.0276892	0.0296238	0.0204217	IAPLTR1a_Mm	450
chr7	67356691	67356827	+	0	0	0	0	0	RSINE1	451
chr7	75810485	75817612	+	0.0101665	0.00952679	0.00551298	0.00804296	0.010165	IAPLTR1a_Mm	452
chr7	79336942	79337062	-	0	0	0	0.157934	0	ID_B1	453
chr7	80920725	80921630	+	0.0199964	0.0374762	0	0	0	RLTR13F	454
chr7	83333132	83336639	-	0.00516442	0.00483943	0	0.00544757	0	IAPEY2_LTR	455
chr7	84223465	84225815	-	0	0	0	0	0	IAPLTR2a	456
chr7	85285514	85285862	-	0	0	0	0	0	RLTR10	457
chr7	89273141	89276993	+	0.00940398	0.00440611	0.00509947	0.00991958	0.00940259	IAPLTR1a_Mm	458
chr7	94917845	94920606	-	0	0.00614654	0.00711379	0.00691892	0.00655832	IAPLTR2a2_Mm	459
chr7	96317607	96324708	-	0.00510188	0.0143425	0.00829975	0.0215264	0.00510112	IAPLTR1a_Mm	460
chr7	101568145	101570789	+	0	0.00641842	0	0	0	IAPLTR2a	461
chr7	106561081	106563754	+	0	0	0	0	0	IAPEY5_LTR	462
chr7	106658069	106664455	-	0.0283651	0.0531603	0.0123052	0.0239362	0.0255248	ETnERV-int	463
chr7	107264409	107271489	-	0.010234	0.00959002	0.0138739	0.00269878	0.0179069	IAPLTR1_Mm	464
chr7	108304955	108306022	-	0	0	0	0	0	RLTR13E	465
chr7	108376009	108376346	-	0.1072	0.050227	0.058131	0	0.053592	IAPLTR1a_Mm	466
chr7	112430204	112434774	-	0	0.011142	0.00859693	0.00836144	0.00792566	IAPLTR1a_Mm	467
chr7	127618672	127626128	+	0.0218655	0.0250428	0.0131744	0.0153762	0.0291497	IAPLTR2_Mm	468
chr7	131995587	131999740	-	0.0392516	0.0122605	0.00945993	0.0138012	0.0174425	IAPLTR1a_Mm	469
chr7	134001971	134004901	+	0	0	0	0	0.0185405	IAPLTR1a_Mm	470
chr7	142214895	142220743	-	0.0216819	0.0145125	0.00671851	0	0.00619391	IAPLTR1_Mm	471
chr8	3803695	3805689	+	0	0	0	0	0	IAPEY3_LTR	472
chr8	3829621	3831263	+	0.0661599	0.0309983	0.0119588	0.0348936	0.0441	ETnERV-int	473
chr8	4388565	4388984	-	0	0	0	0	0	RLTR13B1	474
chr8	4440774	4447240	-	0.00280142	0.0078754	0.00911471	0.00591002	0.002801	L1Md_F2	475
chr8	5941829	5945453	+	0	0	0	0	0	MMERVK10C-int	476
chr8	9947237	9947558	+	0	0	0	0	0	IAPLTR2b	477
chr8	11605721	11609073	-	1.08063	1.17465	1.36536	1.29946	1.30197	RLTR44E	478
chr8	18575238	18580058	-	0.0638841	0.0563426	0.0529823	0.0396392	0.0864186	IAPLTR1_Mm	479
chr8	19389592	19392424	+	0	0	0	0.00674552	0	IAPEY_LTR	480
chr8	19492102	19492908	+	0.0673486	0	0	0	0.0224462	L1Md_F3	481
chr8	22551167	22558293	+	0.571948	0.666969	0.631325	0.681066	0.515948	IAPLTR1_Mm	482
chr8	33487597	33488185	+	0	0	0	0	0	RLTR10-int	483
chr8	37382201	37390379	-	0	0	0.00240228	0	0.00221471	IAPEY_LTR	484
chr8	40418817	40419620	+	0	0	0	0	0	RLTR13C2	485
chr8	44746847	44749076	+	0	0	0	0.00856953	0	IAPLTR2a2_Mm	486
chr8	45442914	45446844	+	0.00460869	0.00431868	0	0	0.00460801	IAPLTR2_Mm	487
chr8	47794532	47798546	-	0.135368	0.0887949	0.127237	0.176108	0.207534	IAP-d-int	488
chr8	51129760	51132709	-	0	0	0.0133209	0	0	IAPEz-int	489
chr8	51731584	51735734	-	0	0	0.0236669	0.0230186	0.0174552	IAPEY_LTR	490
chr8	51863111	51863420	+	0	0	0	0	0	RLTR10F	491
chr8	55526289	55529300	-	0.00601487	0	0	0	0	IAPLTR2a2_Mm	492
chr8	60998978	61006063	-	0.0204536	0.0143749	0.0110913	0.00539375	0.00511264	IAPLTR1a_Mm	493
chr8	61738814	61740473	+	0.29467	0.265901	0.284071	0.138145	0.360099	ETnERV-int	494
chr8	62214916	62215276	+	0	0	0	0	0	IAPEY_LTR	495
chr8	67420363	67420780	+	0	0	0	0	0	IAPLTR2_Mm	496
chr8	67603661	67607045	+	0	0	0	0	0.00535128	IAPLTR2b	497
chr8	69500282	69507466	-	0.00504294	0.0023628	0.00546925	0.00265972	0.0126055	IAPLTR2b	498
chr8	69728306	69728894	+	0.123034	0.201761	0.0667174	0.162225	0.030754	IAPLTR2_Mm	499
chr8	71446842	71447169	-	0	0	0	0	0	IAPEY_LTR	500
chr8	73246216	73253802	+	0.00955148	0.011188	0.00258973	0.00755637	0.00477503	RLTR6-int	501
chr8	77449377	77449516	-	0.388217	0	0	0.1365	0.258773	B4A	502
chr8	81122189	81125411	-	0	0	0	0	0	IAPEz-int	503
chr8	85126428	85128505	-	0	0.00816975	0.00945538	0.0183927	0.00871708	RLTR4_MM-int	504
chr8	85128498	85131668	-	0.0114265	0.021415	0.024785	0.0180795	0.0285621	RLTR4_MM-int	505
chr8	85687106	85687434	-	0.605728	0.51601	0.895818	0.406597	0.385406	IAPEY2_LTR	506
chr8	90772436	90776878	-	0	0	0	0	0.00407699	IAPLTR2b	507
chr8	91740847	91743670	-	0	0	0	0	0	IAPLTR2a2_Mm	508
chr8	94616511	94621872	-	0.0777109	0.079153	0.0586297	0.0213839	0.0675647	IAPLTR1_Mm	509
chr8	100988591	100992546	-	0	0	0	0	0	IAPLTR2b	510
chr8	101963783	101966907	-	0	0.00543255	0	0.00611522	0.00579651	IAPLTR2a2_Mm	511
chr8	104269651	104272912	-	0	0.0104088	0	0	0	IAPLTR2b	512
chr8	106477247	106477340	+	0	0	0	0	0	PB1D10	513
chr8	114329824	114330399	-	0	0	0	0	0	IAPLTR2a	514
chr8	116896265	116903426	+	0.0101183	0.0213335	0.0246907	0.0160095	0.0151752	IAPLTR1a_Mm	515
chr8	123426326	123434006	-	0	0.00221022	0	0	0.0023583	MuLV-int	516
chr8	124120287	124125311	+	0	0.00675691	0.0117303	0.003803	0.0144192	IAPLTR2_Mm	517
chr8	125644363	125644802	+	0	0	0	0	0	IAPLTR2_Mm	518
chr8	125695956	125696472	+	0.105126	0.164185	0	0.0739267	0.0350369	L1MCa	519
chr8	126606369	126606696	-	0	0	0.0599033	0	0	IAPEY_LTR	520
chr8	126630821	126632437	-	0	0.0104989	0	0	0	IAP-d-int	521
chr8	129267642	129268160	+	2.12933	2.71497	2.49862	2.02515	1.8149	MMVL30-int	522
chr9	3141504	3144280	+	0	0	0	0	0	IAPLTR2a2_Mm	523
chr9	5923025	5926646	+	0	0	0	0	0	IAP1-MM_I-int	524
chr9	6805326	6812989	+	0	0	0	0	0.00236353	RLTR6-int	525
chr9	8115076	8119817	+	0	0.00358008	0.00414346	0.00402996	0.00381993	MMERGLN-int	526
chr9	9315279	9316085	-	0	0	0	0	0	RLTR13C2	527
chr9	13754235	13758401	-	0.760844	0.53778	0.844022	0.169684	0.213005	IAPEY_LTR	528
chr9	19464984	19465288	-	0	0	0	0	0	IAPLTR2b	529
chr9	20574164	20574513	+	0	0	0	0	0	IAPLTR1a_Mm	530
chr9	21879186	21886249	+	0.0128233	0.0144196	0.0194703	0.0135264	0.00769285	IAPLTR1a_Mm	531
chr9	37331368	37338476	+	0.0331296	0.0262687	0.0331663	0.0215052	0.0229324	IAPLTR1_Mm	532
chr9	37338476	37339422	-	1.56872	1.63134	1.92956	1.15024	0.937265	ORR1B2-int	533
chr9	38413087	38413788	+	0	0	0	0.0272223	0	IAPEY_LTR	534
chr9	38414177	38417900	+	0.0340541	0.0227937	0.0369328	0.0102632	0.0097283	IAPEY_LTR	535
chr9	46575367	46575729	+	0	0.0935357	0	0	0.0499011	IAPEY_LTR	536
chr9	48102638	48103075	-	0	0	0	0	0.0413564	IAPLTR2a2_Mm	537
chr9	54001646	54006096	-	0	0.00381414	0	0	0.00813933	IAPEY_LTR	538
chr9	55769755	55776015	-	0.138892	0.135575	0.134943	0.146507	0.0983675	L1Md_A	539
chr9	57369554	57373390	+	0.023608	0.00884896	0.0256037	0.00996094	0.0236045	MMERVK10D3_I-int	540
chr9	58778376	58785685	+	0.042132	0.0301912	0.0322544	0.0104569	0.0148679	IAPLTR1_Mm	541
chr9	60459318	60459661	+	0	0	0	0	0	IAPLTR2b	542
chr9	67648453	67651170	-	0	0	0	0	0.00666449	IAPLTR2a2_Mm	543
chr9	71488713	71489121	-	0.132886	0	0	0	0.132866	IAPLTR2a	544
chr9	72242814	72249726	-	0.123172	0.0761289	0.108004	0.10781	0.104812	IAPEY4_I-int	545
chr9	77331846	77334415	+	0.021148	0.00660573	0.030581	0.0669224	0.00704828	IAPLTR2a	546
chr9	81256282	81256854	-	0	0	0	0	0	IAPLTR2a2_Mm	547
chr9	85634721	85635450	+	0	0	0	0	0.0248138	RLTR13G	548
chr9	85916602	85919387	-	0	0	0.0070525	0	0	IAPLTR2a	549
chr9	87190382	87190766	+	0.0470566	0	0	0	0.141149	RLTR44A	550
chr9	88001881	88002223	+	0	0	0	0	0	IAPLTR2b	551
chr9	88323534	88323868	-	0	0	0	0	0.0540719	IAPLTR1a_Mm	552
chr9	89405313	89411785	-	0.00839647	0.0131135	0.0151771	0.00295227	0.00559681	L1Md_F2	553
chr9	92514935	92520287	+	0	0.00951433	0.00367052	0	0	MMERVK9C_I-int	554
chr9	92935931	92936000	-	0	0	0	0	0	IAPEY2_LTR	555
chr9	93390520	93391013	-	0.0366736	0	0	0	0	IAPEY2_LTR	556
chr9	96155837	96156410	-	0	0	0.0342304	0.0665856	0	IAPLTR2_Mm	557
chr9	96487240	96488128	+	0.142652	0	0.0221015	0.0214961	0.0407516	RLTR13B1	558
chr9	98451403	98458568	-	0.00252816	0	0.00274187	0	0.00505556	IAPLTR1a_Mm	559
chr9	109572729	109577027	-	0.00421418	0.003949	0.0137113	0.00889047	0.00421356	RLTR45-int	560
chr9	110970448	110975866	-	0.0401183	0.0219297	0.0217549	0.0317384	0.0267416	IAPLTR1_Mm	561
chr9	114033997	114034338	-	0.52973	0.595675	0.172353	0.111755	0.0529652	IAPLTR2b	562
chr9	114205361	114209005	-	0	0	0	0	0	IAPLTR2b	563
chr9	116441996	116446156	+	0.00870789	0.0203998	0.0613861	0.0229633	0.0304731	IAPLTR1a_Mm	564
chr9	117979817	117983399	+	0	0	0.00548375	0	0	IAPEY2_LTR	565
chr9	118208442	118211292	+	0	0	0	0.0134059	0	IAPLTR2a	566
chr9	121322377	121328483	-	0.0444984	0.022239	0.0128693	0.0125168	0.0355934	IAPLTR1_Mm	567
chr10	4462095	4462566	-	0	0.215806	0	0	0.0383773	IAPLTR2_Mm	568
chr10	7241288	7243979	+	0	0	0	0	0.00672886	IAPLTR2b	569
chr10	9847031	9851789	+	0.0152274	0.00713458	0.0247719	0.0120467	0	IAPLTR1a_Mm	570
chr10	15935273	15937949	+	0	0	0	0	0	IAPLTR2a2_Mm	571
chr10	16248662	16248874	+	0	0	0	0	0	RLTR13C2	572
chr10	18024647	18024984	+	0	0.050227	0.058131	0	0	IAPLTR1a_Mm	573
chr10	18239109	18241775	+	0.0815153	0.0891167	0.0957734	0.0644884	0.0271677	IAPLTR2a	574
chr10	29010288	29014270	-	0	0.0042623	0	0	0	IAPLTR2_Mm	575
chr10	31702251	31705649	+	0	0	0	0	0	IAPEY_LTR	576
chr10	37923475	37923876	+	0	0	0	0	0	IAPLTR2a2_Mm	577
chr10	38225793	38226011	+	0	0	0	0	0	RLTR13B4	578
chr10	39760777	39764747	-	0.0136868	0.00855036	0	0	0	IAPLTR2_Mm	579
chr10	39978948	39979769	+	0	0	0	0	0	RLTR13C3	580
chr10	40322129	40325051	+	0.0557821	0.133584	0.0873854	0.039227	0.10535	ETnERV-int	581
chr10	40325921	40326093	+	0	0	0	0	0	B2_Mm1t	582
chr10	40562037	40565604	-	0.0101551	0.0142742	0.0165204	0.00535596	0	IAPEY2_LTR	583
chr10	41398995	41399332	+	0	0	0	0	0	IAPEY2_LTR	584
chr10	41775798	41776389	+	0.306027	0.315446	0.398276	0.0968415	0.0917944	ERVB4_2-I_MM-int	585
chr10	41798063	41803525	-	1.50559	1.59419	1.53935	1.24882	1.05773	RLTR6-int	586
chr10	41952571	41953001	+	0	0	0	0	0	IAPLTR2_Mm	587
chr10	42670254	42671323	+	0.0169316	0	0	0	0	RLTR13E	588
chr10	43877086	43880052	+	0.00610609	0	0	0.0257635	0.00610519	IAPLTR2a	589
chr10	45213264	45213592	-	0	0	0	0	0	IAPEY2_LTR	590
chr10	48032205	48034991	-	0	0	0	0	0	IAPLTR2a2_Mm	591
chr10	48750920	48754458	-	0	0	0	0	0	IAPLTR2b	592
chr10	53472439	53472825	-	0	0	0	0	0	IAPLTR2a	593
chr10	54886739	54891054	+	0.0125928	0.00393344	0.0136573	0	0.00419696	IAPEY_LTR	594
chr10	56509696	56514818	+	0.00353636	0.00331383	0	0	0.00353584	L1Md_F2	595
chr10	57234750	57235536	-	0	0	0	0	0	RLTR13C2	596
chr10	63111382	63111527	+	0	0	0	0	0	B1F	597
chr10	66711421	66711781	-	0.050185	0.047027	0	0	0.100355	RLTR44A	598
chr10	66722483	66729602	-	0.00508898	0.0309968	0.0165575	0.021472	0.0152647	IAPLTR1a_Mm	599
chr10	66767043	66767371	+	0	0	0	0	0	RLTR23	600
chr10	68410972	68411428	+	0	0	0	0	0	IAPLTR2a2_Mm	601
chr10	73854723	73857451	-	0.00663861	0.00622086	0	0.00700259	0	IAPLTR2a2_Mm	602
chr10	76920017	76923923	+	0	0	0.00502899	0	0.00463632	IAPLTR2_Mm	603
chr10	77807884	77809720	-	0	0	0	0	0	IAPLTR2_Mm	604
chr10	78499588	78499821	-	0	0	0	0	0	RLTR13B1	605
chr10	82571374	82575188	-	0.00474883	0	0	0	0	IAPLTR2a	606
chr10	83900354	83901027	+	0	0	0	0	0	RLTR17	607
chr10	87509142	87509764	-	0	0	0	0	0	IAPLTR2_Mm	608
chr10	87938583	87938898	-	0	0	0	0	0	IAPLTR2b	609
chr10	87978742	87979146	+	0	0	0	0	0	IAPLTR2a	610
chr10	88650912	88658064	+	0.0253275	0.0261071	0.0357092	0.0213729	0.020259	IAPLTR1a_Mm	611
chr10	92750546	92754151	-	0	0.00470791	0.00544877	0	0	IAPLTR1a_Mm	612
chr10	94362587	94369250	-	0.00543721	0	0.00884526	0.00286766	0.0054364	IAPEz-int	613
chr10	94536212	94536617	-	0	0	0	0	0	IAPLTR2_Mm	614
chr10	94693156	94695213	-	0.0176062	0.0247474	0.0190945	0.00928574	0.00880179	IAP1-MM_I-int	615
chr10	95374136	95374561	+	0.127583	0	0	0	0	IAPLTR2_Mm	616
chr10	99098192	99103428	-	0.0657282	0.0486254	0.0675327	0.0985243	0.0691773	IAPEz-int	617
chr10	104577280	104577956	-	0	0	0	0	0	IAPLTR2a2_Mm	618
chr10	111000000	111002909	+	0	0	0.00675198	0	0	IAPLTR2_Mm	619
chr10	122028625	122028993	-	1.5711	1.01216	0.958452	0.725043	0.883614	MTD	620
chr10	122505667	122512843	+	0.0126214	0.00473087	0.00821302	0.0106507	0.00252391	IAPEz-int	621
chr10	127792391	127795861	+	0.0208779	0.00489102	0.0169821	0.0110113	0.0104374	IAPEY2_LTR	622
chr10	127829524	127829922	-	0	0	0	0	0	IAPLTR2a2_Mm	623
chr11	4048949	4049321	+	1.3114	1.77505	1.42226	0.563568	0.437069	IAPLTR1_Mm	624
chr11	5362613	5362950	+	0	0	0.058131	0	0	IAPLTR1a_Mm	625
chr11	6531472	6535919	+	0.146629	0.164119	0.220866	0.0644449	0.0570138	IAPLTR2_Mm	626
chr11	6787973	6788383	-	0	0	0	0	0	IAPLTR2_Mm	627
chr11	6791834	6798059	-	0.0581972	0.054535	0.0473376	0.10129	0.113468	L1Md_F2	628
chr11	6798176	6800267	+	0.00866003	0.00811507	0	0	0	IAPEz-int	629
chr11	7180198	7180981	+	0	0	0.0250616	0	0	RLTR13B4	630
chr11	7841908	7843416	-	0	0	0	0	0	RLTR10-int	631
chr11	9084762	9087395	-	0.00687805	0.0193357	0	0.00725515	0.00687703	IAPLTR2_Mm	632
chr11	9882685	9890196	-	0	0	0	0.00254394	0	RLTR6-int	633
chr11	10612065	10612909	-	0	0	0	0	0	RLTR13D6	634
chr11	10627308	10629297	+	0	0	0	0	0	IAPEY_LTR	635
chr11	11389463	11392813	+	0.00540638	0.0253308	0.00586341	0.0114056	0.0162167	IAPEY2_LTR	636
chr11	12521845	12522721	-	0	0	0	0	0	RLTR13B1	637
chr11	12569460	12569926	+	0	0	0	0	0	IAPLTR2_Mm	638
chr11	12569926	12572837	-	0.00622142	0	0	0	0	ERVB5_1-I_MM-int	639
chr11	13358449	13358816	-	0	0	0	0	0	IAPEY_LTR	640
chr11	13872870	13875839	+	0.0121998	0.00571607	0	0	0	IAPLTR2a2_Mm	641
chr11	14896618	14900061	-	0	0	0.00570507	0	0	IAPLTR2a	642
chr11	15282448	15288178	-	0	0.00296226	0.00685684	0.00333451	0.00316072	IAPLTR2_Mm	643
chr11	15859815	15862739	+	0	0.011608	0	0	0	IAPLTR2a2_Mm	644
chr11	16359104	16359422	-	0	0	0	0	0	IAPEY_LTR	645
chr11	17152602	17152969	-	0.0492304	0.0461324	0.213568	0.311577	0.196892	IAPLTR1_Mm	646
chr11	20181583	20182002	+	0.905839	0.404208	1.12276	0.409501	0.0431288	IAPLTR2a	647
chr11	20516395	20521191	+	0.0415436	0.0460074	0.0368636	0.0239025	0.0226568	IAPLTR1_Mm	648
chr11	21596949	21597372	+	0.384554	0.0400395	0.231701	0.135213	0.256331	IAPLTR2_Mm	649
chr11	21779475	21779870	+	0.457494	0.0428705	0.396935	0.144773	0.228713	IAPLTR2a	650
chr11	22577700	22583033	+	0.0135859	0.0541066	0.0331523	0.0214961	0.00339597	IAPLTR1_Mm	651
chr11	22730601	22731485	+	0	0	0.0222014	0	0	RLTR13B1	652
chr11	22750188	22750508	-	0	0	0.122419	0	0	IAPEY2_LTR	653
chr11	27609680	27616059	-	0.261245	0.353904	0.240214	0.260592	0.411684	ETnERV-int	654
chr11	29164401	29166632	-	0.0324673	0.106485	0.167257	0.0342474	0.0324625	IAPLTR2a2_Mm	655
chr11	29280144	29283071	+	0	0.00579806	0	0.0130533	0	IAPLTR2_Mm	656
chr11	30318429	30318852	+	0	0	0	0	0	IAPLTR2a2_Mm	657
chr11	30742417	30742766	+	0	0	0.0561379	0	0	IAPLTR2b	658
chr11	31030229	31030744	-	0	0	0	0	0	IAPLTR2a2_Mm	659
chr11	31447447	31454839	-	0.0171537	0.00688898	0.00265769	0.0103395	0.00490033	IAPLTR2_Mm	660
chr11	31774152	31777140	+	0.00606115	0	0.00657353	0	0.00606025	IAPLTR2a2_Mm	661
chr11	31806413	31806883	-	0.0384645	0	0.0417161	0	0	IAPLTR2_Mm	662
chr11	38490165	38490960	+	0	0	0	0	0	RLTR13C2	663
chr11	44384307	44387034	+	0	0	0	0.00700515	0	IAPLTR2a2_Mm	664
chr11	49445501	49451883	+	0.891222	1.1942	1.12971	0.619737	1.33947	ETnERV-int	665
chr11	51143715	51151955	-	0.00659511	0	0.0190737	0.0023189	0	IAPEY3-int	666
chr11	51665045	51670218	-	1.55467	1.66027	1.59875	1.70269	3.18239	IAPLTR1_Mm	667
chr11	52611872	52612255	-	0	0	0	0	0	IAPEY_LTR	668
chr11	54576586	54583698	-	0.010188	0.00954688	0.00828691	0.00805992	0.0127331	IAPLTR1a_Mm	669
chr11	56250179	56251031	-	0	0	0	0	0	RLTR13A1	670
chr11	56293776	56297383	+	0.00502128	0.0047053	0	0.00529658	0.00502053	IAPEY2_LTR	671
chr11	58521671	58522234	-	0	0	0	0	0	IAPLTR2a2_Mm	672
chr11	61304744	61305077	+	0.0542418	0	0	0	0	IAPLTR1a_Mm	673
chr11	62798236	62798593	+	0.101211	0.0948421	0.16465	0	0	RLTR10D2	674
chr11	63467716	63474891	+	0.0353449	0.0189261	0.0136903	0.0106522	0.0126213	IAPLTR1_Mm	675
chr11	65862977	65863845	+	0	0	0	0	0	RLTR13A1	676
chr11	70361057	70361419	+	0	0	0	0	0	ERVB7_2-LTR_MM	677
chr11	70361436	70363846	+	0	0	0	0	0	MMERVK9C_I-int	678
chr11	71040271	71044717	-	0.00407393	0.00763514	0.0176733	0	0.00407333	IAPLTR2_Mm	679
chr11	73063463	73063866	+	2.15249	1.38671	1.50766	2.03399	0.941574	IAPLTR2a2_Mm	680
chr11	74540176	74545396	+	0.100629	0.0552776	0.0978462	0.0109807	0.0242863	IAPLTR1_Mm	681
chr11	74884410	74891503	+	0.347319	0.442726	0.434843	0.0673459	0.0485153	IAPLTR1a_Mm	682
chr11	75357405	75365045	-	0.00711299	0.00444359	0.00257143	0	0.00711193	RLTR6-int	683
chr11	78733083	78733867	+	0	0	0	0	0	RLTR13C2	684
chr11	79232682	79237105	-	0.0819022	0.092098	0.124356	0.159826	0.143308	IAPLTR2_Mm	685
chr11	79741496	79745879	-	0.0165299	0.0154897	0.0403363	0.00871809	0.0123956	IAPLTR2a2_Mm	686
chr11	85061447	85067868	+	0.0338526	0.0158612	0.00917858	0.0267815	0.00564126	IAPLTR2a	687
chr11	85284449	85285056	-	0.0297973	0	0	0	0	Lx8	688
chr11	85285570	85292680	-	0.0101908	0.0190991	0.0193416	0.00806218	0.0101893	IAPLTR1_Mm	689
chr11	85293800	85294165	-	0	0	0	0	0	IAPLTR2a2_Mm	690
chr11	85439443	85442274	-	0.0127943	0.00599461	0	0	0	IAPLTR2a	691
chr11	86824695	86825023	+	0.71586	0.619212	0.836097	0.464682	0.055058	IAPLTR2b	692
chr11	86845642	86850157	+	0.0320935	0.0451109	0.0261049	0.00423163	0.0280776	IAPLTR1a_Mm	693
chr11	88890878	88893117	-	0	0.0075789	0	0.00853128	0	MuLV-int	694
chr11	88893097	88896269	-	0.00570967	0.0321022	0.00619233	0.0180681	0.0285441	RLTR4_MM-int	695
chr11	88910954	88918245	-	0.00496895	0.0256094	0.048501	0.0131034	0.00496821	IAPLTR1_Mm	696
chr11	88919130	88919435	-	0.236821	0	0.19263	0.249805	0	ERVL-B4-int	697
chr11	89091381	89091938	-	0	0	0	0	0	IAPLTR2a2_Mm	698
chr11	90507633	90510449	+	0.0128625	0	0.00697489	0	0	IAPLTR2a	699
chr11	91921458	91921864	-	0	0	0	0	0	IAPLTR2a	700
chr11	98067376	98067680	+	3.80155	4.56424	3.80081	1.87968	2.19745	RLTR27	701
chr11	98613277	98620376	+	0.0637915	0.0884703	0.0885556	0.0834383	0.0969486	IAPLTR1a_Mm	702
chr11	100662898	100669521	+	0.00820506	0.028192	0.026696	0.00576995	0.00820384	IAPLTR1a_Mm	703
chr11	103580632	103581298	+	0.190131	0.127262	0.206204	0	0	RLTR44-int	704
chr11	104859614	104862329	-	0	0	0	0	0	IAPLTR2b	705
chr11	105993689	105994540	-	0.0212638	0	0	0	0	RLTR13D6	706
chr11	108824413	108826408	-	0	0.00850538	0	0	0	IAPLTR2a2_Mm	707
chr11	108993945	108994288	+	0	0.049351	0	0	0	IAPLTR2b	708
chr11	114607981	114608096	+	0	0	0	0	0	B4	709
chr11	114944220	114944783	+	0	0	0	0	0	IAPLTR2a2_Mm	710
chr11	114974243	114975069	+	0	0	0	0	0	IAPEY2_LTR	711
chr11	115754898	115762001	-	0.0535547	0.0262872	0.0663793	0.0457307	0.0229486	IAPLTR1_Mm	712
chr11	116785593	116792704	+	0.0280209	0.0310317	0.0414404	0.0268702	0.0203758	IAPLTR1_Mm	713
chr11	117499807	117504954	+	0.0175959	0.0230841	0.00763336	0.00742427	0.00351866	IAPLTR1a_Mm	714
chr11	120769094	120770023	+	0.0779216	0.0182546	0.0422544	0.0205485	0	RLTR13B1	715
chr11	121069912	121074906	+	0.0108809	0.0101962	0.00786718	0.00382584	0.0108793	IAPLTR1_Mm	716
chr12	4787764	4790204	+	0	0	0	0	0	IAPLTR2a2_Mm	717
chr12	13344873	13345761	+	0.326061	0.343736	0.442031	0.515907	0.570522	RLTR13B1	718
chr12	13433576	13433992	+	1.04269	0.366404	0.801009	0.687412	0.347512	IAPLTR2a	719
chr12	17243496	17248519	+	0.00721209	0.00675825	0.0195544	0.0228225	0.0216331	IAPLTR2_Mm	720
chr12	17918091	17918997	-	0	0	0.0433259	0.0210695	0	RLTR13B3	721
chr12	17928653	17931157	+	0.13018	0.216868	0.141185	0.43484	0.448333	IAPLTR2b	722
chr12	18033601	18034823	-	0	0.0138812	0.0321313	0.0156256	0.0592448	IAPLTR3-int	723
chr12	18183124	18185753	+	0.247986	0.251746	0.283891	0.079928	0.0413249	IAP-d-int	724
chr12	18555879	18556719	+	0.947846	0.8882	0.981246	0.636245	0.710779	IAP-d-int	725
chr12	18803080	18803901	-	0	0	0	0	0	RLTR13G	726
chr12	18805427	18806979	+	0	0	0.0126518	0	0	MMERVK10C-int	727
chr12	18900501	18903080	+	0.947971	0.736974	0.837717	0.81477	0.814432	IAP-d-int	728
chr12	19019616	19020441	-	0	0	0	0	0	RLTR13G	729
chr12	19130125	19130943	-	0	0	0	0	0	RLTR13G	730
chr12	19814151	19818170	-	0.234346	0.190038	0.234606	0.19015	0.15771	IAPLTR2a	731
chr12	19999086	19999926	+	1.89569	1.79659	2.35966	1.49972	1.48617	IAP-d-int	732
chr12	20099587	20107571	-	0.0090754	0.0106304	0.00738194	0.00478649	0.0136111	IAPEY3-int	733
chr12	20643464	20645505	-	0	0.0249413	0.0192441	0	0	IAPLTR2_Mm	734
chr12	20795321	20797951	+	0	0	0	0.0217903	0	IAP-d-int	735
chr12	20953659	20955180	-	0.0833229	0.0223085	0.116186	0.138115	0.095212	ERVB4_2-I_MM-int	736
chr12	20996467	20998385	-	0.0472037	0.0176933	0	0.00995834	0.00943934	RLTR10-int	737
chr12	21037473	21040101	+	0.12404	0.142065	0.186842	0.312565	0.234264	IAP-d-int	738
chr12	21604177	21606985	+	0.0257982	0.00604369	0.027979	0.00680316	0	IAPLTR2a	739
chr12	21630847	21633478	-	0.0344164	0.00645013	0.00746515	0	0.00688225	IAP-d-int	740
chr12	22042020	22049077	+	0.00256684	0.00240532	0	0.00812272	0.00256646	IAPLTR2b	741
chr12	22099370	22101950	-	0.231636	0.171017	0.167479	0.185103	0.140365	IAP-d-int	742
chr12	22152198	22154113	+	0.018911	0.0531631	0.0205097	0.0199479	0.0472706	RLTR45-int	743
chr12	22417748	22420327	-	0.575804	0.394808	0.472168	0.562932	0.575719	IAP-d-int	744
chr12	22796635	22797456	+	0	0	0	0	0	RLTR13G	745
chr12	22963606	22964446	-	1.91723	2.03882	2.21948	2.11324	1.91695	IAP-d-int	746
chr12	23051850	23059519	+	0.00708609	0.00885358	0.0153702	0.00498307	0.00944672	RLTR6-int	747
chr12	23258370	23260950	-	0.252694	0.295991	0.319732	0.21472	0.196511	IAP-d-int	748
chr12	23576781	23579360	-	0.49154	0.315846	0.357934	0.422199	0.428279	IAP-d-int	749
chr12	24019772	24022431	-	0.456325	0.306347	0.384102	0.308922	0.442637	IAP-d-int	750
chr12	24142613	24143434	+	0	0	0	0	0	RLTR13G	751
chr12	24311152	24311995	-	0.150258	0.100573	0.0465599	0.0679268	0.0858487	IAP-d-int	752
chr12	28733430	28733938	+	0.0711858	0.0333531	0	0.0750887	0.0355876	RLTR13B1	753
chr12	28843464	28843831	-	0	0	0.0533921	0	0	IAPLTR2a2_Mm	754
chr12	33747266	33750014	+	0	0	0	0	0	IAPLTR2b	755
chr12	36615970	36618592	+	0.0414413	0.0647226	0.0224723	0.0728557	0.0483411	IAPLTR2a2_Mm	756
chr12	40181496	40184321	+	0	0	0	0	0	IAPLTR2a2_Mm	757
chr12	40288304	40288647	-	0	0	0	0	0	MTE2a	758
chr12	40402091	40409201	+	0.0254771	0.0238739	0.0193416	0.0161244	0.015284	IAPLTR1a_Mm	759
chr12	43216194	43216615	-	0	0.120688	0.0465599	0.0452845	0.0429244	IAPLTR2_Mm	760
chr12	50461478	50464026	+	0	0	0	0	0	IAPEY2_LTR	761
chr12	51293001	51293368	-	0	0	0	0	0	IAPEY_LTR	762
chr12	52172670	52176649	-	0.00455195	0	0.00493675	0	0	IAPLTR2_Mm	763
chr12	54358507	54361508	+	0	0.00565514	0.00654506	0	0.00603401	IAPLTR1a_Mm	764
chr12	54362134	54362204	-	0	0	0	0	0	L2a	765
chr12	54599211	54600148	+	0	0	0	0	0	RLTR13B3	766
chr12	54870933	54872195	-	0	0.0268832	0.0155568	0	0	IAPLTR2a2_Mm	767
chr12	65027185	65034307	-	0.0127171	0.0214503	0.0165506	0.0187801	0.00762913	IAPLTR1a_Mm	768
chr12	65784470	65787291	-	0	0	0.00696254	0	0.00641888	IAPLTR2a2_Mm	769
chr12	67822999	67823383	+	0	0	0	0	0	IAPEY_LTR	770
chr12	69163776	69164565	-	0.0229326	0	0	0.02419	0	RLTR13C2	771
chr12	69716617	69719618	+	0	0	0	0	0.012068	MMERVK10D3_I-int	772
chr12	72638513	72642528	+	0.00451115	0	0	0	0	IAPLTR2b	773
chr12	74097933	74098030	+	0	0	0	0	0	RLTR13F	774
chr12	76653031	76655952	+	0	0	0	0.00654006	0	IAPLTR2_Mm	775
chr12	79114305	79116640	+	0	0.00726744	0	0.00818068	0	IAPLTR2a2_Mm	776
chr12	80417262	80424412	+	0.0405354	0.0261144	0.0412144	0.0267236	0.0379963	IAPLTR1_Mm	777
chr12	81432822	81433179	+	0	0	0	0	0	IAPEY2_LTR	778
chr12	84003026	84003437	-	0.175891	0.206028	0.14307	0.185535	0.131899	IAPLTR2a	779
chr12	88091962	88098267	+	0	0	0	0	0	RLTR6-int	780
chr12	91227544	91230099	+	0	0	0	0	0	IAPLTR2a	781
chr12	103750966	103752374	-	0	0	0	0	0	IAPLTR2b	782
chr12	104306818	104308837	-	0	0	0	0	0	IAPEY2_LTR	783
chr12	105628057	105630707	+	0.00683394	0.0064039	0	0.00720862	0	IAPLTR2a	784
chr12	108724951	108728607	+	0.029724	0.0139268	0	0.0104512	0.00495326	MERV1_I-int	785
chr12	109820508	109823198	-	0	0	0	0.00710147	0	IAPLTR2_Mm	786
chr12	112887287	112890216	+	0.0061832	0	0	0	0.00618228	IAPLTR2a2_Mm	787
chr12	114940986	114943949	+	0	0.00572764	0	0	0	IAPLTR2a2_Mm	788
chr12	115971880	115972367	-	0	0	0	0	0	IAPLTR2_Mm	789
chr12	118794152	118797316	+	0	0	0	0	0	IAPLTR2a2_Mm	790
chr12	119774989	119775610	+	0.0582533	0.109175	0.221122	0.43013	0.49508	RLTR10-int	791
chr13	3015587	3018347	-	0.00656167	0	0.00711636	0	0.0131214	IAPLTR2a2_Mm	792
chr13	3348390	3351970	+	0	0	0	0.00533652	0	IAPLTR2b	793
chr13	3614960	3618908	+	0.0367015	0.038691	0.00995101	0.00483922	0.018348	IAPLTR2a2_Mm	794
chr13	7631255	7631626	-	0	0	0	0	0	IAPLTR2a	795
chr13	8021910	8024587	-	0	0.0316967	0.0220108	0.0214078	0.00676404	IAPLTR2a2_Mm	796
chr13	9804882	9805212	-	0	0	0	0	0	IAPEY2_LTR	797
chr13	11126970	11129698	+	0	0	0	0	0	IAPLTR2a2_Mm	798
chr13	12684734	12685134	-	0	0	0	0	0	RLTR44B	799
chr13	12859557	12863653	+	0.0176878	0.0124311	0.0191831	0.0046644	0.0044213	IAPLTR2_Mm	800
chr13	13539900	13541008	+	0	0	0	0	0	IAP-d-int	801
chr13	13894075	13894855	+	0	0	0	0	0	RLTR13D3A	802
chr13	19115005	19115354	+	0.621147	0.921594	0.617517	0.1092	0.414036	IAPLTR1a_Mm	803
chr13	19159063	19159317	-	0	0	0	0	0	B4	804
chr13	19571372	19571525	+	0	0	0	0	0	RLTR13G	805
chr13	23638966	23646133	-	0.0202196	0.0260525	0.0301522	0.0346583	0.00252708	IAPLTR1a_Mm	806
chr13	28198477	28201352	-	0	0	0	0.00664467	0	IAPLTR2a2_Mm	807
chr13	33052561	33053472	+	0	0	0	0	0	RLTR13F	808
chr13	34166773	34174004	-	0.0275559	0.00469489	0.0108674	0.00792729	0.0150283	IAPLTR1_Mm	809
chr13	38109642	38115021	+	0.0370417	0.0252442	0.0401731	0.0461767	0.101008	IAPLTR1_Mm	810
chr13	46773022	46773417	+	0	0	0	0	0	MTA_Mm	811
chr13	49745329	49748865	-	0.0204883	0.00479976	0	0	0.00512131	IAPEY2_LTR	812
chr13	50501498	50505351	-	0.00470077	0.00440496	0.0152945	0	0	IAPLTR2_Mm	813
chr13	51085724	51086328	+	0	0	0	0	0	RLTR17	814
chr13	51097080	51097414	+	0	0	0	0	0	IAPLTR2b	815
chr13	51098507	51098640	+	0	0	0	0	0	ID_B1	816
chr13	52382093	52389184	-	0.0255454	0.0191503	0.0221639	0.0296405	0.033204	IAPLTR1a_Mm	817
chr13	53872855	53873228	-	0	0	0	0	0	IAPEY_LTR	818
chr13	56712880	56719977	-	0.0816761	0.0980623	0.0913487	0.051154	0.079112	IAPLTR1_Mm	819
chr13	56965771	56971188	+	0	0.00313339	0.00362648	0	0	IAP1-MM_I-int	820
chr13	60484474	60484761	+	0	0	0	0	0	B4A	821
chr13	61102436	61106118	+	0	0	0.00533486	0	0.0049183	ETnERV-int	822
chr13	61941157	61944275	+	0.203298	0.0707591	0.144889	0.0367619	0	IAPLTR3-int	823
chr13	61951239	61957608	+	0.0284408	0.0639626	0.055521	0.0300001	0.0540295	ETnERV-int	824
chr13	62374464	62374606	-	9.88188	12.3467	10.7172	8.82003	5.95358	B1_Mus1	825
chr13	62457922	62458062	-	7.19532	8.54857	5.15593	8.53854	8.6074	B1_Mus1	826
chr13	62535974	62536376	-	0.899096	0.294881	0.731325	0.900971	0.539377	IAPLTR2_Mm	827
chr13	62548546	62551107	+	0.0282854	0.0132527	0.00766912	0	0	IAPLTR2a2_Mm	828
chr13	62659297	62664445	-	0.137222	0.131884	0.183165	0.0668054	0.0281439	IAPLTR2_Mm	829
chr13	62814959	62815341	+	0.0473023	0.0886514	0.256505	0.0498957	0	IAPLTR2a	830
chr13	63218000	63223147	-	0.105576	0.122016	0.141217	0.0222728	0.0774106	IAPLTR1_Mm	831
chr13	65518741	65521406	+	0.550435	0.573108	0.596966	0.322563	0.251396	IAPLTR2b	832
chr13	66229221	66236324	+	0.00510044	0.0119487	0.0110632	0.00807013	0.0280483	IAPLTR1a_Mm	833
chr13	67626948	67627330	+	0.189209	0.177303	0	0	0	IAPLTR2a	834
chr13	68153211	68155213	+	0	0	0	0	0	IAPEY2_LTR	835
chr13	68470303	68472323	-	0	0	0	0	0	IAPEY2_LTR	836
chr13	76032643	76036705	+	0	0.00417837	0.00967181	0	0	IAPLTR2b	837
chr13	79355405	79356258	-	0	0	0	0	0	RLTR13B4	838
chr13	81024103	81025626	+	0	0	0	0	0	IAPEY2_LTR	839
chr13	81810849	81811174	-	0	0	0	0.0586198	0	IAPEY2_LTR	840
chr13	82111003	82113840	+	0	0	0	0	0	IAPLTR2a2_Mm	841
chr13	84420886	84423735	-	0.0190703	0.0178702	0.0275765	0.0201159	0.0190675	IAPLTR2a2_Mm	842
chr13	85404110	85407763	-	0.00495807	0	0	0	0.00495733	IAPLTR2a	843
chr13	87396428	87398998	-	0.00704659	0.00660316	0	0	0.00704554	IAPEY_LTR	844
chr13	88160281	88162334	-	0	0.00826521	0.00956586	0	0.00881893	IAPLTR2b	845
chr13	90108559	90109224	-	0	0	0	0	0	RLTR13G	846
chr13	93198613	93202748	+	0.0219013	0.0205231	0.0285033	0.0184817	0.0350369	IAPEY_LTR	847
chr13	99002209	99002530	+	0.562633	0.421782	0.244078	0	0.11251	IAPLTR2b	848
chr13	99127207	99127659	-	0	0	0	0	0	IAPLTR2_Mm	849
chr13	99130829	99137951	-	0.00508684	0.00715011	0.00827528	0.0107315	0.00508608	IAPLTR1a_Mm	850
chr13	103946997	103949836	-	0	0	0	0.0067289	0	IAPLTR2_Mm	851
chr13	104676097	104679647	+	0.137751	0.119521	0.154929	0.0430528	0.0918202	IAPEY2_LTR	852
chr13	106785333	106788290	+	0.00612467	0	0	0	0	IAPLTR2_Mm	853
chr13	108456154	108458932	-	0	0	0.00707027	0	0.0065182	IAPLTR2a2_Mm	854
chr13	111499654	111506634	+	0.0155709	0.031614	0.0337744	0.0218995	0.0129738	IAPLTR1_Mm	855
chr13	111694234	111700822	-	0.0412432	0.0515305	0.0536757	0.0348036	0.0164948	IAPLTR1_Mm	856
chr13	115972292	115972675	-	0	0	0	0	0	Lx2	857
chr13	117440969	117445494	-	0	0	0	0	0	IAP1-MM_I-int	858
chr13	118070516	118074355	+	0.00471791	0	0.00511674	0	0	IAPLTR2a	859
chr13	118151559	118151952	-	0	0	0	0	0	IAPLTR2a2_Mm	860
chr14	8287182	8287519	-	0	0	0	0	0	RLTRETN_Mm	861
chr14	11466597	11469654	-	0.0118488	0	0	0.0374952	0	IAPEY2_LTR	862
chr14	13010455	13010779	+	0	0	0	0	0	IAPEY_LTR	863
chr14	14046944	14048621	-	0	0	0	0	0	IAPLTR2b	864
chr14	15019267	15022862	+	0	0.00472101	0	0	0	IAP1-MM_I-int	865
chr14	16068213	16072682	+	0.00405297	0	0	0	0	IAPEY_LTR	866
chr14	18146824	18147123	+	0	0	0	0	0	RLTR13A	867
chr14	18254367	18256027	+	0.174514	0.0613247	0.14195	0.0230103	0.119961	ETnERV-int	868
chr14	19271749	19272628	+	0	0	0	0	0	RLTR10-int	869
chr14	19628345	19636542	+	0	0	0	0	0	IAPLTR3-int	870
chr14	26325619	26325763	-	0	0	0	0	0	RLTR13A1	871
chr14	26325763	26326122	-	0	0	0	0	0	IAPEY2_LTR	872
chr14	26815744	26816011	-	0	0	0	0	0	B4A	873
chr14	33647838	33650789	+	0	0.00575093	0	0	0	IAPLTR2a2_Mm	874
chr14	43992626	43996234	-	0	0	0	0	0	IAP1-MM_I-int	875
chr14	44668806	44677109	+	0.00436339	0.0020444	0	0	0.00218137	IAPEY_LTR	876
chr14	49808017	49811886	+	0	0	0	0	0	IAPEY_LTR	877
chr14	49811891	49812218	-	0	0	0	0	0	IAPEY_LTR	878
chr14	50202280	50208643	-	0.0996366	0.146719	0.108059	0.0660624	0.119546	ETnERV-int	879
chr14	53111438	53114354	+	0	0.00581993	0	0	0	IAPLTR2_Mm	880
chr14	54314618	54318785	-	0.0434664	0.0407311	0.0707112	0.0458495	0.0391139	IAPEY_LTR	881
chr14	66613476	66617050	+	0	0	0	0	0	IAPLTR2_Mm	882
chr14	71801073	71804007	+	0	0	0	0.00651109	0.00617175	IAPLTR2a	883
chr14	73528646	73529440	-	0	0	0	0	0	RLTR13C2	884
chr14	75425322	75431293	+	0.0151681	0.0341127	0.0329007	0.0287995	0.0454975	IAPLTR1a_Mm	885
chr14	85002596	85005294	-	0	0.00629001	0	0	0	IAPLTR2a2_Mm	886
chr14	86398117	86398596	+	0	0	0	0.159251	0.0754754	IAPLTR2_Mm	887
chr14	89037667	89040266	-	0	0	0	0	0	IAPLTR2a2_Mm	888
chr14	91469676	91470129	-	0	0.0373937	0.0865563	0	0	IAPLTR2a2_Mm	889
chr14	92040550	92041048	-	0	0	0	0	0	IAPLTR2a2_Mm	890
chr14	98754920	98757619	-	0	0	0.00727714	0	0	IAPLTR2a	891
chr14	101009896	101012810	+	0	0	0	0	0	IAPEY2_LTR	892
chr14	101581160	101584207	+	0	0.00556979	0	0	0	IAPLTR2_Mm	893
chr14	105207637	105214265	-	0.0245966	0.0153659	0.00889196	0.0172968	0.0191279	IAPLTR1a_Mm	894
chr14	106350361	106353230	+	0.00631247	0.023661	0.0205383	0	0.0189346	IAPLTR2a2_Mm	895
chr14	106453798	106454151	+	0	0	0	0	0	MMVL30-int	896
chr14	107484474	107484925	+	0	0	0	0	0	IAPLTR2a2_Mm	897
chr14	113405040	113405374	-	0	0	0	0	0	IAPLTR2b	898
chr14	113678107	113681088	+	0	0	0	0	0	IAPLTR2a2_Mm	899
chr14	118778527	118779392	+	0	0	0	0	0	RLTR13B1	900
chr14	119441482	119445257	-	0	0.00899191	0.0156104	0	0.00479716	IAPLTR2_Mm	901
chr14	120457523	120457834	-	0	0	0	0	0	IAPLTR2b	902
chr14	121388864	121389377	+	0.0704933	0	0	0	0	IAPLTR2_Mm	903
chr14	123631879	123632215	+	0.053759	0	0	0	0	IAPLTR1a_Mm	904
chr15	5882263	5886978	-	0.0729896	0.0359982	0.0166652	0.0405218	0.0576148	ETnERV-int	905
chr15	8548038	8553018	-	0.0218231	0.0068166	0.0118339	0.00383659	0.00727327	IAPLTR2_Mm	906
chr15	9329984	9333098	+	0	0	0	0	0	IAPEY2_LTR	907
chr15	9499163	9502955	+	0.038211	0.0134274	0.0155404	0.0151147	0.042981	IAPLTR2a	908
chr15	16611975	16614819	+	0	0	0	0	0	IAPLTR2a2_Mm	909
chr15	19286419	19287320	-	0	0	0	0.0211863	0	IAP-d-int	910
chr15	19378363	19378681	-	0	0.0532186	0.123187	0.119812	0.170352	IAPLTR2b	911
chr15	22055027	22055783	-	0	0	0	0	0	IAPLTR2a2_Mm	912
chr15	23958349	23961748	+	0	0	0	0	0	IAPLTR2a	913
chr15	25526808	25527167	-	0	0	0	0	0	IAPLTR2a	914
chr15	27514830	27515157	-	0	0	0	0	0	IAPEY_LTR	915
chr15	29131254	29133920	-	0	0.00636548	0	0	0	IAPLTR2a2_Mm	916
chr15	31354607	31355229	-	0.436198	0.35425	0.34692	0.306743	1.04672	IAPLTR2_Mm	917
chr15	34225272	34232170	-	0.015756	0.00984301	0.0170879	0.00553995	0.0210049	IAPEY2_LTR	918
chr15	34552366	34552692	-	0	0	0	0	0	IAPLTR2b	919
chr15	35184671	35185470	-	0.022646	0.0212209	0.0245603	0	0.0452852	RLTR13C2	920
chr15	36995565	36997358	-	0.979558	0.984158	0.909034	1.43805	1.17126	IAPLTR1_Mm	921
chr15	37849569	37850050	+	0	0	0	0	0	RLTR13B1	922
chr15	37877680	37881505	+	0	0.0044372	0.00513546	0	0.00946894	IAPLTR2b	923
chr15	38462425	38465006	-	0.0350828	0.0263001	0.053268	0.0370063	0	IAPLTR2a2_Mm	924
chr15	38478792	38483174	+	0.0248005	0.00774663	0.0224142	0.0174402	0.0454609	IAPLTR1a_Mm	925
chr15	38610186	38617172	+	0.0181505	0.0145786	0	0.00273509	0.00518508	IAPLTR2b	926
chr15	38622184	38622376	-	0	0.175925	0	0	0	L1MA6	927
chr15	38622376	38622841	-	0.0388772	0.182154	0.0421637	0.0410087	0	IAPLTR2a2_Mm	928
chr15	40093784	40093999	-	0	0	0	0	0	MLT1B	929
chr15	45907403	45907818	+	0.0435499	0	0	0	0.0435435	IAPLTR2a2_Mm	930
chr15	46706312	46711838	+	0	0.0092148	0.00355496	0.00345758	0	IAPLTR2b	931
chr15	46888413	46893983	+	0.0292678	0.0121894	0.0105807	0.0171514	0.0357665	L1Md_A	932
chr15	50625173	50632375	+	0.0100607	0.00707069	0.0218223	0	0.0100592	IAPLTR1a_Mm	933
chr15	52081949	52084800	+	0	0	0	0	0	IAPLTR2_Mm	934
chr15	58314075	58314331	+	0	0	0	0	0	IAPEY2_LTR	935
chr15	59161656	59161795	+	0	0	0.421034	0	0.258773	ORR1E	936
chr15	59161805	59167246	-	0.00332907	0.00311958	0	0	0	IAPLTR1a_Mm	937
chr15	66045209	66050129	+	0	0	0	0	0.00736195	IAPLTR2a2_Mm	938
chr15	75225356	75226140	-	0	0	0	0	0	RLTR13C2	939
chr15	77569458	77571991	+	0	0.0133992	0	0	0	IAPLTR2a2_Mm	940
chr15	82470467	82476159	+	0.0127292	0.00596407	0	0.00671353	0	L1Md_F2	941
chr15	86312263	86317593	-	0.0373822	0.00636906	0.0184283	0.0215082	0.00679576	IAPLTR1_Mm	942
chr15	89338152	89338581	+	0	0.0789616	0	0	0	IAPLTR2_Mm	943
chr15	91419483	91422202	+	0.00666058	0	0	0	0	IAPLTR2a2_Mm	944
chr15	96228682	96229119	+	0.0413625	0.116279	0	0.0436303	0	IAPLTR2_Mm	945
chr15	96229238	96229602	+	0	0	0	0	0	RMER19B	946
chr15	97734032	97736710	+	0.0338126	0.00633697	0.00733418	0.00713328	0	IAPLTR2a	947
chr15	100542521	100545705	+	0	0	0.006169	0.00600002	0	IAPEY2_LTR	948
chr16	10186734	10187771	+	0	0	0.0567869	0.0368209	0	RLTR44A	949
chr16	10187409	10187771	+	0	0	0.162382	0.10529	0	RLTR44A	950
chr16	11391305	11391749	-	0	0	0	0	0	IAPLTR2_Mm	951
chr16	13481593	13484480	-	0	0	0.0272137	0.00661706	0.0125444	IAPLTR2_Mm	952
chr16	13929997	13930474	+	8.30036	8.73698	7.85109	6.75649	5.94961	IAPLTR2_Mm	953
chr16	14113588	14113990	+	1.3936	1.09527	0.975101	0.237098	0.134844	IAPLTR2a	954
chr16	15528238	15528543	+	0	0	0	0	0	IAPLTR2b	955
chr16	16025262	16027323	-	0.395371	0.197595	0.428794	0.296567	0.456805	IAPLTR1a_Mm	956
chr16	16373582	16373961	-	0	0	0	0	0	RLTR44A	957
chr16	17992152	17995727	+	0.0253311	0.00474741	0	0	0	IAPLTR2b	958
chr16	19647960	19652463	-	0.0201119	0.0188463	0.0130872	0.00424291	0.00804356	IAPEY_LTR	959
chr16	20860509	20861394	-	0	0	0	0	0	RLTR13D6	960
chr16	21104920	21109241	+	0	0	0	0	0	IAPLTR2b	961
chr16	21658296	21658764	+	0.309028	0.217186	0.460834	0.162986	0	IAPLTR2_Mm	962
chr16	21658764	21659094	+	0.328401	0.205157	0.296802	0.0577343	0	L1_Mus1	963
chr16	21683644	21684190	+	0.0331202	0.0931082	0	0.0698723	0.132461	IAPLTR2a2_Mm	964
chr16	22033380	22035947	-	0.00705482	0.0330544	0.038256	0.0223248	0.091699	IAPLTR2a2_Mm	965
chr16	22037505	22037828	-	0	0.0523973	0.0606428	0	0	MTD	966
chr16	22277245	22281695	+	0	0.00381414	0	0	0	IAPEY2_LTR	967
chr16	22980045	22983083	+	0	0.0111726	0.00646538	0	0	IAPLTR1a_Mm	968
chr16	25573959	25574275	-	0	0	0	0	0	IAPLTR2b	969
chr16	30907674	30913080	-	0.10722	0.122451	0.134453	0.127235	0.184256	ETnERV-int	970
chr16	31440844	31441246	+	0.674322	0.210629	0.68257	0.142259	0.0449481	IAPLTR2a	971
chr16	32195537	32200340	+	0.0113136	0.0494742	0.0408998	0.0079559	0.0339356	IAPLTR1_Mm	972
chr16	33847237	33852588	-	0.0236953	0.00317204	0.0073424	0.0214238	0.0203073	IAPLTR1_Mm	973
chr16	34018739	34025903	+	0.0252851	0.0568655	0.0274226	0.0266714	0.0278095	IAPLTR1_Mm	974
chr16	37522262	37522399	+	0	0	0	0	0	B1_Mus2	975
chr16	39583064	39583546	-	0	0	0.0406797	0	0	IAPLTR2a2_Mm	976
chr16	48101233	48103504	+	0	0	0	0	0	IAPLTR2a2_Mm	977
chr16	48153919	48154887	+	0	0.0175198	0	0	0	RLTR13B1	978
chr16	48155278	48155776	-	0	0	0	0	0	MTC	979
chr16	49178346	49181152	-	0	0	0	0	0	IAPLTR2a2_Mm	980
chr16	52663975	52667011	+	0.00596535	0.00558997	0	0.00629241	0	IAPLTR2a2_Mm	981
chr16	52667013	52667487	-	0	0	0	0	0	IAPLTR2a2_Mm	982
chr16	54135230	54139924	+	0	0	0	0	0	MMERVK10C-int	983
chr16	56196024	56196808	+	0	0	0	0.0486881	0.0230753	RLTR13F	984
chr16	60932839	60934499	-	0.07635	0.0919871	0.130121	0.0920412	0.0763387	L1Md_Gf	985
chr16	62378497	62381194	-	0	0	0	0	0	IAPLTR2b	986
chr16	62875915	62880238	+	0.138264	0.200234	0.163584	0.128166	0.10473	IAPLTR1a_Mm	987
chr16	62880336	62880935	-	0	0	0	0	0.0301901	IAPLTR2a2_Mm	988
chr16	69864918	69869082	-	0	0	0.00471747	0	0	IAPEY_LTR	989
chr16	73141287	73141863	-	0	0	0	0	0	IAPLTR2a2_Mm	990
chr16	74104484	74104928	+	0	0	0	0	0.0407058	RLTR44C	991
chr16	81015613	81019772	-	0.00435499	0.00816189	0.00472314	0.00459377	0.00435435	IAPEY_LTR	992
chr16	82677667	82677976	+	0	0	0	0	0	RLTR44B	993
chr16	83337816	83340738	-	0.012396	0.0348479	0.00672196	0.00653783	0	IAPLTR2a2_Mm	994
chr16	84577153	84577756	-	0	0	0	0	0	IAPLTR2a2_Mm	995
chr16	89996550	89999279	+	0	0.00621858	0.00719717	0	0.0066352	IAPLTR2a2_Mm	996
chr16	90675188	90675584	-	0	0	0	0	0	IAPLTR2a	997
chr16	94274905	94281959	+	0.0102717	0.00721902	0.0278501	0.00812618	0.0128378	IAPLTR1a_Mm	998
chr16	98089461	98095855	+	0.121817	0.0796407	0.0645213	0.131484	0.0651484	IAP-d-int	999
chr17	11097850	11105010	-	0.0177095	0.0284487	0.0274379	0.0133432	0.0227659	IAPLTR1_Mm	1000
chr17	12068625	12076050	+	0.00243964	0	0.00264588	0	0	MMERVK10C-int	1001
chr17	12250692	12251204	+	0	0.033093	0	0	0	RLTR44-int	1002
chr17	12252115	12252499	+	0	0	0	0	0.0470496	RLTR44A	1003
chr17	12283694	12288179	+	0.0121155	0.00378438	0	0.00425993	0	IAPLTR2_Mm	1004
chr17	16872535	16876079	+	0.00511051	0	0	0	0	IAPEY2_LTR	1005
chr17	17472790	17478805	+	0.0180686	0.0479728	0.01633	0.0349419	0.0120439	IAPLTR1_Mm	1006
chr17	18119809	18122250	+	0	0	0	0	0	IAPLTR2_Mm	1007
chr17	19635970	19642120	-	0	0	0	0	0	MMERVK10D3_I-int	1008
chr17	22405935	22406821	+	0.0204248	0	0.0221514	0	0	RLTR13B1	1009
chr17	22692259	22692627	+	0.49097	0.276044	0.425979	0.310733	0.245448	IAPEY_LTR	1010
chr17	27350972	27355047	-	0	0	0	0.00937687	0.00888817	IAPLTR2_Mm	1011
chr17	28677047	28677158	-	0	0	0	0	0	RSINE1	1012
chr17	28857598	28857769	+	0	0	0	0	0	MTD	1013
chr17	28937407	28940182	+	0.24147	0.250737	0.205259	0.0275361	0.0326262	IAPLTR2a2_Mm	1014
chr17	31552408	31554076	+	0.0434195	0.0406872	0	0.0229	0.0217065	IAPLTR2_Mm	1015
chr17	33044512	33052285	+	0	0	0.00252743	0.0024582	0	RLTR6-int	1016
chr17	33618276	33625381	-	0.0433416	0.0286688	0.0414754	0.0161357	0.0356878	IAPLTR1a_Mm	1017
chr17	34781701	34782804	-	0	0	0	0	0	IAP-d-int	1018
chr17	35363427	35367349	-	0	0	0	0	0	IAP-d-int	1019
chr17	36007143	36014240	+	0.913751	1.14565	0.960545	1.13616	1.59755	IAPLTR1a_Mm	1020
chr17	36022363	36022702	-	0.0532846	0	0	0	0	RLTR13C2	1021
chr17	38047170	38047836	+	0.0543232	0.0763571	0.0589154	0.0286508	0.0543151	IAPLTR2a2_Mm	1022
chr17	38443136	38443945	-	0	0	0	0	0	RLTR13C2	1023
chr17	40518149	40519038	+	0	0	0	0	0	RLTR13B1	1024
chr17	40666532	40669144	-	0.00693332	0	0.0150389	0	0	RLTR45-int	1025
chr17	50074462	50078819	-	0.444813	0.237628	0.396753	0.0657758	0.137165	IAPLTR1_Mm	1026
chr17	54504063	54506963	-	0	0	0	0	0.00624408	IAPLTR2a2_Mm	1027
chr17	55923573	55926480	+	0.0186899	0	0	0.00657155	0.0186872	L1Md_F	1028
chr17	60547191	60550066	+	0	0	0.00683181	0.00664467	0	IAPLTR2a2_Mm	1029
chr17	61474855	61480777	+	0	0	0	0	0	MMERGLN-int	1030
chr17	72136314	72136722	+	0	0	0	0	0	IAPLTR2a	1031
chr17	72136722	72136899	+	0	0	0	0	0	RMER13B	1032
chr17	73127527	73128384	-	0	0	0	0	0	RLTR13B1	1033
chr17	75554979	75555324	-	0	0	0	0	0	ERVB7_1-LTR_MM	1034
chr17	75555550	75555961	-	0	0	0	0	0	IAPLTR2a2_Mm	1035
chr17	75559928	75560262	-	0	0	0	0	0	IAPEY_LTR	1036
chr17	76041098	76045540	-	0.126406	0.164303	0.128247	0.120433	0.236466	ETnERV-int	1037
chr17	80564982	80567813	+	0.198312	0.107903	0.201201	0.0472353	0.0511697	MMERVK10D3_I-int	1038
chr17	82431587	82431920	+	0	0	0	0	0	IAPEY2_LTR	1039
chr17	83256068	83260397	+	0	0.00392072	0.00453771	0.00441341	0	IAPLTR1a_Mm	1040
chr17	84882927	84887824	+	0.0480845	0.0207963	0.0521494	0.019508	0.0295861	IAPLTR1_Mm	1041
chr17	84898070	84898737	+	0	0	0	0	0	RMER19B	1042
chr17	87579810	87580164	-	0.0510332	0	0	0	0	IAPEY2_LTR	1043
chr17	87599236	87599627	+	0.693244	0.563004	0.350862	0.243751	0.231047	IAPLTR2a	1044
chr17	87749048	87753996	+	0.0292856	0.010291	0.0198508	0.0077228	0.0146406	IAPLTR1_Mm	1045
chr17	88451842	88457050	+	3.40494	3.63065	3.39856	2.96061	3.23056	L1Md_F2	1046
chr17	91830002	91837078	-	0.0102398	0.0119943	0.0111054	0.0216024	0.0255957	IAPLTR1a_Mm	1047
chr17	94691364	94691744	-	0.0475506	0	0	0.100315	0.0475435	IAPEY_LTR	1048
chr18	3698016	3699051	-	0	0	0	0	0	IAP1-MM_I-int	1049
chr18	5109642	5113531	-	0.00465727	0.0043642	0	0.00491261	0.00465658	IAPLTR2_Mm	1050
chr18	6773533	6774581	+	1.0535	1.24615	1.12383	1.54848	1.32963	RLTR13E	1051
chr18	7318610	7326938	+	0.00652543	0.00203827	0.00943608	0	0.00434964	IAPEY_LTR	1052
chr18	7714332	7720705	+	0.00568459	0.0133172	0.0154128	0.00299813	0.0198931	ETnERV-int	1053
chr18	7725175	7725921	+	0.0485054	0	0	0.0255824	0.0484982	RLTR10-int	1054
chr18	7965022	7971404	-	0.0170297	0.0132984	0.00923466	0.0089817	0.0170272	ETnERV-int	1055
chr18	8193852	8194727	+	0	0	0	0	0	RLTR13D6	1056
chr18	9590050	9592386	-	0	0	0	0	0	MMERVK9C_I-int	1057
chr18	18042587	18046279	+	0	0	0	0	0	RLTR44-int	1058
chr18	21261770	21268885	+	0.0101837	0.00477143	0.00552228	0.0134275	0.00763663	IAPLTR1_Mm	1059
chr18	21426283	21426763	+	0.0753296	0.105884	0	0	0	IAPLTR2_Mm	1060
chr18	24033100	24036935	-	0.0141685	0.00442563	0.0204883	0.00996354	0.0141664	IAPLTR2_Mm	1061
chr18	24482344	24484611	+	0.015976	0.044912	0.0173265	0.0252779	0.0239604	IAPLTR2b	1062
chr18	27301502	27304281	-	0	0	0	0	0	IAPLTR2a2_Mm	1063
chr18	31616126	31618696	-	0	0	0	0.00743293	0	IAPLTR2a2_Mm	1064
chr18	34083683	34087805	-	0.0263645	0.00411757	0.0190621	0.00463499	0.0131803	IAPLTR1a_Mm	1065
chr18	35527510	35528591	-	0.251157	0.156901	0.290548	0.0353236	0.0502239	RLTR1B-int	1066
chr18	36473982	36481100	-	0.117063	0.100158	0.0965992	0.064425	0.0636118	IAPLTR1_Mm	1067
chr18	36828443	36832760	-	0	0	0	0	0	IAPEY2_LTR	1068
chr18	36836522	36839472	-	0	0	0	0	0	IAPEY2_LTR	1069
chr18	38960461	38961114	-	0.0277015	0	0.0300432	0.0584406	0.11079	RLTR16B_MM	1070
chr18	42183112	42183449	+	0	0	0	0	0	IAPLTR1a_Mm	1071
chr18	43504870	43505263	-	0	0	0	0	0	IAPLTR2_Mm	1072
chr18	44906500	44909310	-	0	0	0.0209693	0	0.006444	IAPLTR2a2_Mm	1073
chr18	46329371	46329655	+	0	0	0	0	0	IAPLTR2b	1074
chr18	46590036	46590435	+	1.6758	2.03721	1.37538	0.286651	0.181141	IAPLTR2a	1075
chr18	51401636	51405506	-	0	0	0	0.00987345	0	IAPLTR2b	1076
chr18	55320669	55321112	-	0.0408035	0	0.0442529	0	0	IAPLTR1a_Mm	1077
chr18	60528367	60533722	-	0.0101476	0.0253573	0.0146738	0.0178399	0.0101461	IAPLTR1_Mm	1078
chr18	62273762	62277413	-	0.00496078	0.00464861	0.0107603	0	0.00496005	IAPLTR1a_Mm	1079
chr18	67074886	67081478	-	0.0192352	0.0231747	0.017881	0	0	IAPLTR3-int	1080
chr18	73894785	73895151	-	0	0	0	0	0	IAPEY_LTR	1081
chr18	73959218	73959588	+	0	0	0	0	0	IAPEY2_LTR	1082
chr18	74360576	74365115	+	0	0.00747874	0.00432781	0.00841853	0.00398989	IAPEY_LTR	1083
chr18	74365115	74365488	+	0	0	0.0525355	0	0	MuRRS4-int	1084
chr18	74387877	74388769	-	0	0	0	0	0	RLTR13B1	1085
chr18	82234787	82235664	-	0	0	0	0	0	RLTR13B1	1086
chr18	82458543	82458971	+	0	0	0	0	0	IAPLTR2_Mm	1087
chr18	85033047	85040118	+	0.0333029	0.0312072	0.0250049	0.0513421	0.053789	L1Md_A	1088
chr18	87081883	87085413	-	0.0153923	0.00480791	0	0.00541208	0	IAPLTR2b	1089
chr18	87965445	87968204	+	0	0.00615099	0	0	0	IAPLTR2a2_Mm	1090
chr19	4957686	4958223	-	0.0336743	0.252442	0.328689	0.0355206	0.134677	IAPLTR2_Mm	1091
chr19	6897183	6897543	+	0.050185	0.047027	0.0544274	0	0	RLTR44B	1092
chr19	9512850	9513095	+	0	0	0	0	0	RLTR13D6	1093
chr19	10179008	10179326	-	0.454339	0.425749	1.04709	0.359437	0.113568	IAPLTR2b	1094
chr19	13807369	13808221	+	0	0	0	0	0	RLTR13B4	1095
chr19	16080623	16084344	+	0.00486748	0.0136836	0.0105579	0.0154031	0	IAPLTR2b	1096
chr19	19153165	19156224	+	0.00592051	0	0.00642101	0	0	IAPLTR2a2_Mm	1097
chr19	21043903	21044015	-	0	0	0	0	0.160302	MER20	1098
chr19	28077093	28077433	-	0	0	0	0	0	ERVB7_1-LTR_MM	1099
chr19	29852288	29852681	+	0	0	0	0	0	IAPLTR2a	1100
chr19	33373233	33373782	-	0	0.0308668	0	0.138982	0.131739	IAPLTR1_Mm	1101
chr19	33896620	33896923	-	0	0	0	0	0	IAPLTR4	1102
chr19	39478625	39482125	-	0	0	0	0	0	IAPEY2_LTR	1103
chr19	39915882	39916341	+	0	0	0.0427136	0	0	IAPLTR2_Mm	1104
chr19	40066569	40068630	+	0.00878602	0.00823314	0.00952875	0	0	IAPLTR2a2_Mm	1105
chr19	41002336	41002766	-	0	0	0	0	0	IAPLTR2_Mm	1106
chr19	41413261	41413645	+	0	0	0	0	0	L1MB8	1107
chr19	42345974	42350309	+	0.0125347	0.0117459	0.00906286	0.0088146	0.020888	IAPLTR1a_Mm	1108
chr19	42351308	42351603	+	0	0	0	0	0	RMER13A1	1109
chr19	42939436	42939823	+	0	0	0	0	0	IAPLTR2_Mm	1110
chr19	45186537	45190245	+	0.00488454	0.00457717	0.00529746	0	0.00488382	IAPLTR1a_Mm	1111
chr19	47193031	47193937	-	0	0	0.0216629	0	0	RLTR13F	1112
chr19	52985550	52990946	+	0.0369251	0.0220191	0.0291247	0.0177043	0.0302069	IAPLTR1_Mm	1113
chr19	53451071	53451260	-	0.0953514	0	0	0.100579	0	ID_B1	1114
chr19	58897812	58898175	-	0.149314	0.139918	0.0539788	0.262501	0.199056	MMERVK10D3_I-int	1115
chr19	59662159	59665034	-	0	0	0	0	0	IAPLTR2a2_Mm	1116
chr19	59872018	59874885	-	0.0252675	0.0236775	0.00685086	0.0066632	0.0378956	IAPLTR2a2_Mm	1117
chrX	23619368	23620195	-	0.0656405	0.0615099	0.0711894	0.0461596	0	RLTR13B4	1118
chrX	52840804	52841015	-	0	0	0	0	0	RLTR13C2	1119
chrX	54016167	54019606	+	0	0	0.00571171	0	0	IAPEY2_LTR	1120
chrX	70675227	70676690	+	0	0	0	0	0	IAP-d-int	1121
chrX	101091916	101092400	+	0	0	0	0	0.0373486	IAPLTR2a2_Mm	1122
chrX	152522532	152522905	+	0	0	0	0	0	RLTR44A	1123
chrX	155841523	155842321	-	0	0	0	0	0	RLTR13C2	1124
chrX	163267369	163268285	+	0	0	0	0	0	RLTR13G	1125
chrX	168176612	168181616	+	0.00723947	0.00339195	0	0.00763639	0.0072384	IAPLTR2_Mm	1126

## Sheet: Table S3
Table S3. DNA methylation levels (%) of non-imprinted unique targets of ZFP57 (methylated in either or both germlines) (data obtained from [30-32]).
CHR	START	END	LABEL	Oocyte	Sperm	2cell	4cell	Blastocyst	ICM	TE	E6.5 EpiBlast	E6.5 ExE	Closest Gene
chr6	101150264	101150733	oocyte DMR	100	11.1	72.5	54.8	33.1	48.9	42.2	95.3	73.5	Pdzrn3
chr13	47009750	47011234	oocyte DMR	100	10.7	73.9	69.7	37.6	35.8	43.8	67.7	58	Nhlrc1
chr6	29092672	29092880	oocyte DMR	100	5.1	65.2	35	45.3	38.9	38.1	82.6	73.3	Lep
chr8	32477035	32477358	oocyte DMR	100	5	97.5	88.4	31.2	31.8	28.9	83.5	73.3	-
chr12	74126108	74126315	oocyte DMR	100	0	55.4	49.9	40.6	41.5	33.7	51.7	41	Syt16
chr5	143129051	143129521	oocyte DMR	99.7	0	72.5	66.3	57	43.5	53.2	87.7	79.8	Rnf216
chr4	55010793	55011004	sperm DMR	20.8	98.3	42.8	46.6	14.5	10.3	6.2	89	89.6	Zfp462
chr10	85503605	85503804	sperm DMR	15.4	100	36.9	7.9	16.8	-	13.1	78.5	91.7	Btbd11
chr15	6665724	6666568	sperm DMR	12.5	84.9	27.9	8.1	3.5	1.9	11.4	76.1	45.7	Fyb
chr3	147961958	147962253	sperm DMR	1.4	98.5	52.2	36.3	22	32.1	27.6	88.5	73	-
chr4	140823495	140824201	sperm DMR	0	97.4	27.8	11	5.9	2.8	6.6	91.7	62.2	Padi1
chr4	54999616	54999976	sperm DMR	0	95	38.7	43.4	8.3	20.1	1	95.1	82.8	Zfp462
chr10	88690517	88691378	sperm DMR	0	94.7	23.6	4.4	1.8	0	0.4	92.5	67.1	Spic
chr14	118419658	118420175	sperm DMR	0	94.2	55.1	44	29	34.6	17.8	87.3	39.6	-
chr3	34841189	34841371	sperm DMR	0	93.8	39.4	46.7	19.6	20.3	16.1	91.9	74.1	DQ549901
chr2	181075673	181076183	sperm DMR	0	93.5	31.9	24.4	9.1	8.2	9.7	88.1	48.7	Kcnq2
chr13	113305223	113305516	sperm DMR	0	92.1	58.8	23	17.8	53	42.1	96.5	76.4	-
chr9	107590326	107590649	both gametes methylated	100	100	64.8	61.9	41.1	39.7	37.9	83.9	90.9	Ifrd2
chr4	156174157	156175034	both gametes methylated	100	100	63.8	65.2	40.4	51.3	43.4	94.3	88.2	Agrn
chr5	144879516	144879707	both gametes methylated	100	100	63.7	66.4	33	38.8	29.2	95.1	83.2	Smurf1
chr10	83383857	83384224	both gametes methylated	100	100	68.9	73.3	35.4	53.6	29.4	93	89	AB336927
chr5	104061926	104062321	both gametes methylated	100	98.3	72.4	58.8	18.1	62.1	37.9	96.8	88.5	Nudt9
chr19	16143169	16143349	both gametes methylated	100	98.2	86.1	74.1	38	63.5	61.4	88.4	84.1	Gnaq
chr4	47071583	47071784	both gametes methylated	100	98.1	88.3	83.8	76.5	35.4	60.4	97.9	71.8	Anks6
chr11	17208366	17208660	both gametes methylated	100	97.9	81.1	59.5	38.2	47.9	30.4	95	88	Pno1
chr10	59491448	59491798	both gametes methylated	100	97.5	61.7	61.8	31.2	29.7	31.3	94.9	84.9	Mcu
chr1	131129717	131130074	both gametes methylated	100	97.3	76.7	64.7	45.3	39.6	54.4	96.1	95.8	Dyrk3
chr8	22560966	22561567	both gametes methylated	100	97.3	72.4	72.3	33.8	53.6	46.4	91.5	94.1	Slc20a2
chr13	111703480	111703821	both gametes methylated	100	97.1	75.7	72.5	46.3	35.7	26.9	95.2	89.2	Mier3
chr1	72339510	72340186	both gametes methylated	100	97	71.9	67.1	42	46.4	51.5	98.1	85.5	Xrcc5
chr8	77446563	77446754	both gametes methylated	100	96.7	90.3	90.6	67.3	75	78.2	94.7	97.6	Arhgap10
chr8	22903062	22903329	both gametes methylated	100	95.7	82.5	64	22.2	50.6	38.8	92.8	87	Kat6a
chr8	23916017	23916216	both gametes methylated	100	95.7	74.3	81	24.2	60.8	56.1	93.9	77.7	Zmat4
chr2	156762618	156762917	both gametes methylated	100	95.6	62.9	41.2	32.9	51	62.3	78.5	88.8	Dlgap4
chr7	109026602	109026909	both gametes methylated	100	95	73.8	62.6	48.9	25.1	52.8	91.3	71.8	Tub
chr3	116758696	116758906	both gametes methylated	100	94.5	88.3	88.7	74.1	65.1	62.5	93.4	83.5	Agl
chr9	115282940	115283677	both gametes methylated	100	93.9	78.7	80.4	34.7	41.4	43.9	86.3	82.8	Stt3b
chr14	20374121	20374533	both gametes methylated	100	92.2	78.6	70	45.1	48.6	40.2	89.8	72.3	Fam149b
chr10	43882212	43882561	both gametes methylated	100	91.3	83	75.7	44.7	47	50.8	94.1	90.5	Qrsl1
chr4	43543051	43543614	both gametes methylated	100	90.4	69.8	69.4	32.5	58.4	47	94.1	96	Tln1
chr15	4079326	4079933	both gametes methylated	100	89.5	84.7	82.3	40.1	63.4	52.1	93.5	82.1	Oxct1
chr7	24104752	24105925	both gametes methylated	100	81.3	51.9	54.8	41.7	31.4	34.4	89.5	82.6	Zfp180
chr4	128585493	128586015	both gametes methylated	99.8	97.1	75.2	75.3	46.7	36.2	42.2	89.4	94.2	Zscan20
chr7	105618892	105619303	both gametes methylated	99.8	93.2	74.4	69.8	48.9	40.2	48.2	47.2	86	Trim3
chr4	154972370	154973102	both gametes methylated	99.8	91.1	78.5	69.3	53.3	48.4	39.9	94	91.9	Pank4
chr16	9106831	9107898	both gametes methylated	99.3	96	80.6	51.6	31	27.8	22.6	93.3	80.8	-
chr12	71242031	71242458	both gametes methylated	99.3	88.7	72.2	47.9	44.2	65.6	56.4	98.9	93.6	2700049A03Rik
chr3	115906292	115907710	both gametes methylated	99	100	79.5	75.8	59.2	61.3	52.7	96	94	Dph5
chr5	114803258	114803596	both gametes methylated	98.7	91.6	65.4	62.3	27.7	43.8	32.6	85.2	58.5	Ankrd13a
chr4	156176092	156177490	both gametes methylated	94.5	97.5	82	76.9	50.6	57.4	52.8	94.8	92.6	Agrn
chr4	156178554	156179123	both gametes methylated	94	100	83.9	80.4	58	58.9	55.8	96	94.9	Agrn
chr11	108062209	108062603	both gametes methylated	93.8	95.8	60.4	67	52.6	51.5	34.5	91.5	80	Prkca
chr14	9320739	9320919	both gametes methylated	92.5	90.1	65.4	63	26.1	17	20.7	87.3	45.8	-
chr10	41958558	41959024	both gametes methylated	91.7	95.3	30.5	25.6	19	13	17.6	85.9	42.4	Armc2
chr10	60715740	60716218	both gametes methylated	90.6	100	87.4	83.8	57	49.7	46.2	93.7	85.7	Slc29a3
chr8	35854077	35854411	both gametes methylated	90	97.7	87.2	84.1	62.7	50.7	39.2	91.6	72.8	5430403N17Rik
chr13	37948856	37949201	both gametes methylated	89.6	100	84.5	84.6	42.3	57.8	37.8	92.2	82.5	Rreb1
chr15	96583742	96583968	both gametes methylated	81.5	97.7	60.1	50.8	38.8	53.4	35.7	94.5	67.4	Slc38a1
chr7	127867768	127867994	both gametes methylated	100	76.7	67.2	60.7	33.6	52.8	61.6	93.2	82.8	Zfp668

## Sheet: Table S4
Table S4. Allele specific DNA methylation (%) of the same regions as shown in Table S3 according to Wang et al, 2014 [30].
ID	CHR	START	END	Maternal %ME			Paternal %ME
				2 cell	4 cell	ICM	2 cell	4 cell	ICM
mgDMR1	chr6	101150264	101150733	-	-	-	-	-	-
mgDMR2	chr13	47009750	47011234	92.3	85.4	88.8	1.1	0.1	4.1
mgDMR3	chr6	29092672	29092880	91.5	-	88.5	0	0	-
mgDMR4	chr8	32477035	32477358	97.3	100	58.9	-	-	-
mgDMR5	chr12	74126108	74126315	-	-	-	-	-	-
mgDMR6	chr5	143129051	143129521	-	-	-	-	-	-
pgDMR1	chr4	55010793	55011004	17.7	18.2	0	12.9	53.2	-
pgDMR2	chr10	85503605	85503804	35.8	7.2	5.6	54.5	-	-
pgDMR3	chr15	6665724	6666568	-	-	-	-	-	-
pgDMR4	chr3	147961958	147962253	-	-	-	-	-	-
pgDMR5	chr4	140823495	140824201	30.4	15.2	0.9	12.1	7.5	3.1
pgDMR6	chr4	54999616	54999976	12.8	36.2	0	-	35.7	55.7
pgDMR7	chr10	88690517	88691378	-	-	-	-	-	-
pgDMR8	chr14	118419658	118420175	-	-	-	-	-	-
pgDMR9	chr3	34841189	34841371	-	-	-	-	-	-
pgDMR10	chr2	181075673	181076183	-	-	-	-	-	-
pgDMR11	chr13	113305223	113305516	-	-	-	-	-	-
nonDMRs1	chr9	107590326	107590649	-	-	-	-	-	-
nonDMRs2	chr4	156174157	156175034	-	-	-	-	-	-
nonDMRs3	chr5	144879516	144879707	88.4	100	53.8	0	-	-
nonDMRs4	chr10	83383857	83384224	-	-	-	-	-	-
nonDMRs5	chr5	104061926	104062321	-	-	-	-	-	-
nonDMRs6	chr19	16143169	16143349	-	-	-	-	-	-
nonDMRs7	chr4	47071583	47071784	96	84.2	71.2	16.4	89.7	7.2
nonDMRs8	chr11	17208366	17208660	-	72.8	87.5	-	-	75
nonDMRs9	chr10	59491448	59491798	-	-	-	-	-	-
nonDMRs10	chr1	131129717	131130074	95.2	93	-	55.7	55	-
nonDMRs11	chr8	22560966	22561567	96.2	92.7	82.9	18.6	15.6	1.2
nonDMRs12	chr13	111703480	111703821	-	-	-	-	-	-
nonDMRs13	chr1	72339510	72340186	-	-	-	-	-	-
nonDMRs14	chr8	77446563	77446754	96.9	-	-	-	-	87.5
nonDMRs15	chr8	22903062	22903329	93	95.4	82.9	-	22.8	-
nonDMRs16	chr8	23916017	23916216	-	-	-	-	-	-
nonDMRs17	chr2	156762618	156762917	-	-	-	-	-	-
nonDMRs18	chr7	109026602	109026909	-	-	-	-	-	-
nonDMRs19	chr3	116758696	116758906	81.7	97.9	-	-	72.9	-
nonDMRs20	chr9	115282940	115283677	-	-	-	-	-	-
nonDMRs21	chr14	20374121	20374533	-	-	-	-	-	-
nonDMRs22	chr10	43882212	43882561	-	-	-	-	-	-
nonDMRs23	chr4	43543051	43543614	-	-	-	-	-	-
nonDMRs24	chr15	4079326	4079933	-	-	-	-	-	-
nonDMRs25	chr7	24104752	24105925	-	-	-	-	-	-
nonDMRs26	chr4	128585493	128586015	97.1	-	-	-	-	-
nonDMRs27	chr7	105618892	105619303	-	-	-	-	-	-
nonDMRs28	chr4	154972370	154973102	91.4	98	-	41.2	35	34.3
nonDMRs29	chr16	9106831	9107898	-	-	-	-	-	-
nonDMRs30	chr12	71242031	71242458	-	-	-	-	-	-
nonDMRs31	chr3	115906292	115907710	91	95.8	96.7	53.3	56.2	11.1
nonDMRs32	chr5	114803258	114803596	96.6	94.1	63.9	2.3	2.4	5
nonDMRs33	chr4	156176092	156177490	96.8	97.6	80	35.8	53.7	25.6
nonDMRs34	chr4	156178554	156179123	-	-	-	-	-	-
nonDMRs35	chr11	108062209	108062603	-	-	-	-	-	-
nonDMRs36	chr14	9320739	9320919	-	-	-	-	-	-
nonDMRs37	chr10	41958558	41959024	-	-	-	-	-	-
nonDMRs38	chr10	60715740	60716218	-	-	-	-	-	-
nonDMRs39	chr8	35854077	35854411	95.9	89.1	62.5	43.8	16.6	30
nonDMRs40	chr13	37948856	37949201	-	-	-	-	-	-
nonDMRs41	chr15	96583742	96583968	78.9	84.1	64.4	21.4	12.5	0
nonDMRs42	chr7	127867768	127867994	-	-	-	-	-	-
